# Supplementary material
Source: PubMed Central journal article supplement (PMC3233640)
Supplement: NIHMS333482-supplement-SI.pdf [file NIHMS333482-supplement-SI.pdf]

**Supporting Information**

**Metal-Free Intermolecular Oxidative C-N Bond Formation via Tandem C-H / N-H Bond Activation**

Abhishek A. Katak, Shathaverdhan Potavathri, Rose A. Barham, Kaitlyn M. Romano and Brenton  
DeBoef<sup>\*†</sup>

Department of Chemistry, University of Rhode Island, 51 Lower College Road,  
Kingston, Rhode Island 02881, United States

## Experimental Section

### Reagents

Substrates including phthalimide, 4-nitrophthalimide, 3,4,5,6-tetrachlorophthalimide, naphthalimide, saccharin, succinimide, potassium phthalimide, 2-pyrrolidinone, benzene, *p*-xylene, *o*-xylene, *m*-xylene, toluene, 1,4-difluorobenzene, 1,2-dichlorobenzene, 4-methylanisole, pentamethylbenzene, pentafluorobenzene were purchased from Sigma Aldrich and Fisher Scientific. Iodobenzene diacetate was purchased from Acros Chemicals. Flash chromatography was performed on Silicycle silica gel (60Å, 40-63 μm). All reagents were stored under an inert atmosphere before use.

### Instrumentation

Reactions were carried out in a CEM Discover microwave. GC/MS analysis was carried out on an Agilent Technologies 6890 GC system fixed with a 5973 mass selective detector. NMR spectra were acquired using a Bruker Avance 300MHz spectrometer.

### Synthesis of 2-phenylisoindoline-1,3-Dione (**2**)

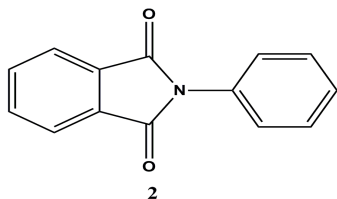

A magnetically stirred solution of phthalimide (0.10 g, 0.68mmol), iodobenzene diacetate (0.55 g, 1.7mmol) in 4 mL of benzene was microwave heated at 145 °C for 3 h. The excess solvent from the mixture is removed at reduced pressure and the crude product was purified by column chromatography to give pure **2** (0.133 g, 88 %). The NMR spectra matched with that of previously published.<sup>1</sup>

***R<sub>f</sub>*-Value:** Hexane/Ethyl acetate (8:2 v/v) = 0.31.

**<sup>1</sup>H NMR (400 MHz, CDCl<sub>3</sub>):**  $\delta$  = 7.39-7.53 (m, 5H), 7.80 (dd,  $J$  = 5.4 Hz, 2.8 Hz, 2H), 7.96 (dd,  $J$  = 5.6 Hz, 3.2 Hz, 2H).

**<sup>13</sup>C NMR (100 MHz, CDCl<sub>3</sub>):**  $\delta$  = 123.7, 126.5, 128.1, 129.1, 131.7, 134.4, 167.30.

**LRMS EI (m/z):** [M<sup>+</sup>] calc'd for C<sub>14</sub>H<sub>9</sub>NO<sub>2</sub> 223.06, observed 223.10 m/z.

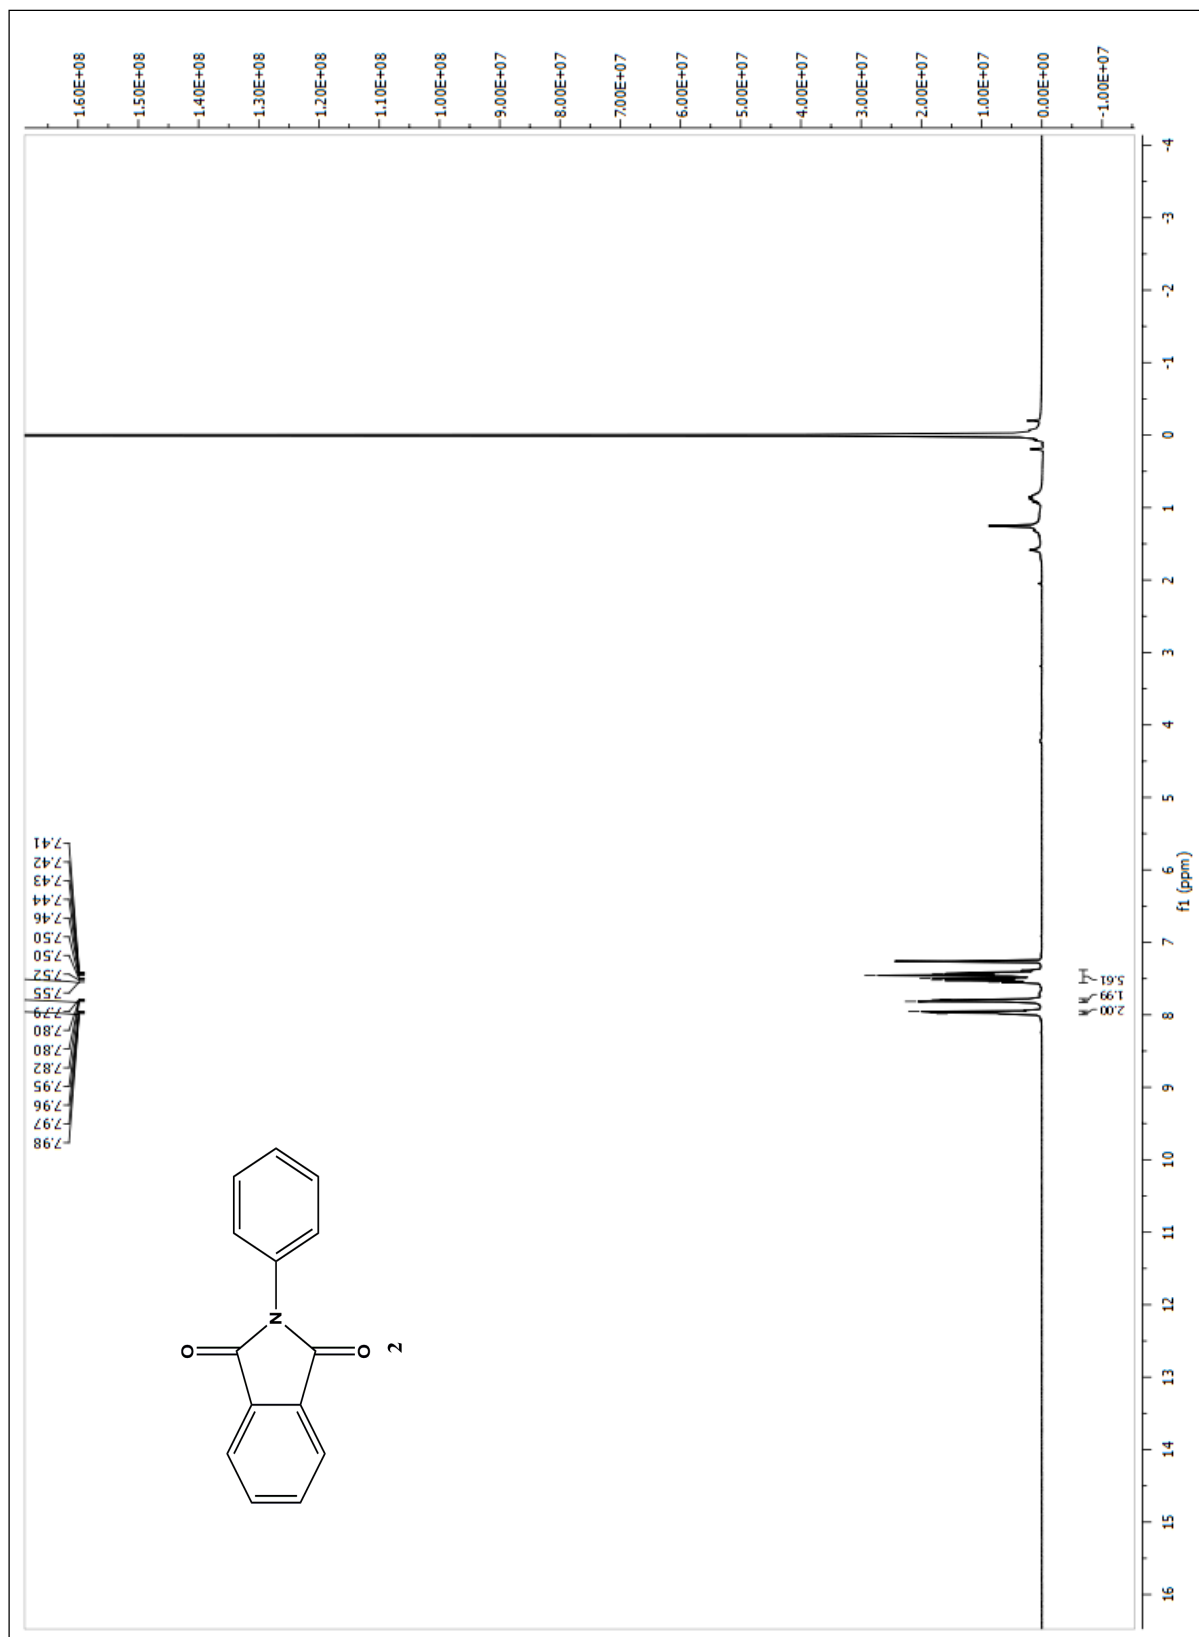

Spectra 1. <sup>1</sup>H NMR of Compound 2

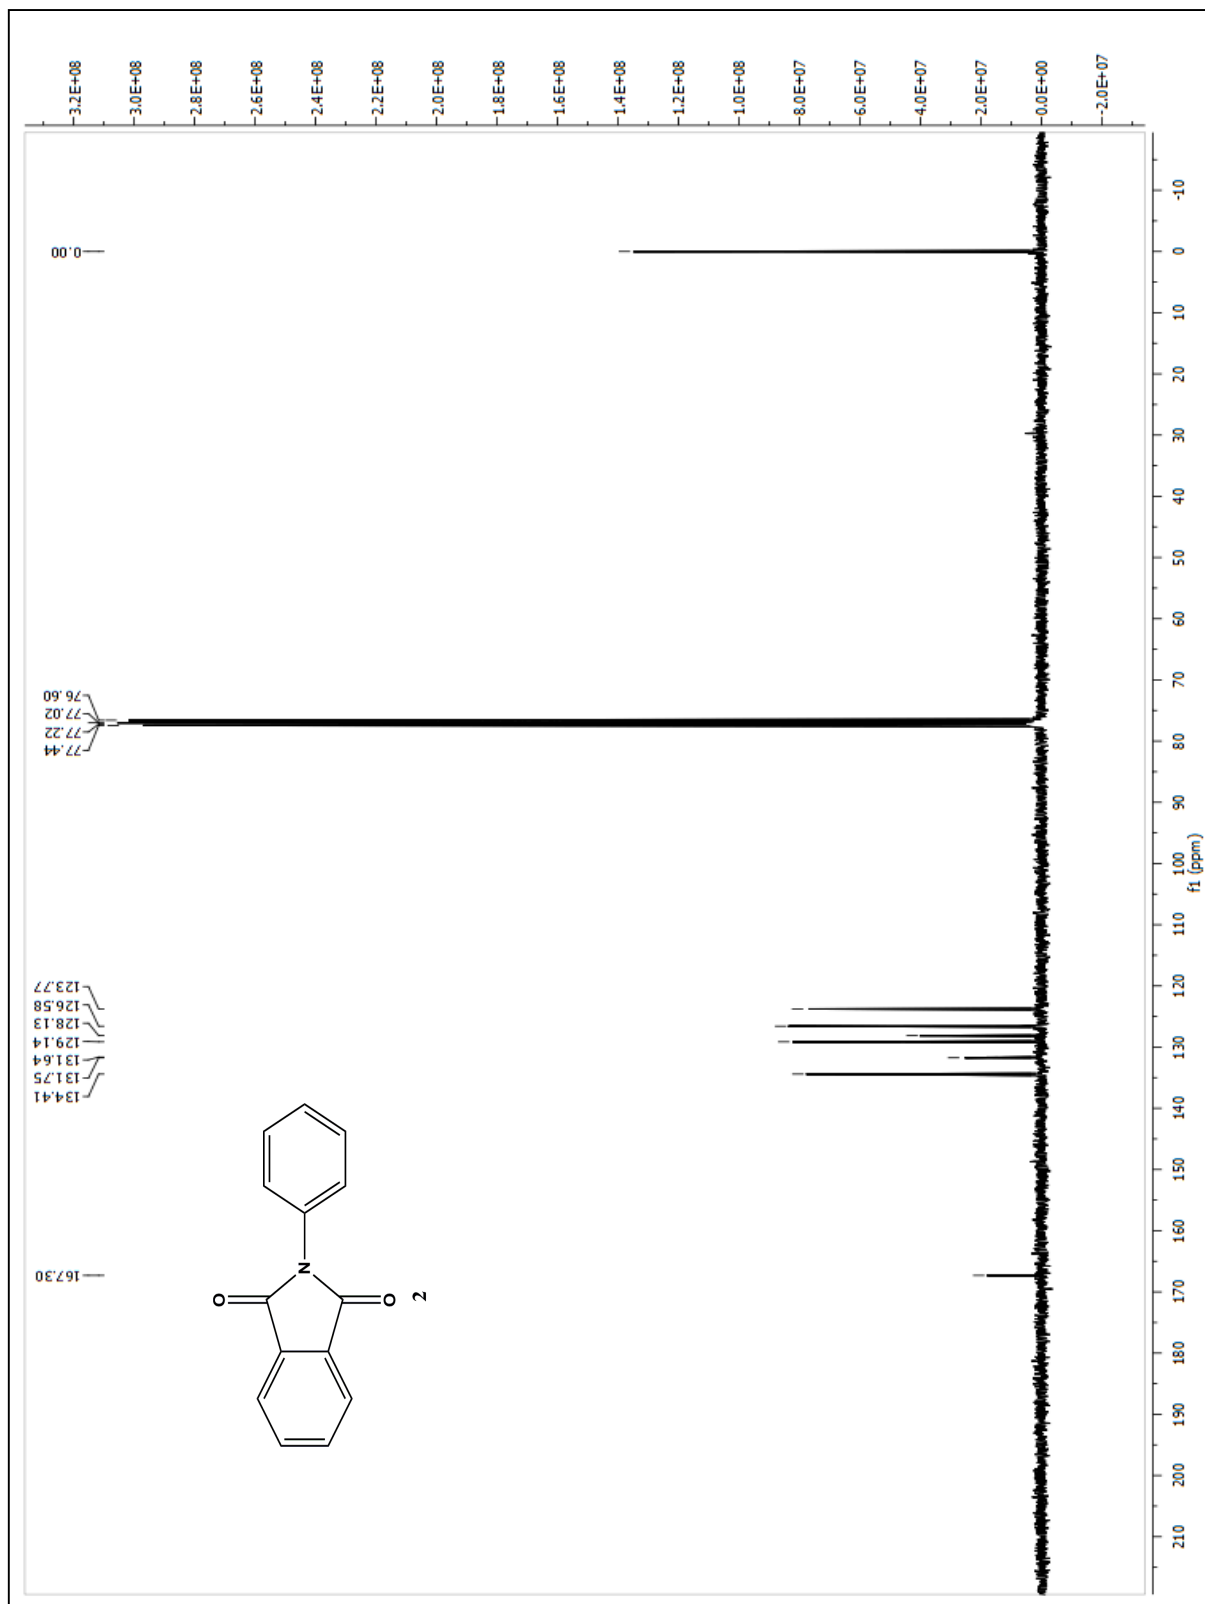

Spectra 2. <sup>13</sup>C NMR of Compound 2

### Synthesis of **3**

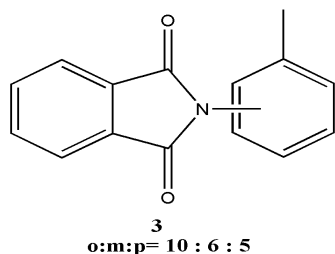

A magnetically stirred solution of phthalimide (0.10 g, 0.68mmol), iodobenzene diacetate (0.55 g, 1.7mmol) in 4 mL of toluene was microwave heated at 145 °C for 3 h. The excess solvent from the mixture is removed at reduced pressure and crude product was purified by column chromatography to give pure **3** (0.1071 g, 70 %, o: m: p = **10:6:5**). The isomers were identified by comparing with known NMR spectra.<sup>2</sup>

**R<sub>f</sub>-Value:** Hexane/Ethyl acetate (9:1 v/v) = 0.2.

**<sup>1</sup>H NMR (300 MHz, CDCl<sub>3</sub>):** δ = 2.21 (s, 3H), 2.41 (s, 1H), 2.42 (s, 2H), 7.18 – 7.43 (m, 10H), 7.80 (dd, *J* = 5.4, 3.1 Hz, 5H), 7.92 – 7.99 (m, 4H).

**<sup>13</sup>C NMR (75 MHz, CDCl<sub>3</sub>):** δ = 18.06, 21.23, 21.42, 123.70, 123.72, 123.78, 126.47, 126.89, 127.29, 128.73, 128.95, 129.07, 129.47, 129.80, 130.57, 131.17, 131.48, 131.80, 132.02, 134.33, 134.35, 136.55, 138.20, 139.15, 167.37.

**LRMS EI (m/z):** [M<sup>+</sup>] calc'd for C<sub>14</sub>H<sub>9</sub>NO<sub>2</sub> 237.08, observed 237.10 m/z.

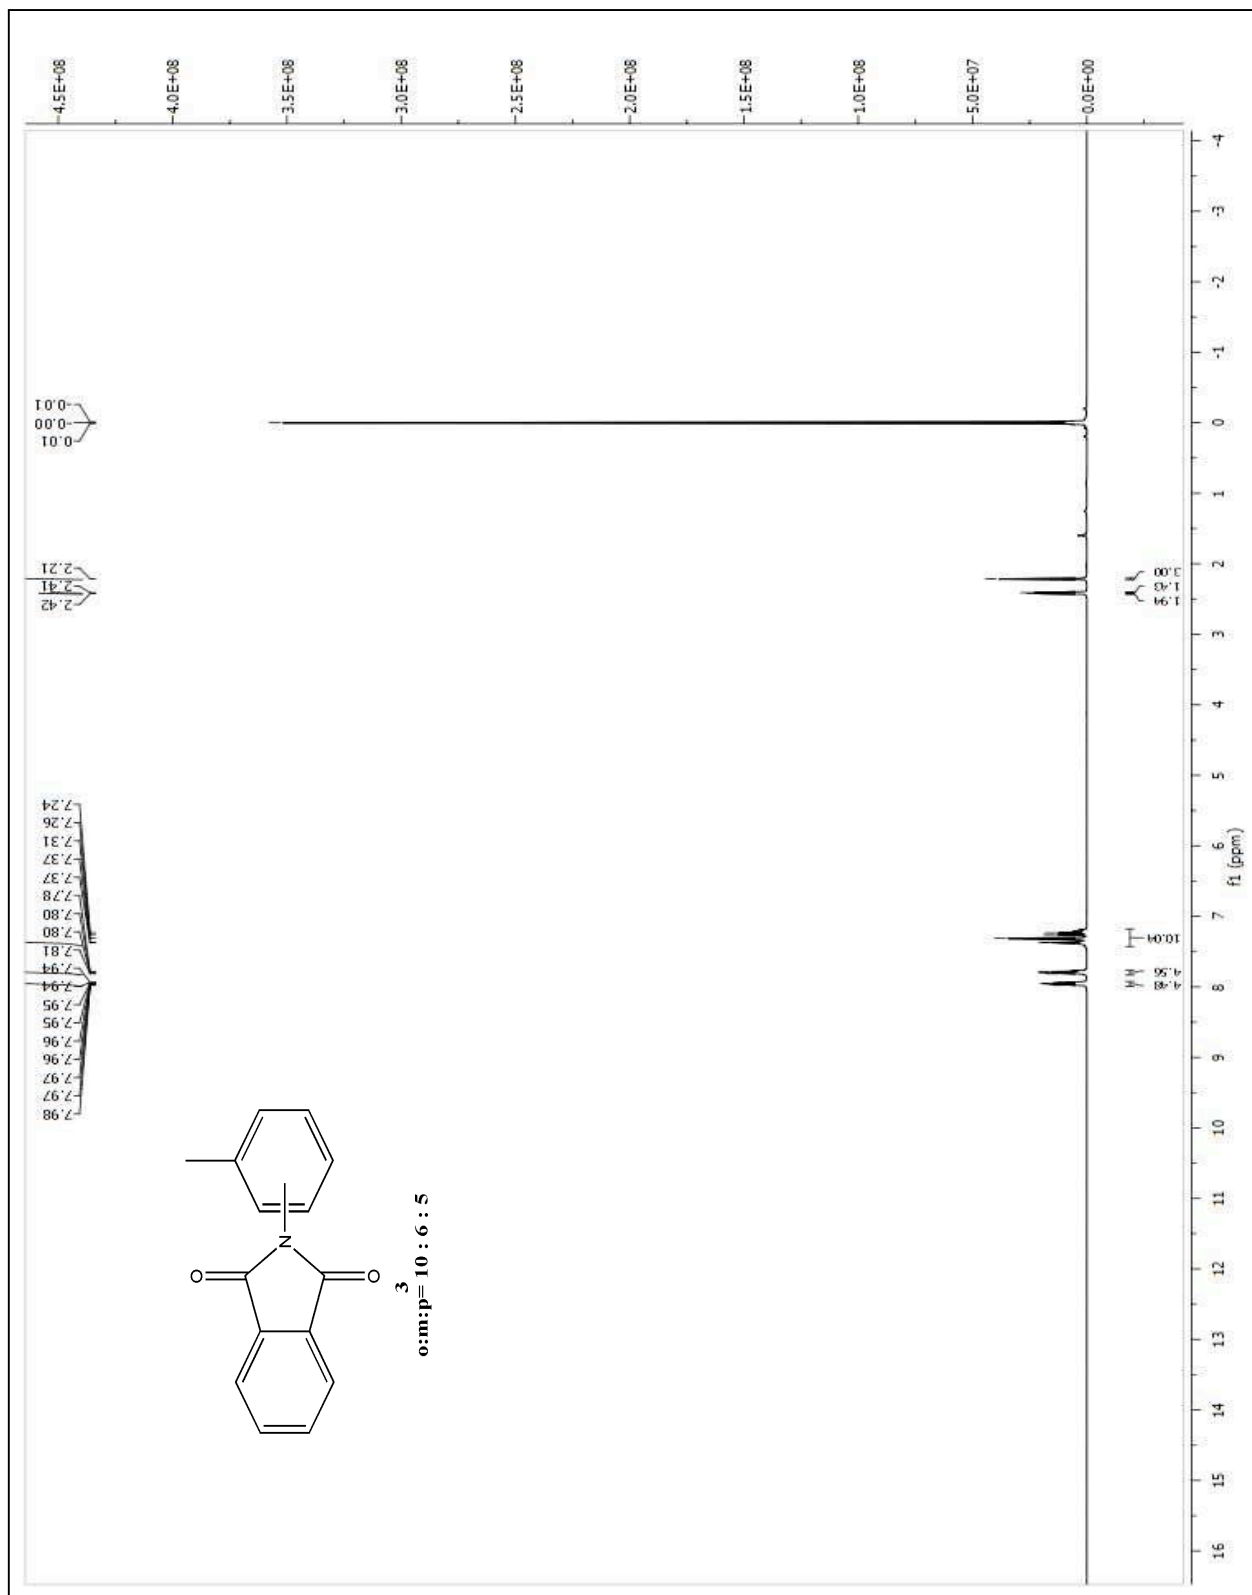

Spectra 3. <sup>1</sup>H NMR of Compound 3

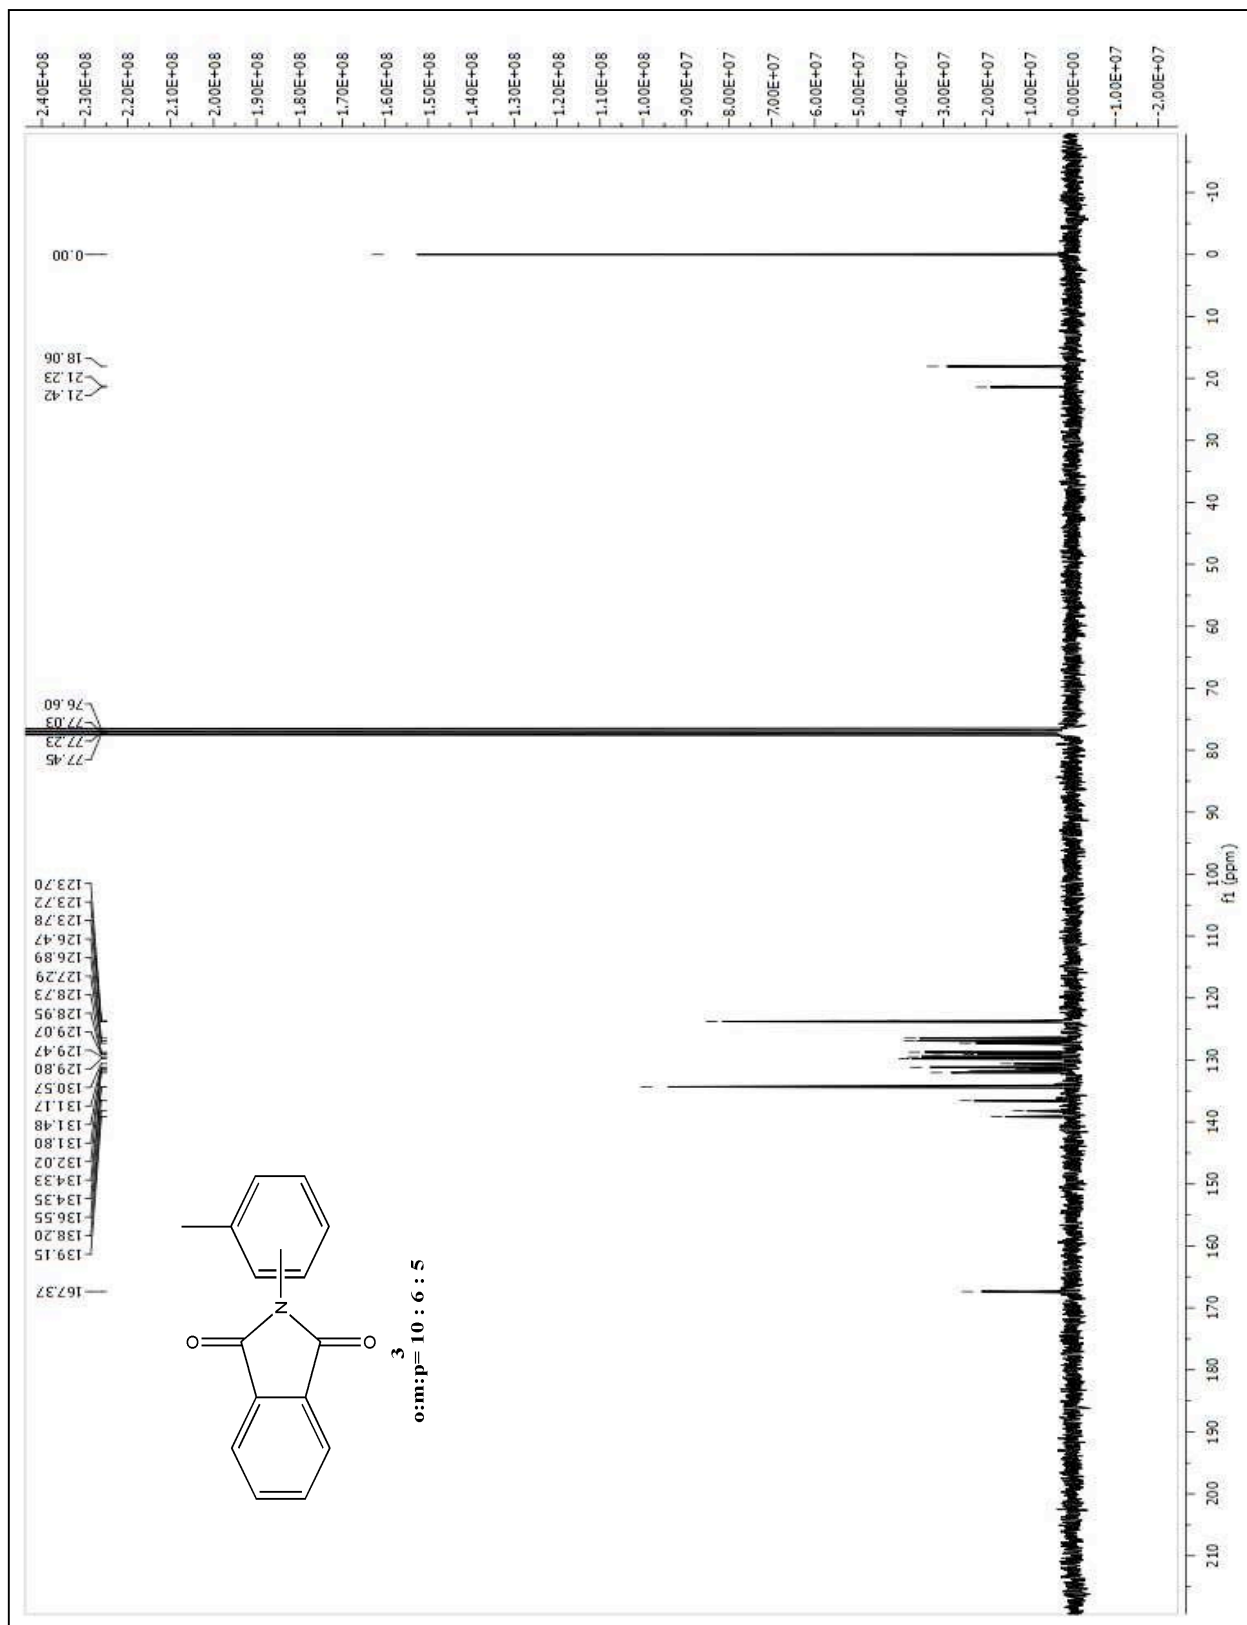

Spectra 4.  $^{13}\text{C}$  NMR of Compound 3



### Synthesis of 2-(2, 5-dimethylphenyl) isoindoline-1, 3-dione (5)

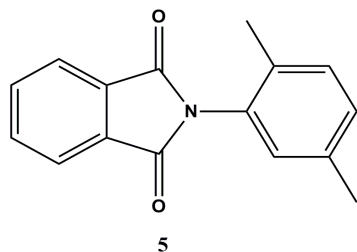

A magnetically stirred solution of Phthalimide (0.10 g, 0.68mmol), iodobenzene diacetate (0.55 g, 1.7mmol) in 4 mL of *p*-xylene was microwave heated at 145 °C for 3 h. The excess solvent from the mixture is removed at reduced pressure and the crude product was purified by column chromatography to give pure **5** 0.1535g (90 %)

***R<sub>f</sub>*-Value:** Hexane/Ethyl acetate (9:1 v/v) = 0.19.

**<sup>1</sup>H NMR (300 MHz, CDCl<sub>3</sub>):**  $\delta$  = 2.16(s, 3H), 2.36 (s, 3H), 7.17-7.28 (m, 3H), 7.80 (dd,  $J$  = 6 Hz,  $J$  = 3 Hz, 2H), 7.97 (dd,  $J$  = 3 Hz,  $J$  = 3 Hz, 2H).

**<sup>13</sup>C NMR (75 MHz, CDCl<sub>3</sub>):**  $\delta$  = 17.56, 20.83, 123.74, 129.15, 130.29, 130.37, 130.95, 132.05, 133.27, 134.29, 136.72, 167.47.

**LRMS EI (m/z):** [M<sup>+</sup>] calc'd for C<sub>16</sub>H<sub>13</sub>NO<sub>2</sub> 251.09, observed 251.10 m/z.

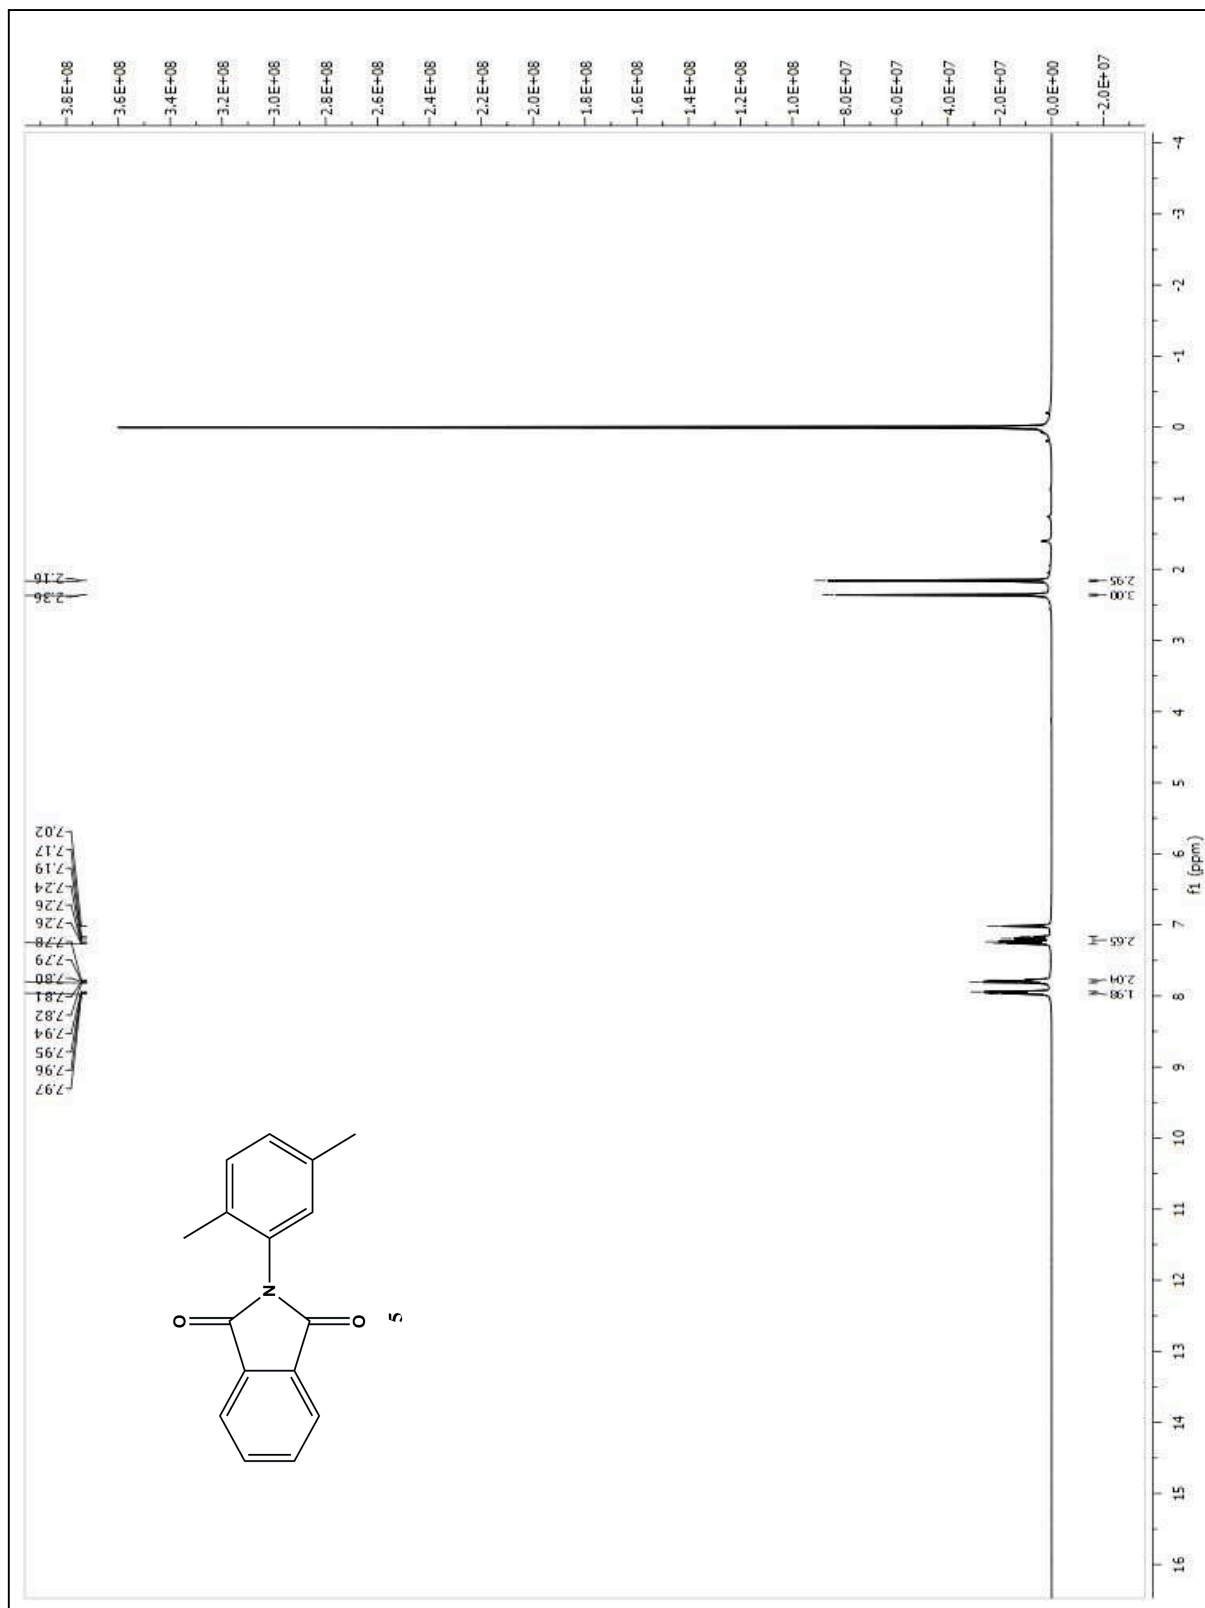

Spectra 5.  $^1\text{H}$  NMR of Compound 5

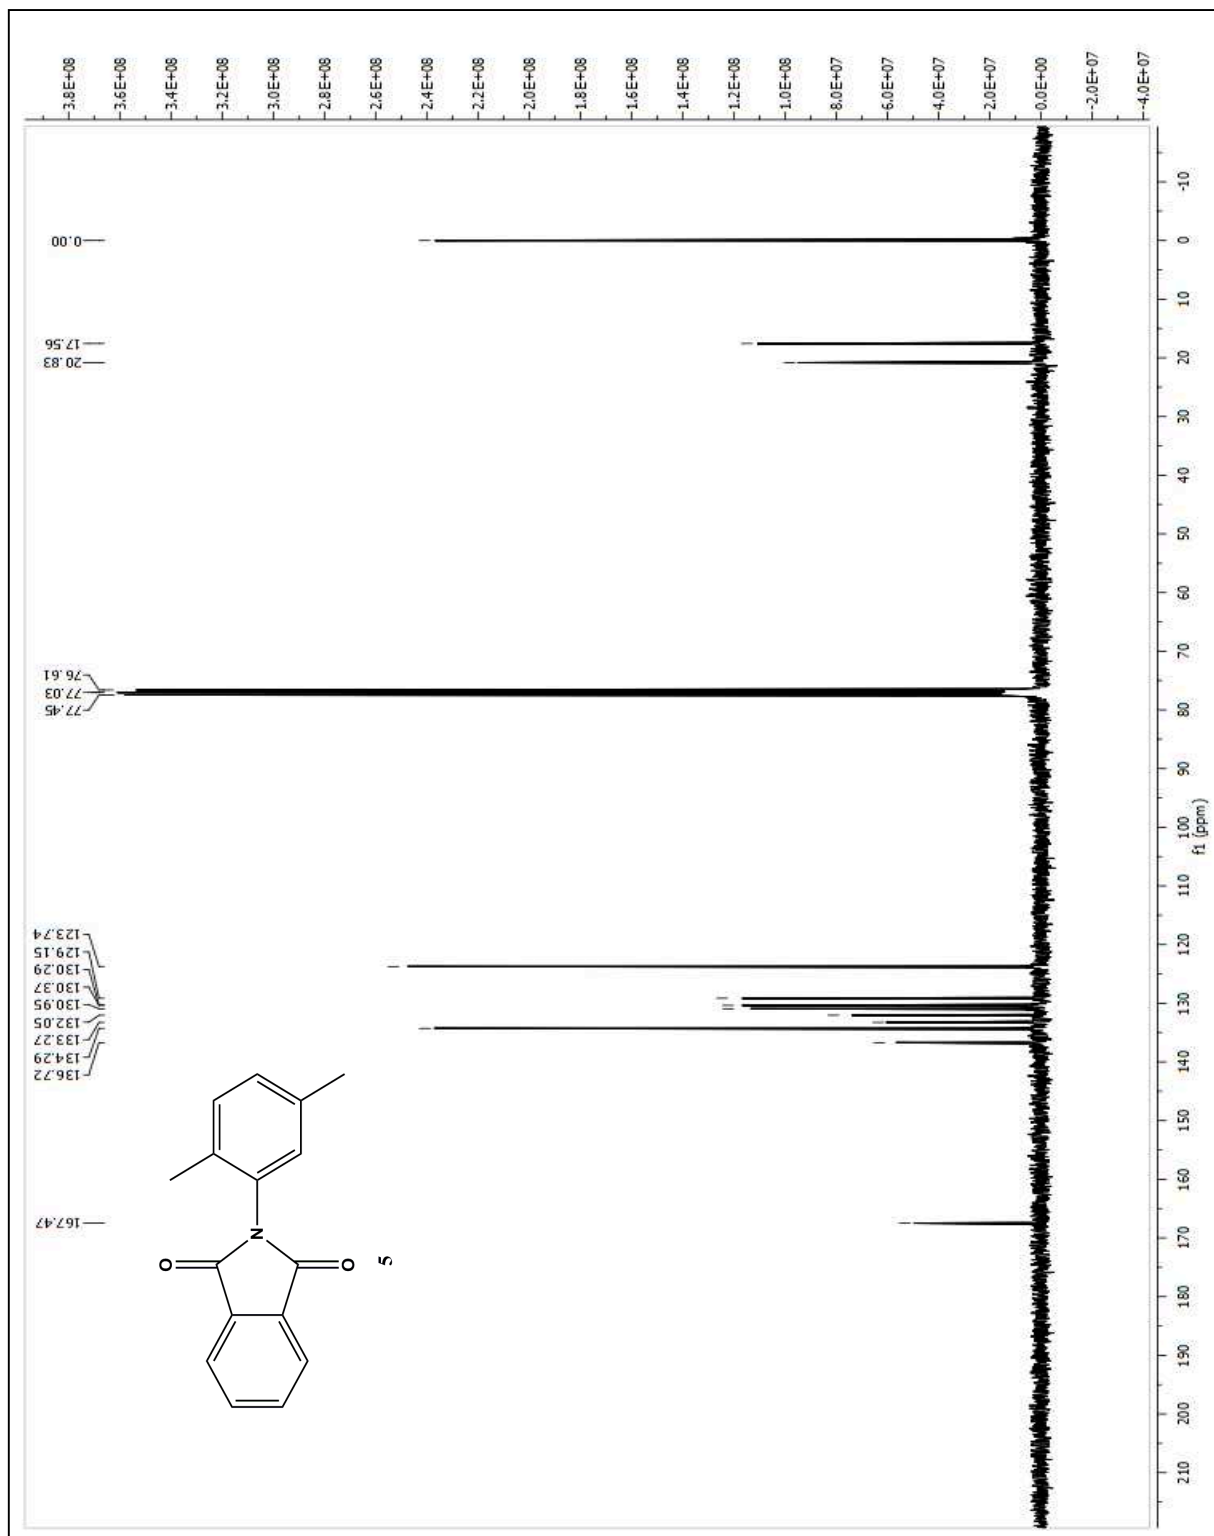

Spectra 6. <sup>13</sup>C NMR of Compound 5

### Synthesis of 2-(2, 3, 4, 5, 6-pentamethylphenyl) isoindoline-1, 3-dione (**6**)

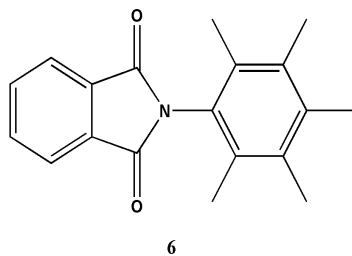

A magnetically stirred solution of phthalimide (0.10 g, 0.68mmol), iodobenzene diacetate (0.55 g, 1.7mmol), pentamethyl benzene (0.3 g, 2.048 mmol) in 4 mL of acetonitrile was microwave heated at 145 °C for 3h. The excess solvent from the mixture is removed at reduced pressure and the crude product was purified by column chromatography to give pure **6** (0.0846 g, 43 %).

***R<sub>f</sub>*-Value:** Hexane/Ethyl acetate (9:1 v/v) = 0.23.

**<sup>1</sup>H NMR (300 MHz, CDCl<sub>3</sub>):** δ = 2.06-2.26 (m, 15H), 7.79 (dd, *J* = 3 Hz, 3 Hz, 2H), 7.97 (dd, *J* = 3 Hz, 3 Hz, 2H).

**<sup>13</sup>C NMR (75 MHz, CDCl<sub>3</sub>):** δ = 15.51, 16.81, 17.04, 123.76, 126.99, 131.77, 131.97, 133.57, 134.26, 136.9, 167.81.

**LRMS EI (m/z):** [M<sup>+</sup>] calc'd for C<sub>19</sub>H<sub>19</sub>NO<sub>2</sub> 293.14, observed 293.15 m/z.

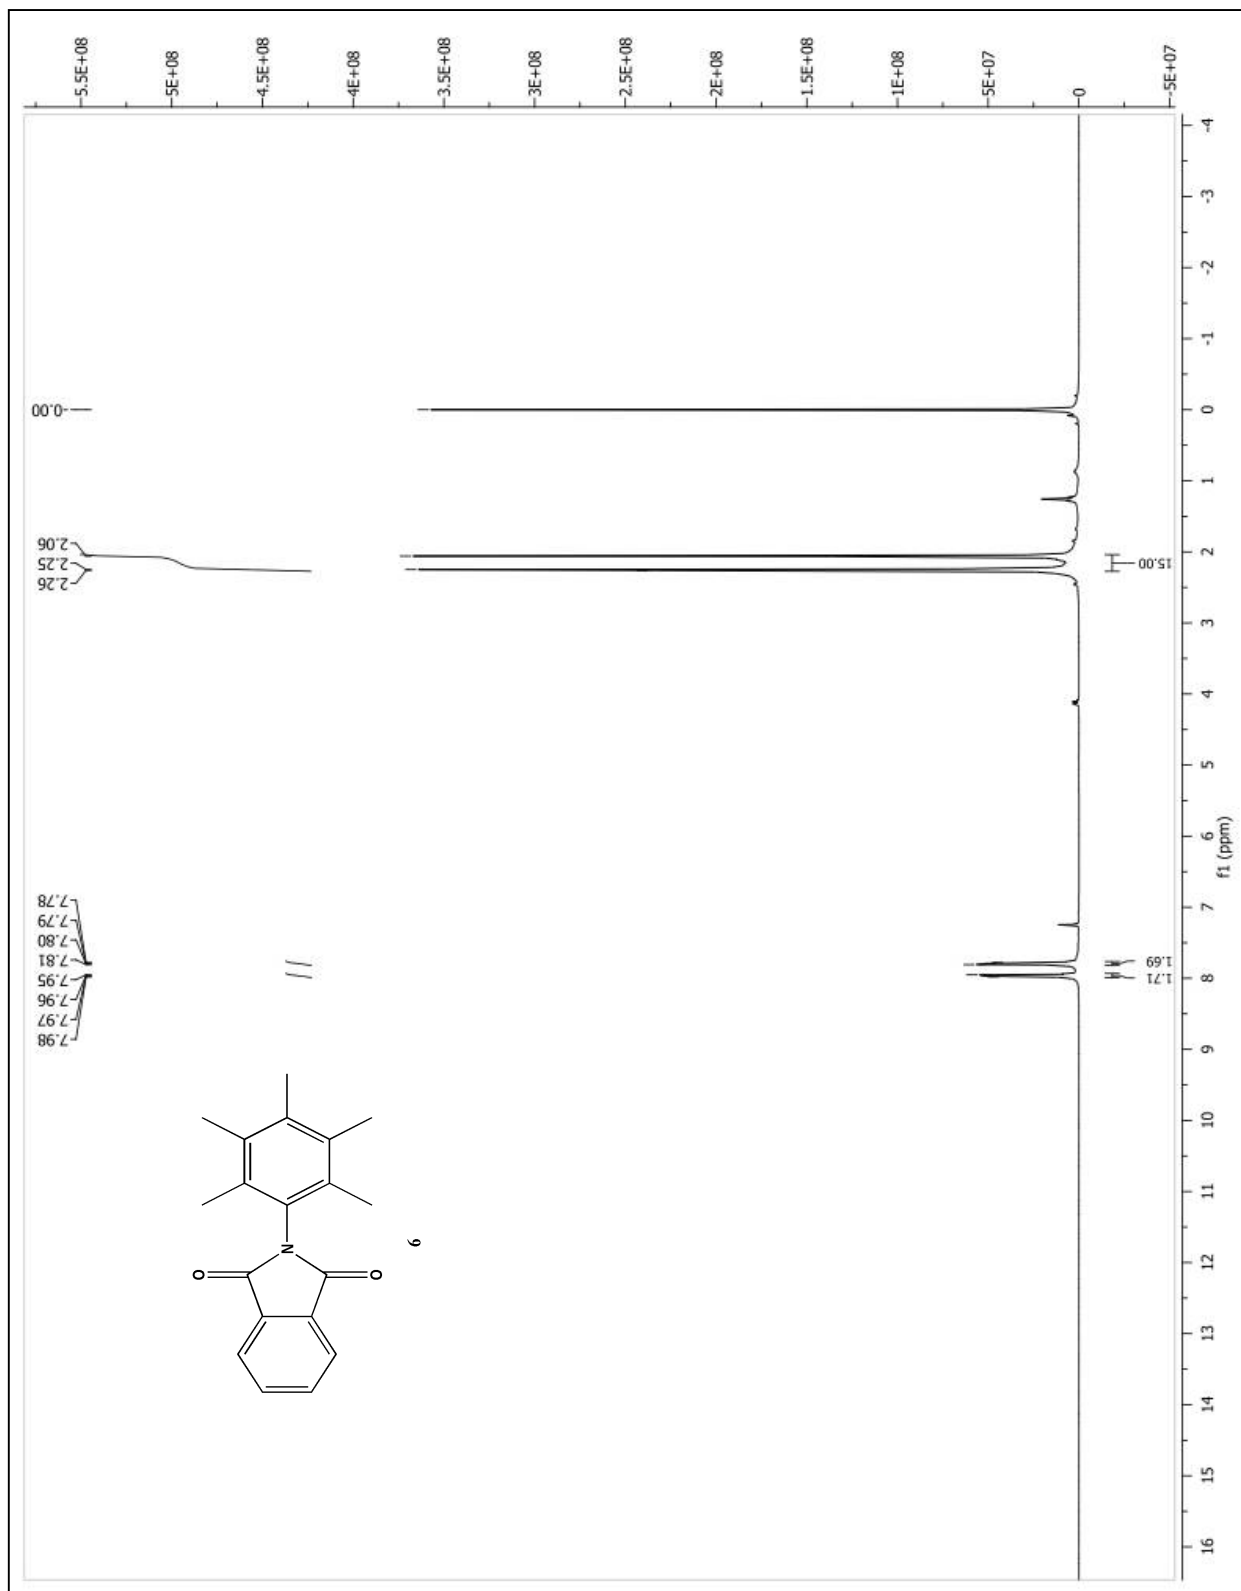

Spectra 7. <sup>1</sup>H NMR of Compound 6

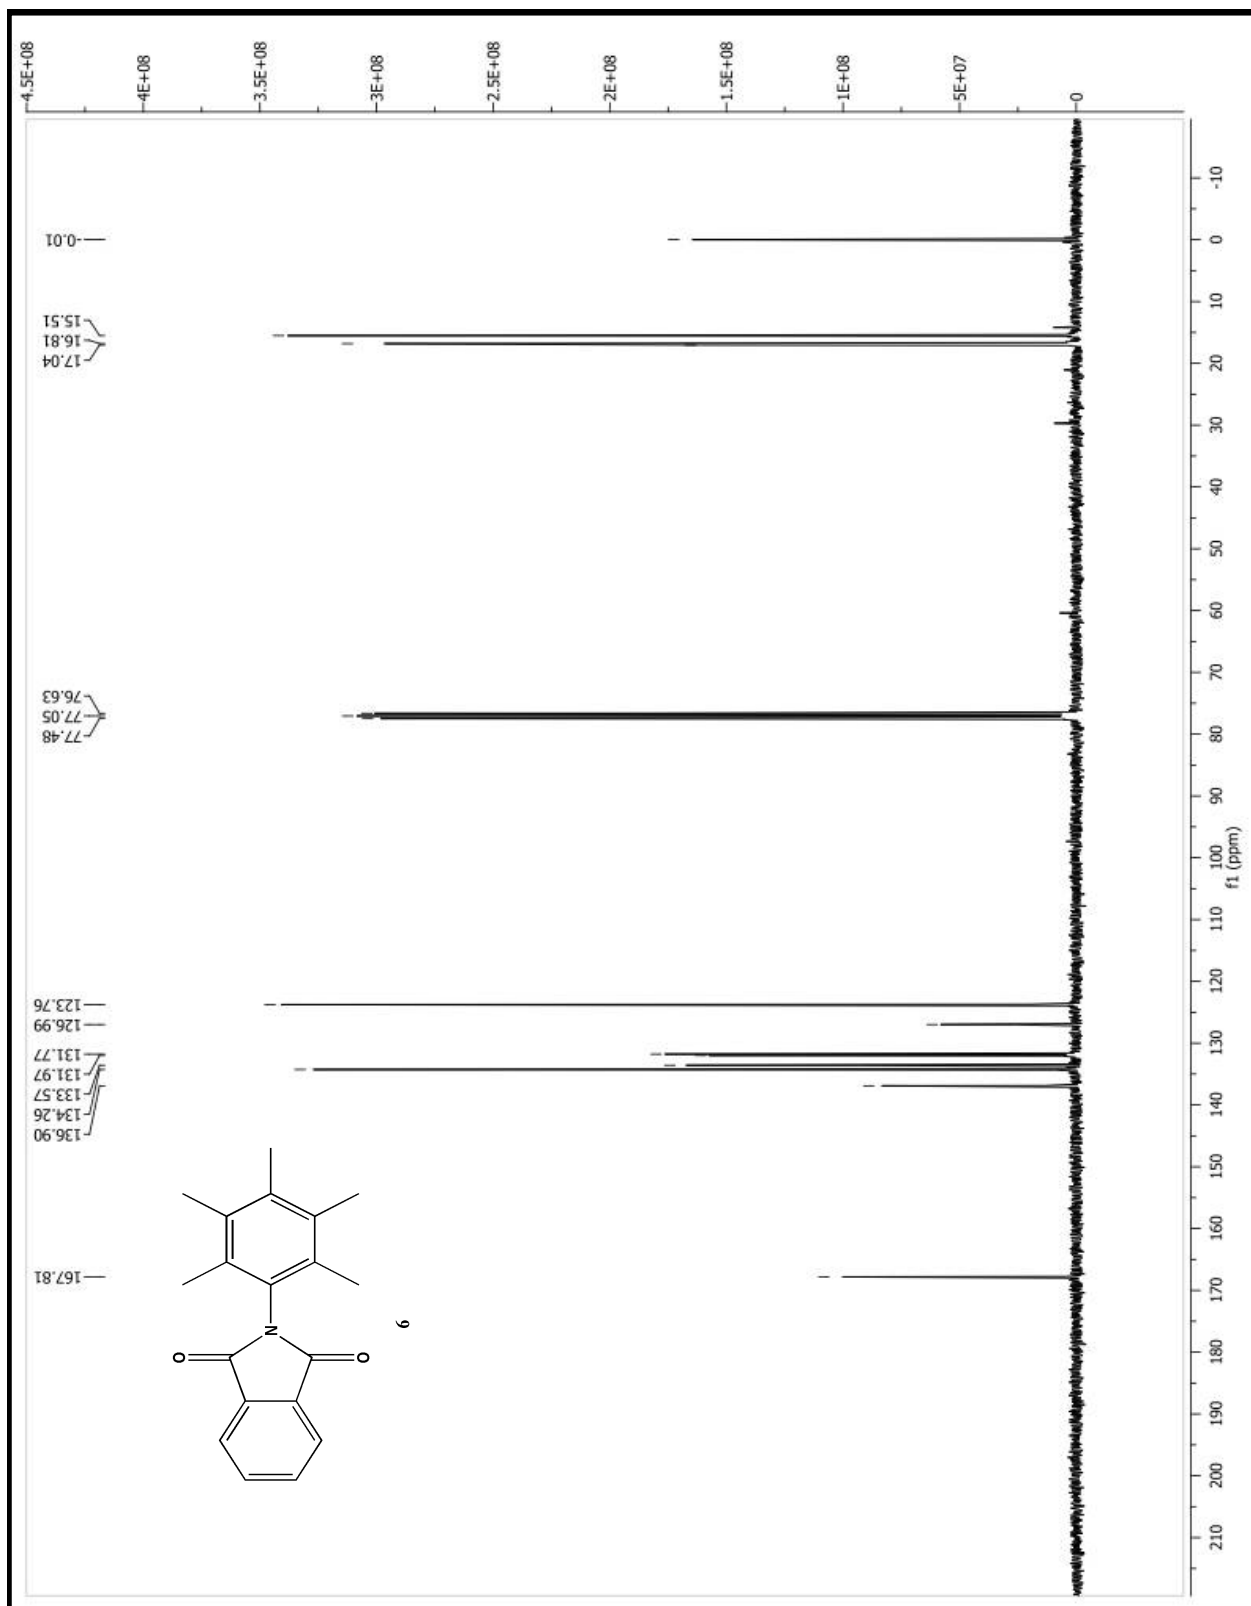

Spectra 8. <sup>13</sup>C NMR of Compound 6

### Synthesis of 2-(perfluorophenyl)isoindoline-1,3-dione (7)

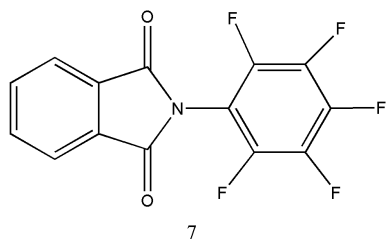

A magnetically stirred solution of Phthalimide (0.10 g, 0.68mmol), iodobenzene diacetate (0.55 g, 1.7mmol), in 4 mL of pentafluorobenzene was microwave heated at 145 °C for 3h. The excess solvent from the mixture is removed at reduced pressure and the crude product was purified by column chromatography to give pure **7** (0.04 g, 20 %).

***R<sub>f</sub>*-Value:** Hexane/Ethyl acetate (9:1 v/v) = 0.18.

**<sup>1</sup>H NMR (300 MHz, CDCl<sub>3</sub>):** δ = 7.87 (dd, *J* = 3 Hz, *J* = 3 Hz, 2H), 8.01 (dd, *J* = 3 Hz, *J* = 3 Hz, 2H).

**<sup>13</sup>C NMR (75 MHz, CDCl<sub>3</sub>):** δ = 123.89, 123.91, 124.35, 124.5, 125.82, 128.13, 131.69, 134.62, 134.88, 134.95, 135.05, 138.27.

**LRMS EI (m/z):** [M<sup>+</sup>] calc'd for C<sub>14</sub>H<sub>4</sub>F<sub>5</sub>NO<sub>2</sub> 313.02, observed 313.0 m/z.

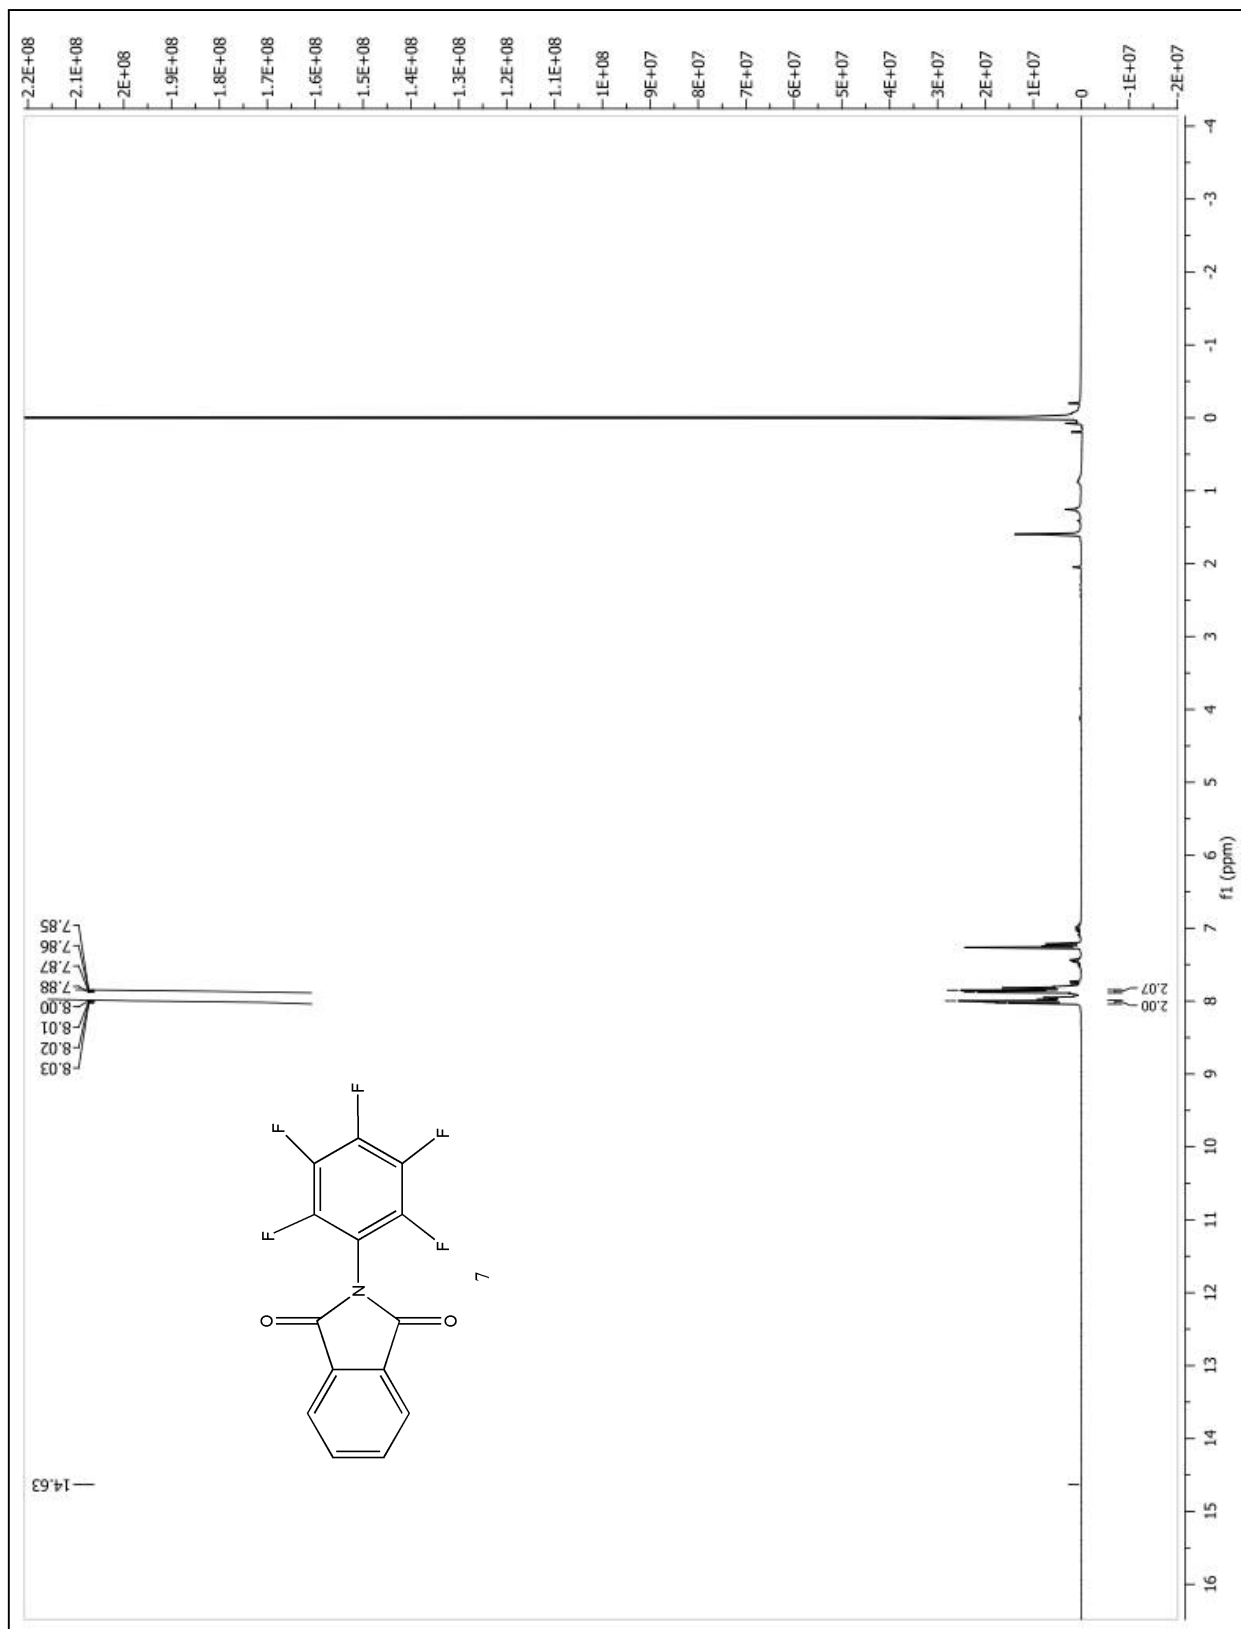

Spectra 9. <sup>1</sup>H NMR of Compound 7



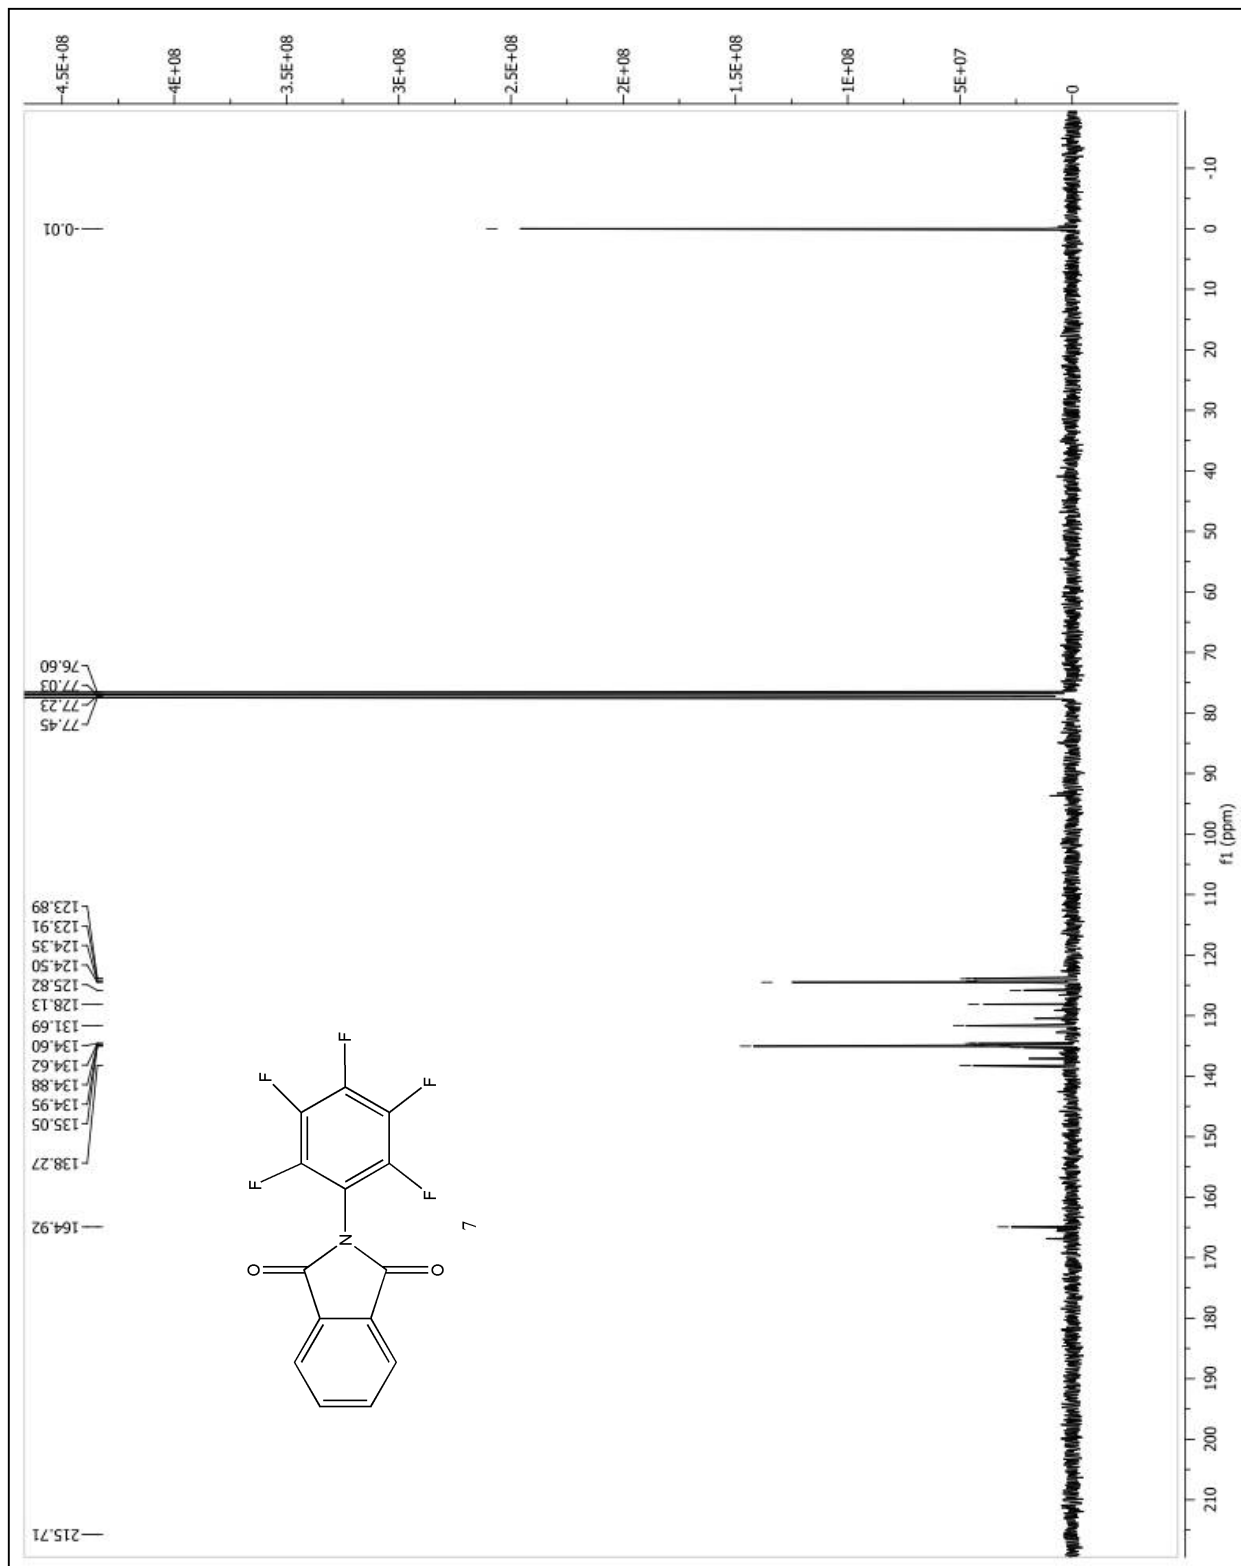

Spectra 10. <sup>13</sup>C NMR of Compound 7

### Synthesis of 2-(2,5-difluorophenyl)isoindoline-1,3-dione (**8**)

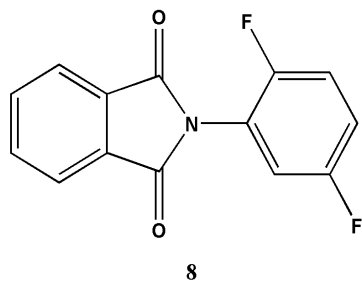

A magnetically stirred solution of phthalimide (0.10 g, 0.68mmol), iodobenzene diacetate (0.55 g, 1.7mmol) in 4 mL of 1, 4-difluorobenzene was microwave heated at 145 °C for 3h. The excess solvent from the mixture is removed at reduced pressure and crude product was purified by column chromatography to give pure **8** (0.0917 g, 53 %).

***R<sub>f</sub>*-Value:** Hexane/Ethyl acetate (9:1 v/v) = 0.19.

**<sup>1</sup>H NMR (300 MHz, CDCl<sub>3</sub>):**  $\delta$  = 7.12-7.26 (m, 3H), 7.82 (dd,  $J$  = 3 Hz,  $J$  = 3 Hz, 2H), 7.98 (dd,  $J$  = 3 Hz,  $J$  = 3 Hz, 2H).

**<sup>13</sup>C NMR (75 MHz, CDCl<sub>3</sub>):**  $\delta$  = 116.00, 116.30, 116.64, 124.10, 128.44, 131.77, 134.67, 166.06, 167.22.

**LRMS EI (m/z):** [M<sup>+</sup>] calc'd for C<sub>14</sub>H<sub>7</sub>F<sub>2</sub>NO<sub>2</sub> 259.04, observed 259.1 m/z.

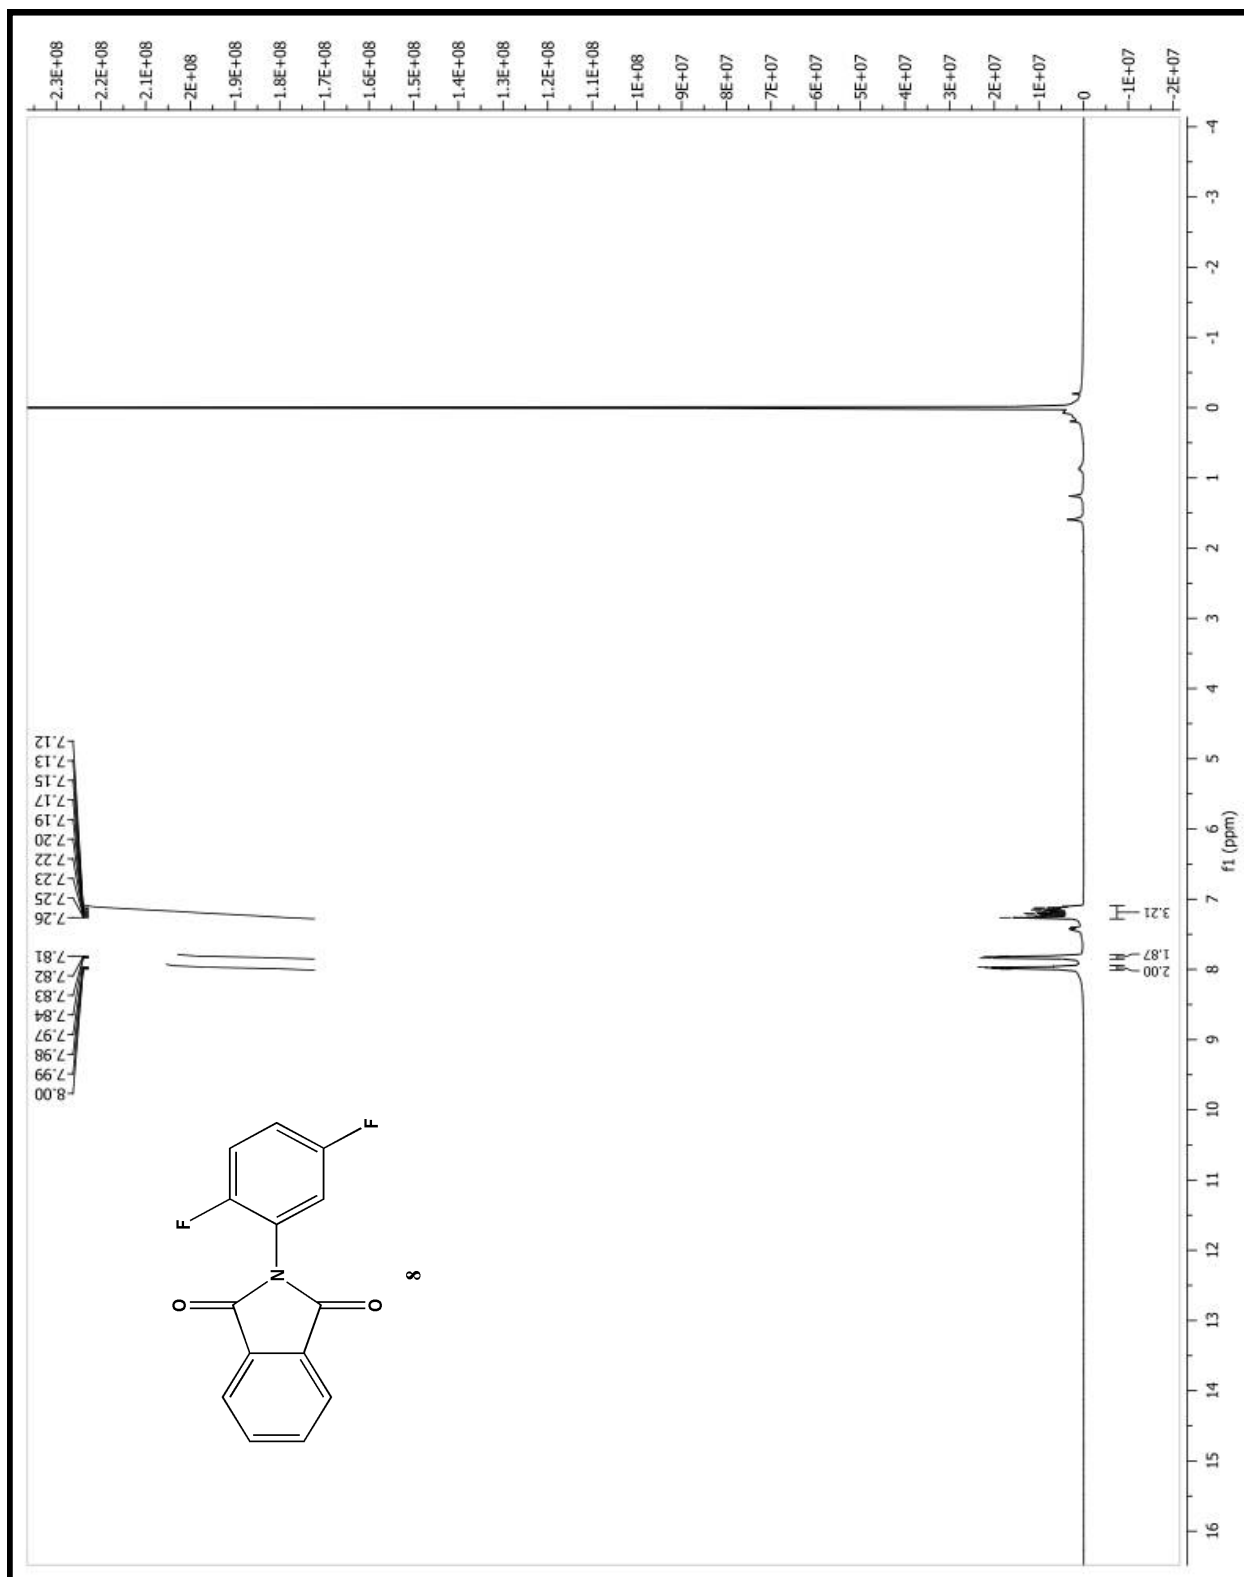

Spectra 11. <sup>1</sup>H NMR of Compound 8

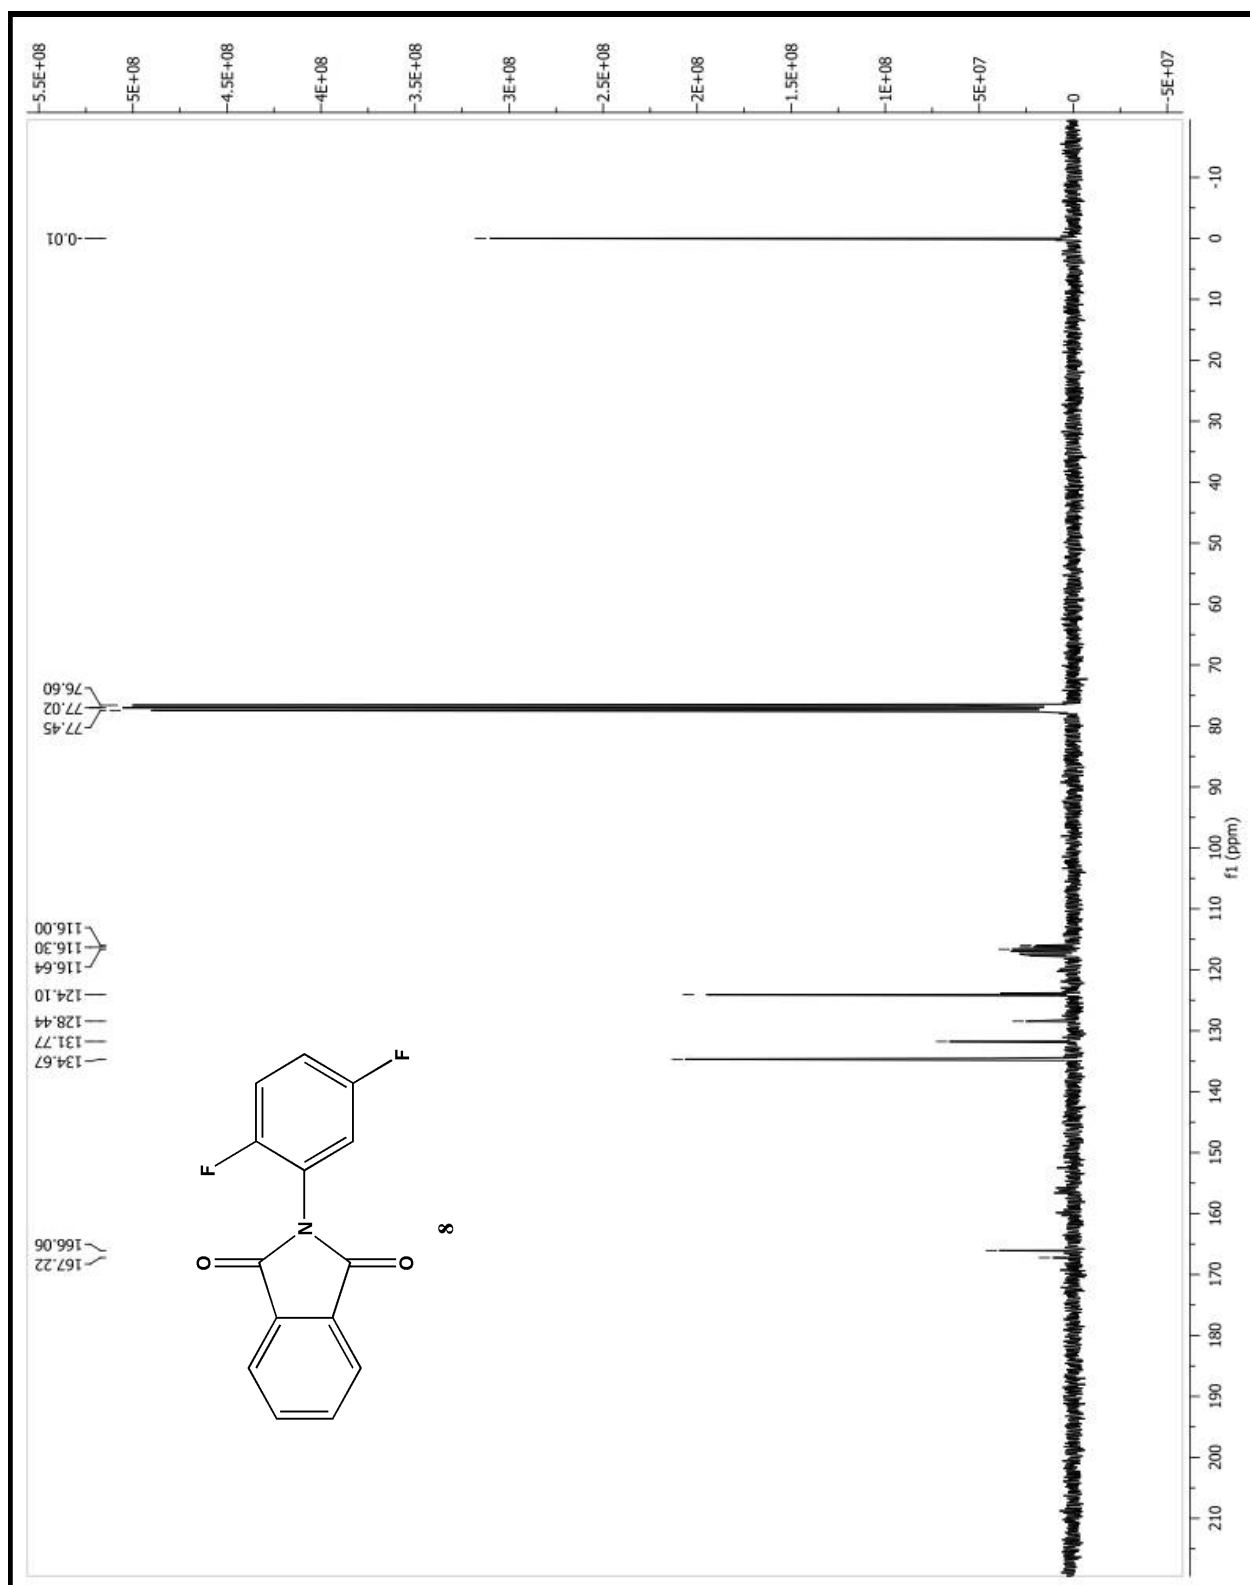

Spectra 12. <sup>13</sup>C NMR of Compound 8

### Synthesis of 2-(2, 5-bis (trifluoromethyl) phenyl) isoindoline-1, 3-dione (**9**)

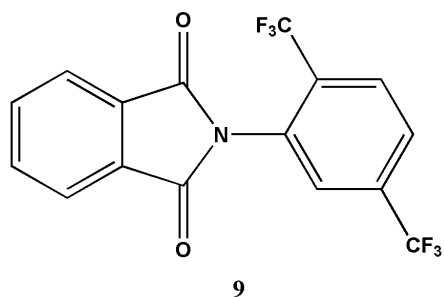

A magnetically stirred solution of Phthalimide (0.1g, 0.68mmol), (Diacetoxyiodo) benzene (0.55 g, 1.7mmol), in 4 mL of 1,4-bis(trifluoromethyl)benzene was microwave heated at 145 °C for 3h. The excess solvent from the mixture is removed at reduced pressure and crude product was purified by column chromatography to give pure **9** (0.2441 g, 24 %).

***R<sub>f</sub>*-Value:** Hexane/Ethyl acetate (9:1 v/v) = 0.2187.

**<sup>1</sup>H NMR (300 MHz, CDCl<sub>3</sub>):** δ = 7.22-7.26 (m, 1H), 7.67 (s, 1H), 7.82-8.02 (m, 5H).

**<sup>13</sup>C NMR (75 MHz, CDCl<sub>3</sub>):** δ = 123.89, 124.25, 127.18, 128.13, 129.00, 130.48, 131.72, 134.63, 134.82, 138.27, 166.66.

**LRMS EI (m/z):** [M<sup>+</sup>] calc'd for C<sub>16</sub>H<sub>7</sub>F<sub>6</sub>NO<sub>2</sub> 359.0, observed 359.0 m/z.

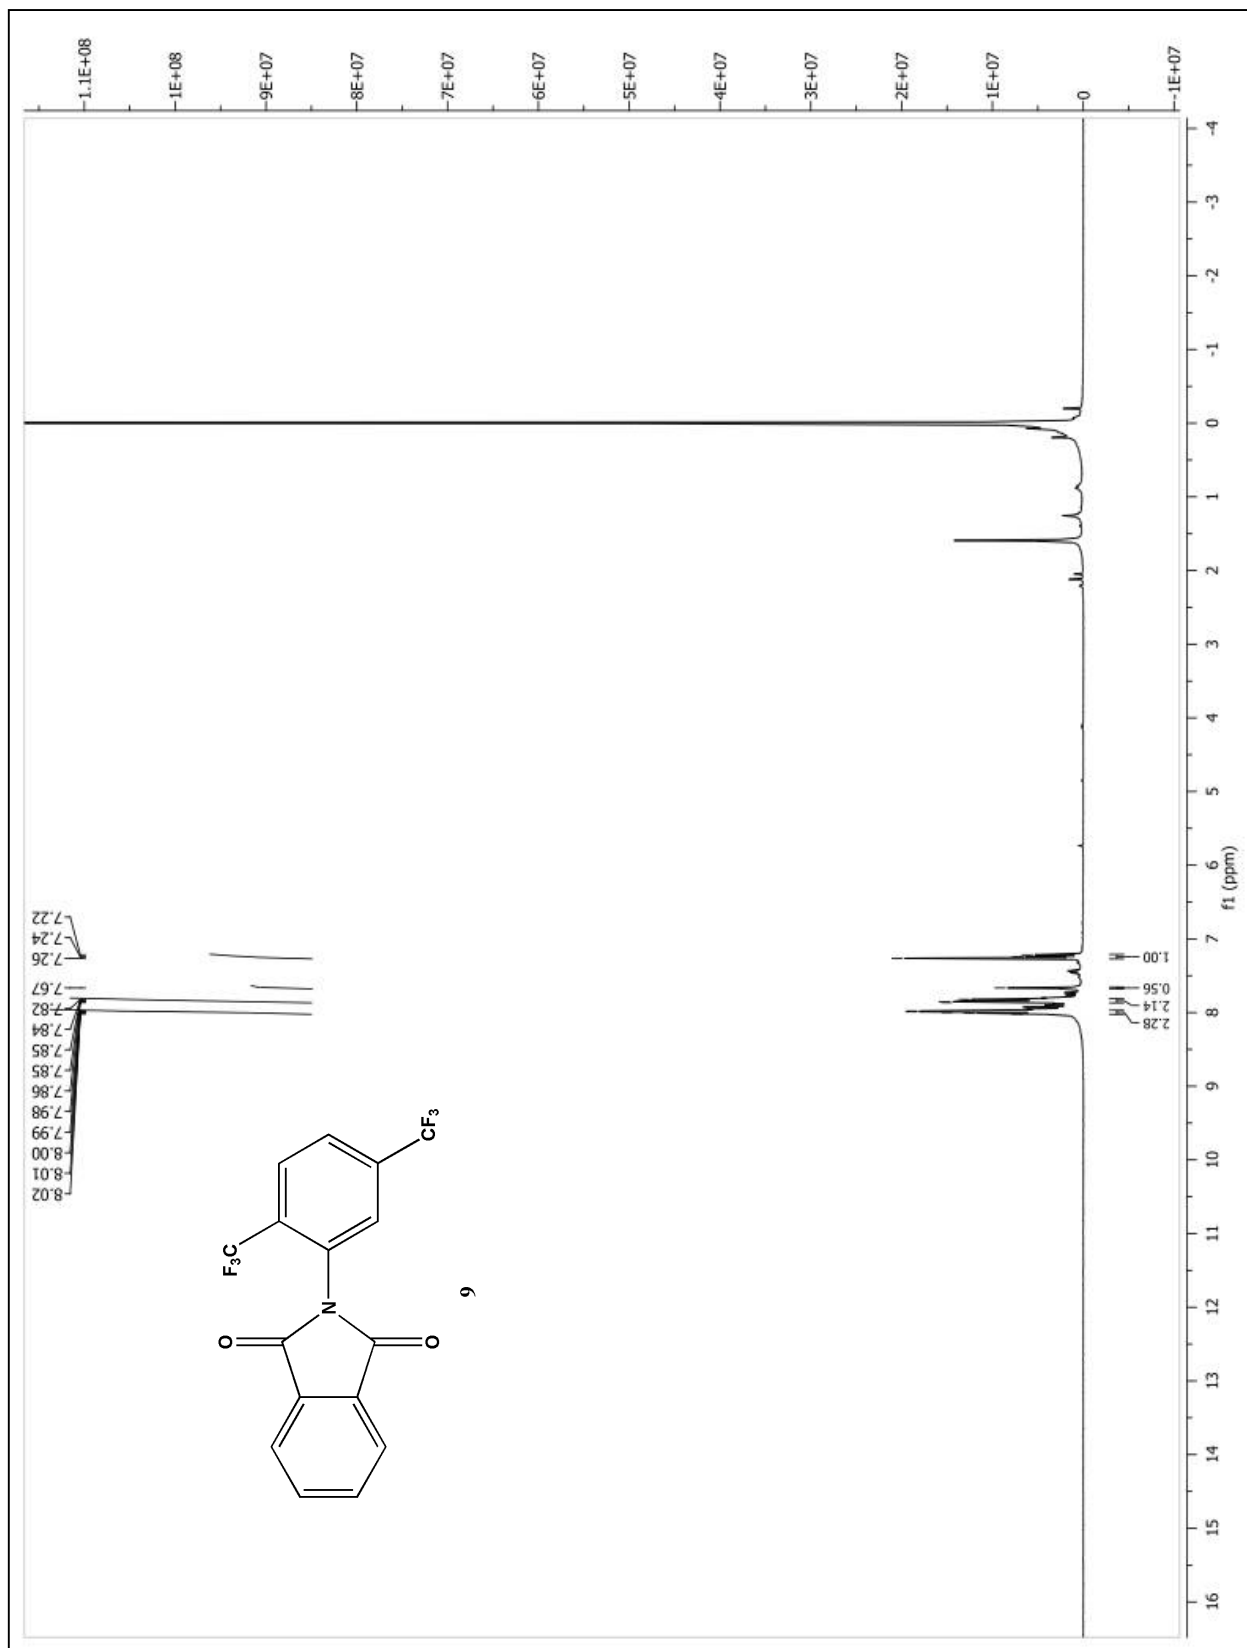

Spectra 13. <sup>1</sup>H NMR of Compound 9

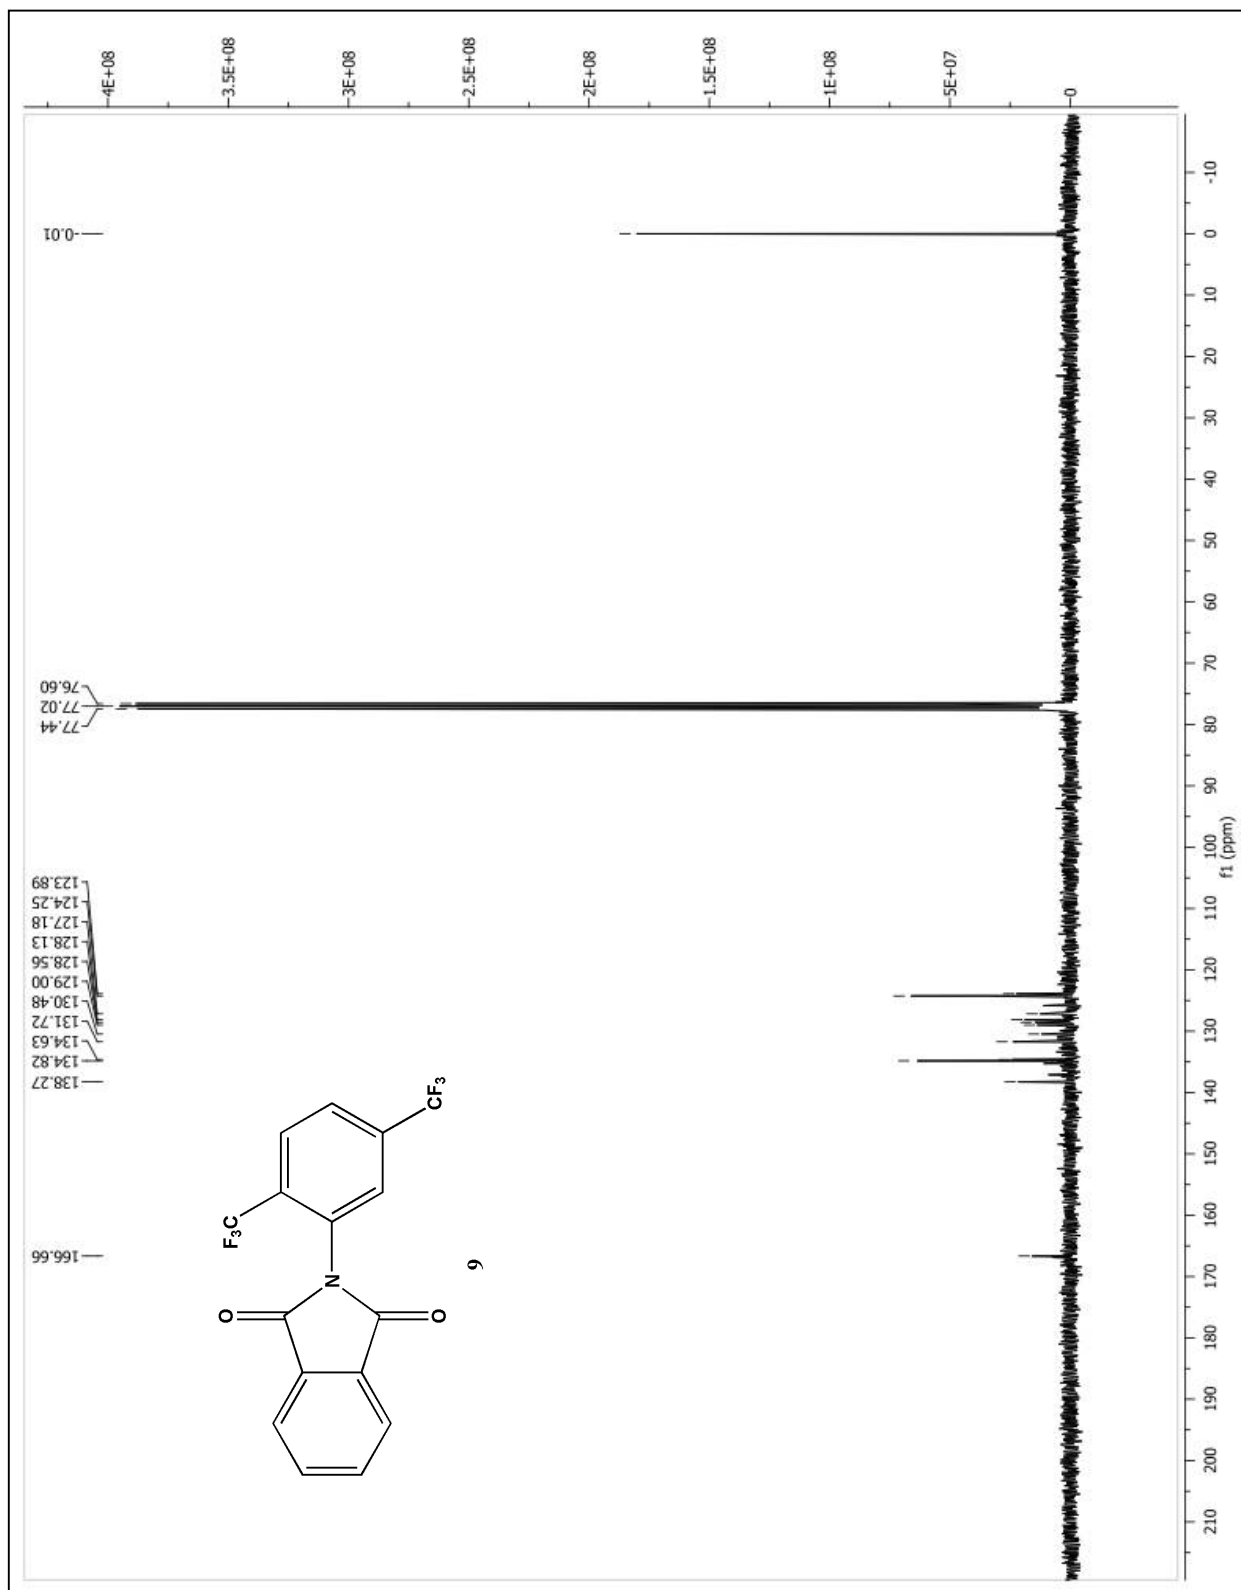

Spectra 14. <sup>13</sup>C NMR of Compound 9

### Synthesis of 2-(3, 4-dichlorophenyl) isoindoline-1,3-dione (**10**)

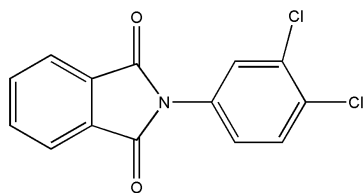

10

A magnetically stirred solution of phthalimide (0.10 g, 0.68mmol), iodobenzene diacetate (0.55 g, 1.7mmol) in 4 mL of 1,2-dichlorobenzene was microwave heated at 145 °C for 3 h. The excess solvent from the mixture is removed at reduced pressure and crude product was purified by column chromatography to give pure **10** (0.1118 g, 56 %).

***R<sub>f</sub>*-Value:** Hexane/Ethyl acetate (9:1 v/v) = 0.19.

**<sup>1</sup>H NMR (300 MHz, CDCl<sub>3</sub>):** δ = 7.37 (dd, *J* = 8.6, 2.4 Hz, 1H), 7.58 (d, *J* = 8.6 Hz, 1H), 7.64 (d, *J* = 2.4 Hz, 1H), 7.86 – 7.79 (m, 2H), 7.98 – 7.94 (m, 2H).

**<sup>13</sup>C NMR (75 MHz, CDCl<sub>3</sub>):** δ = 124.01, 125.53, 128.16, 130.70, 131.05, 131.43, 132.12, 133.02, 134.77, 166.63.

**LRMS EI (m/z):** [M<sup>+</sup>] calc'd for C<sub>14</sub>H<sub>7</sub>F<sub>2</sub>NO<sub>2</sub> 291.0, observed 291.0 m/z.



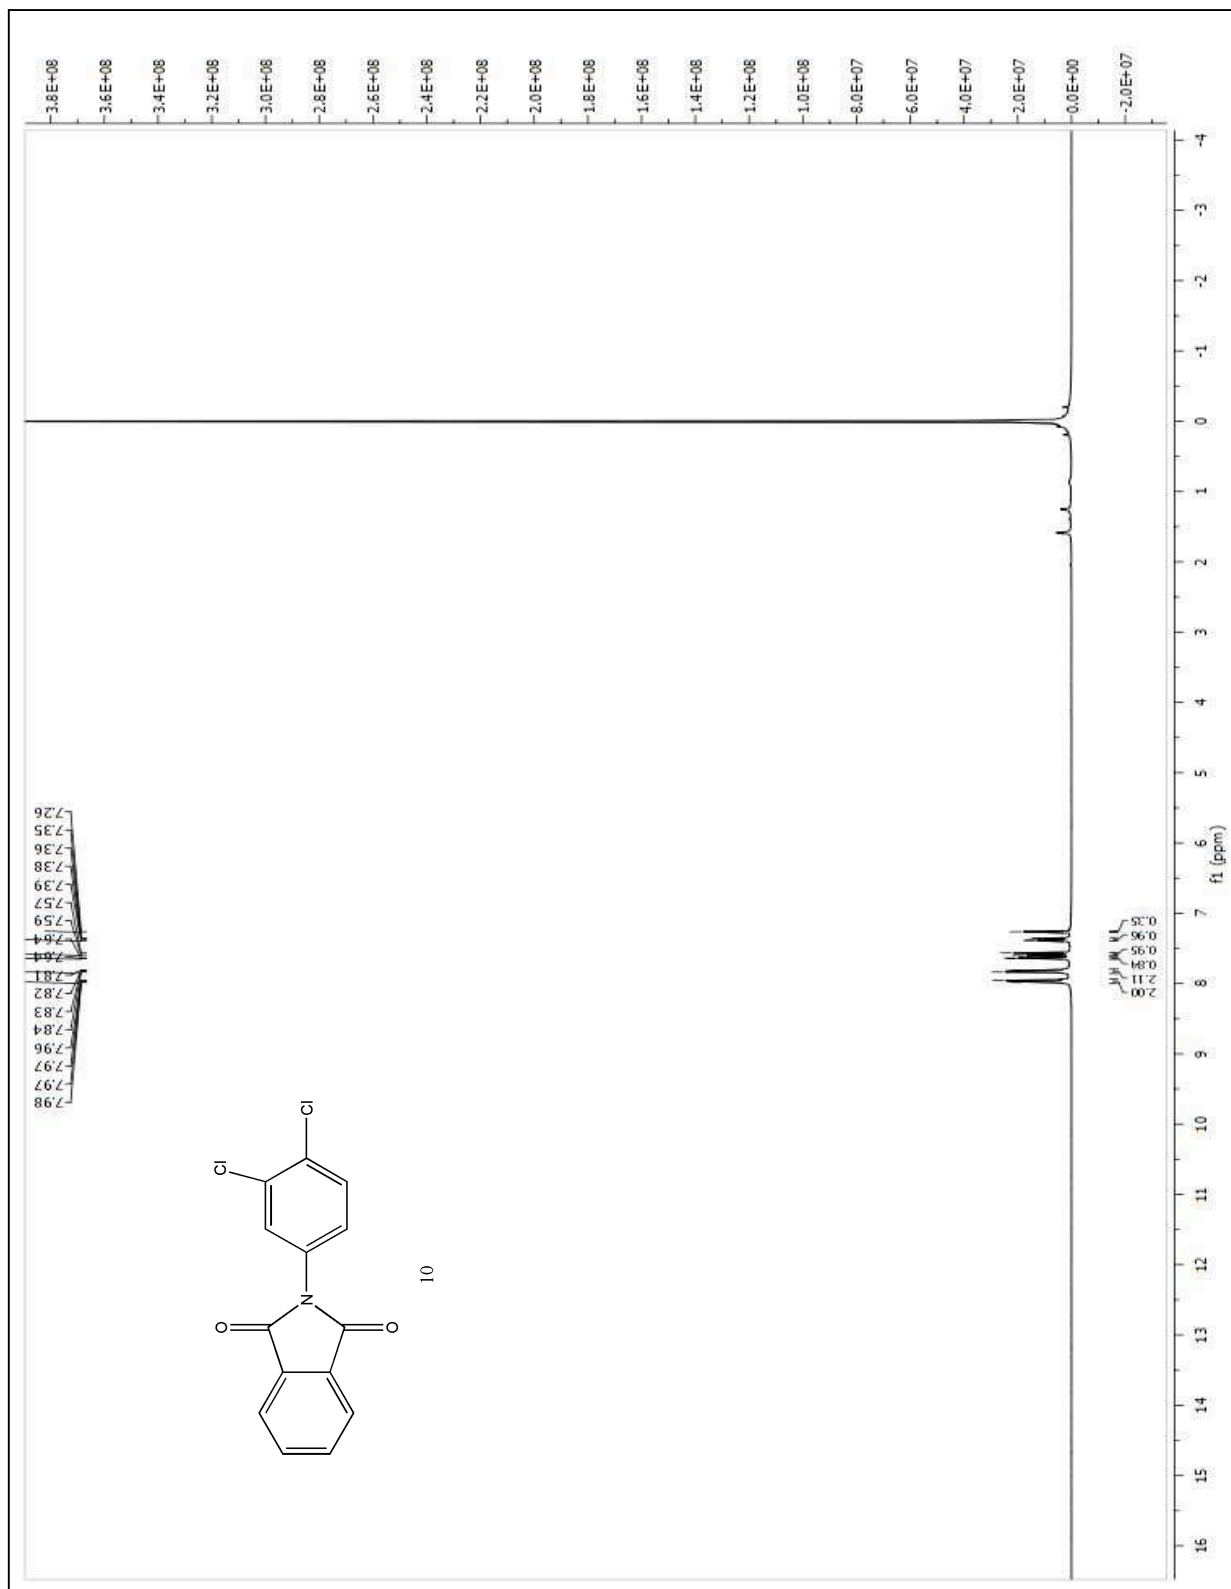

Spectra 15. <sup>1</sup>H NMR of Compound 10

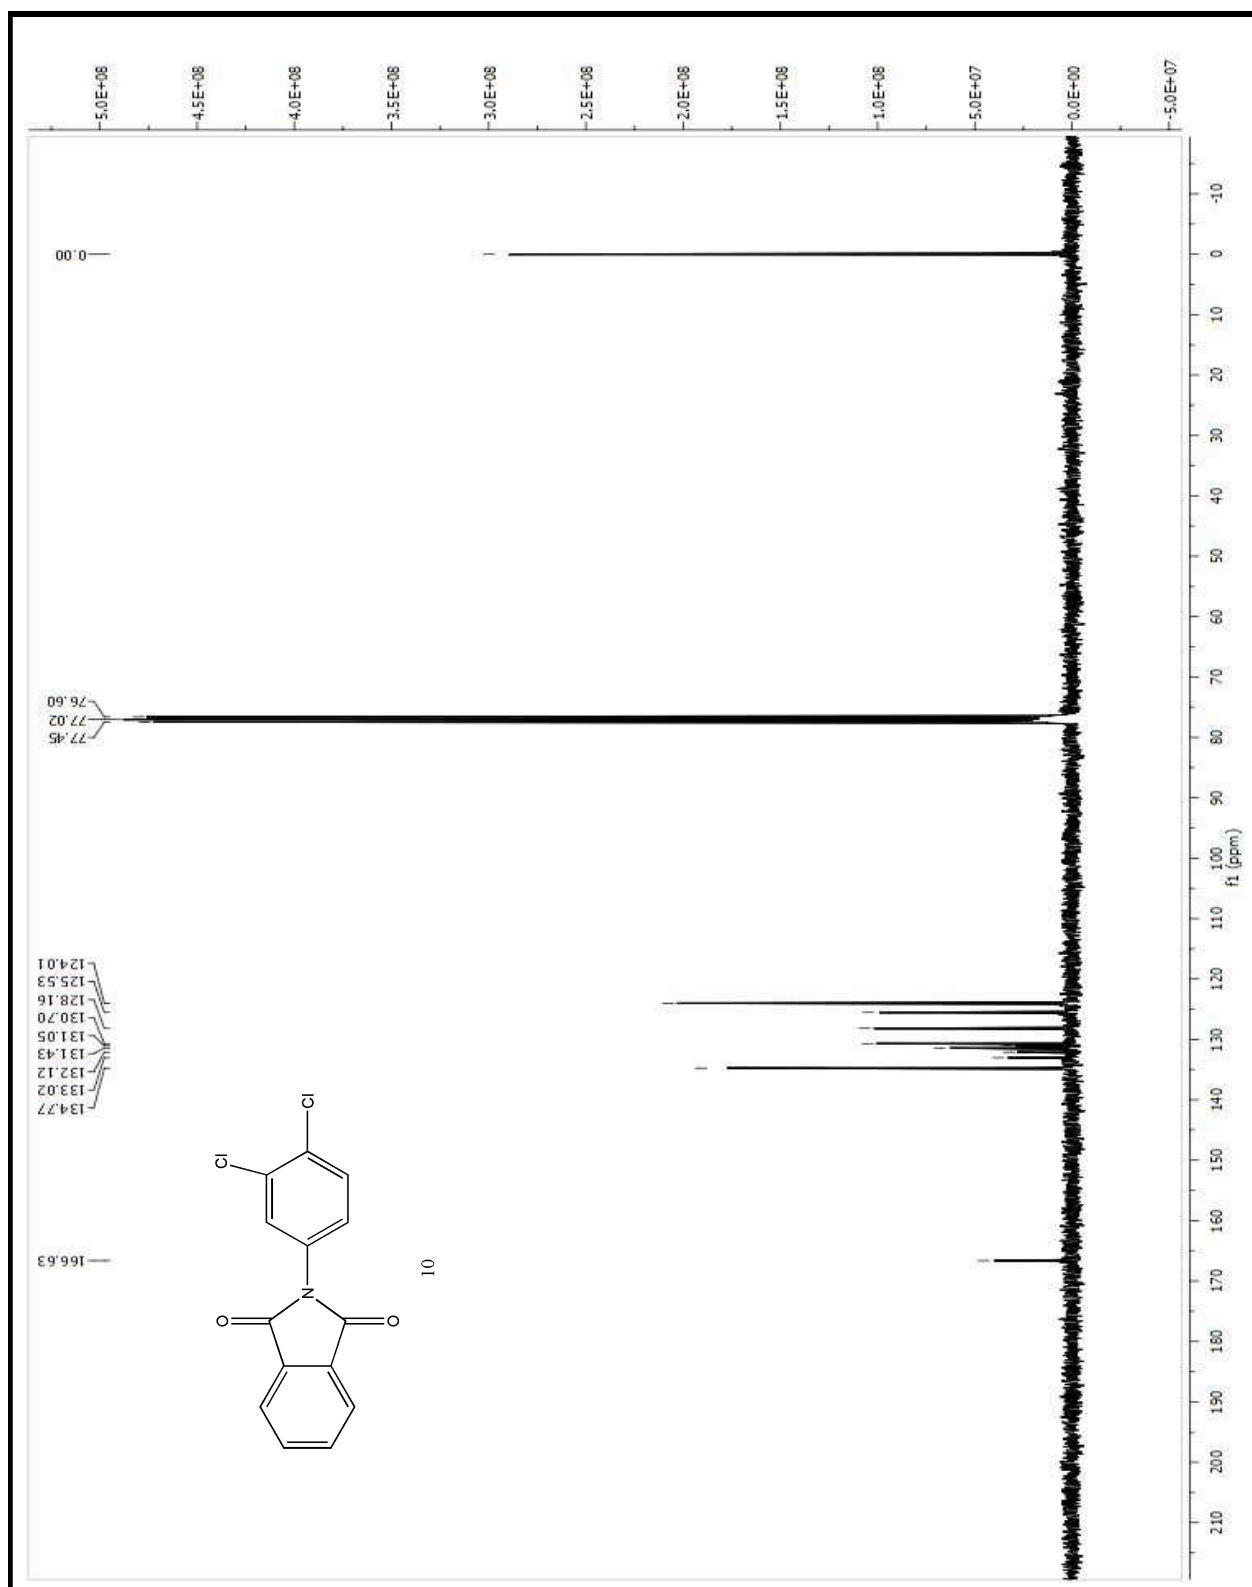

Spectra 16. <sup>13</sup>C NMR of Compound 10

### Synthesis of 2-(2,3-dichlorophenyl)isoindoline-1,3-dione ( **11** )

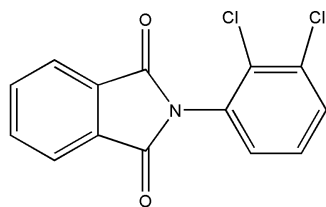

**11**

A magnetically stirred solution of Phthalimide (0.10 g, 0.68mmol), iodobenzene diacetate (0.55 g, 1.7mmol) in 4 mL of 1,2-dichlorobenzene was microwave heated at 145 °C for 3 h. The excess solvent from the mixture is removed at reduced pressure and crude product was purified by column chromatography to give pure **11** (0.034 g, 17 %).

***R<sub>f</sub>*-Value:** Hexane/Ethyl acetate (9:1 v/v) = 0.09.

**<sup>1</sup>H NMR (300 MHz, CDCl<sub>3</sub>):** δ = 7.27-7.4 (m, 2H), 7.59-7.62 (m, 1H), 7.83 (dd, *J* = 3, 3 Hz, 2H), 7.99 (dd, *J* = 3 Hz, 3 Hz, 2H).

**<sup>13</sup>C NMR (75 MHz, CDCl<sub>3</sub>):** δ = 124.11, 127.71, 128.97, 131.32, 131.49, 131.75, 132.32, 134.35, 134.66, 166.37.

**LRMS EI (m/z):** [M<sup>+</sup>] calc'd for C<sub>14</sub>H<sub>7</sub>F<sub>2</sub>NO<sub>2</sub> 291.0, observed 291.0 m/z.

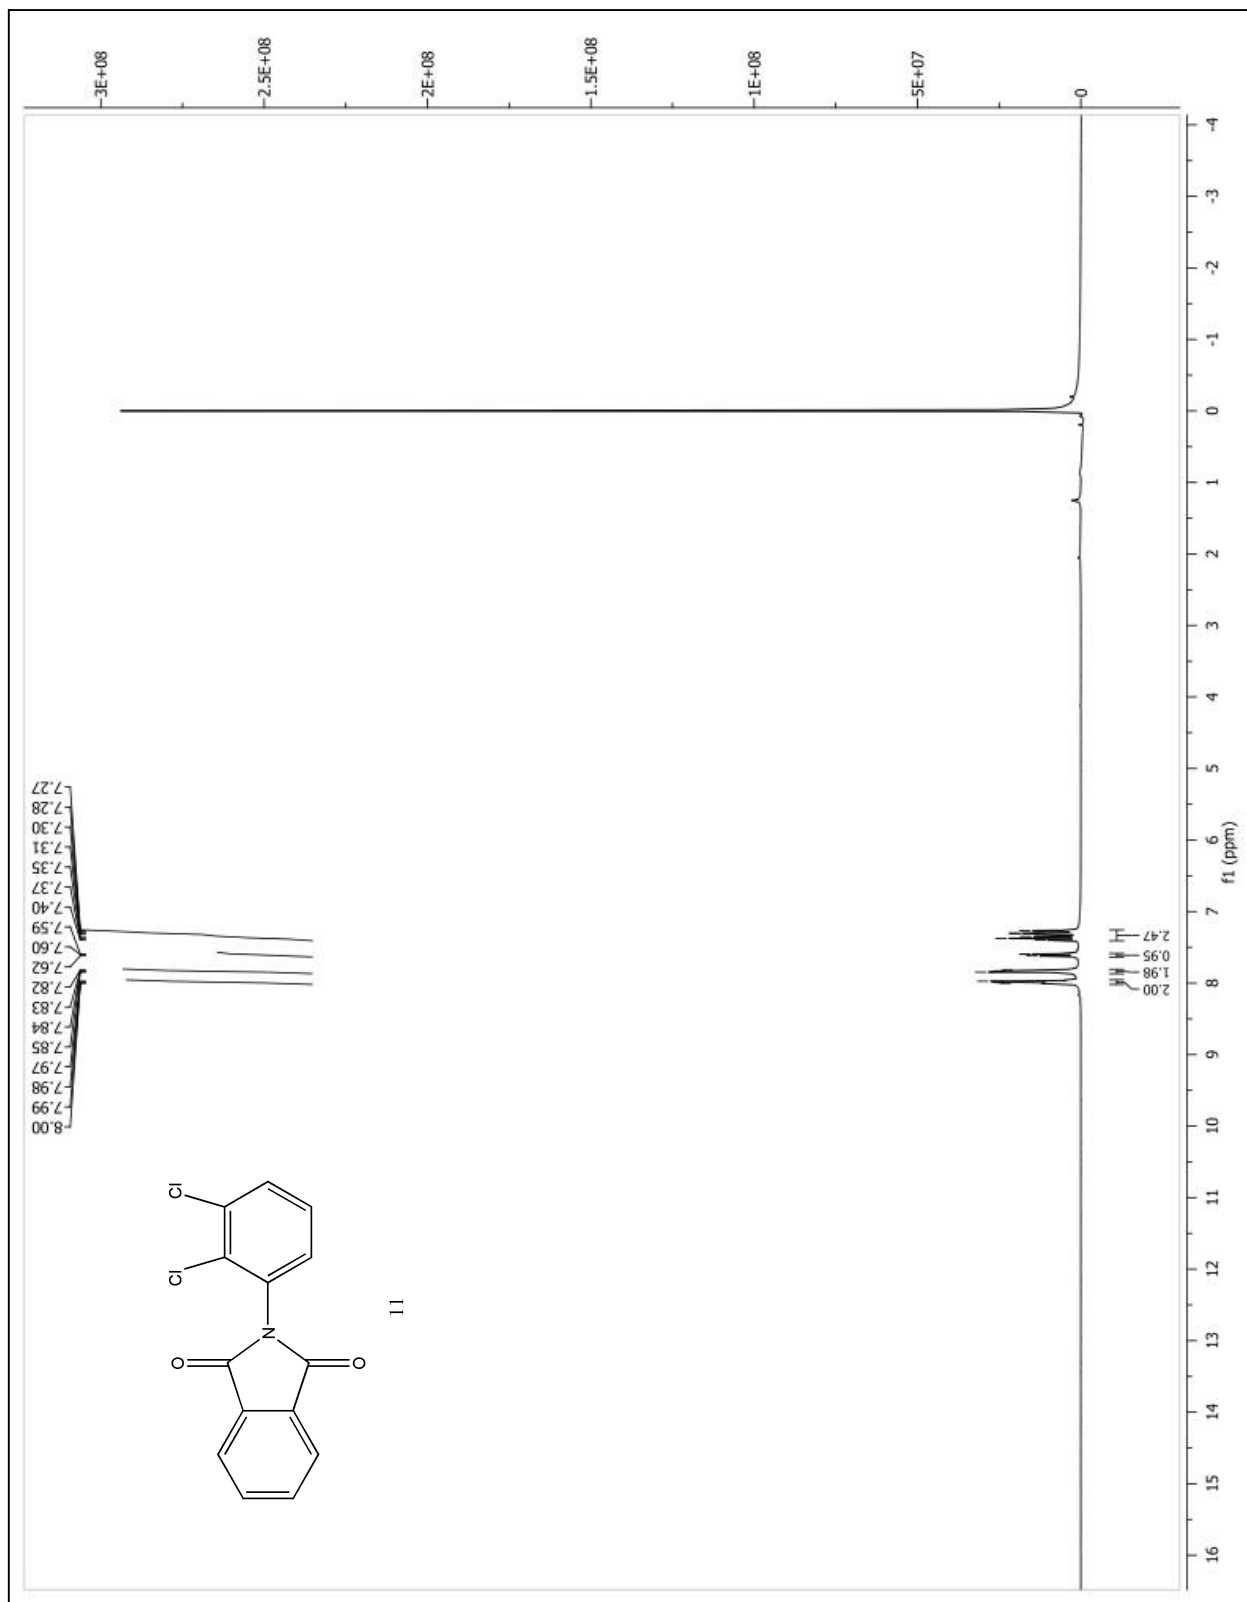

Spectra 17. <sup>1</sup>H NMR of Compound 11

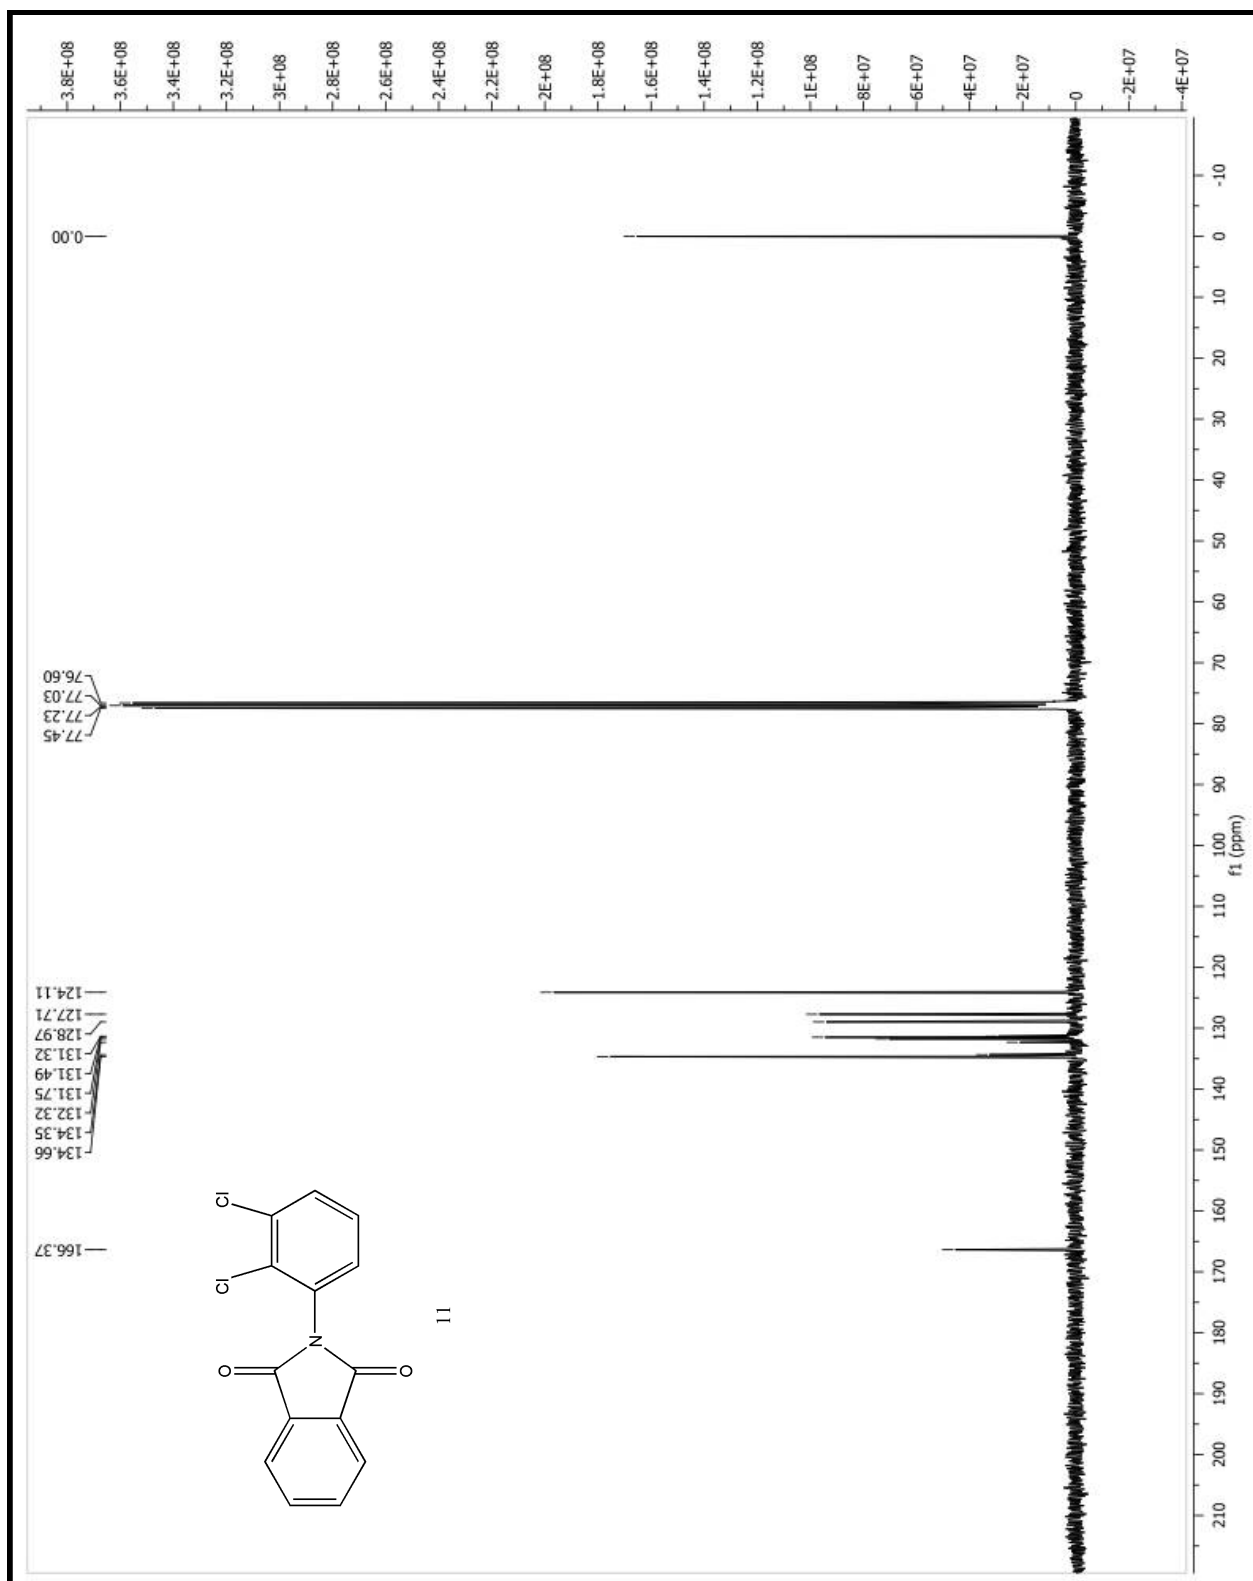

Spectra 18. <sup>13</sup>C NMR of Compound 11

## Synthesis of 14 and 15

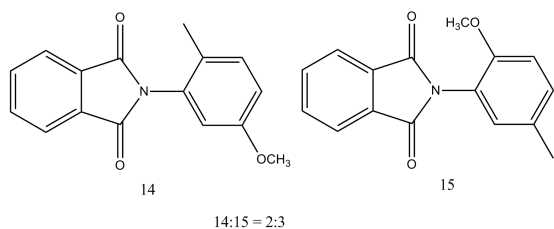

A magnetically stirred solution of phthalimide (0.10 g, 0.68mmol), iodobenzene diacetate (0.55 g, 1.7mmol) in 4 mL of 4-methylanisole was microwave heated at 145 °C for 3 h. The excess solvent from the mixture is removed at reduced pressure and crude product was purified by column chromatography to give a mixture of **14** and **15** (0.1287 g, 70 %, **14:15** = 2:3).

***R<sub>f</sub>*-Value:** Hexane/Ethyl acetate (9:1 v/v) = 0.1714.

**<sup>1</sup>H NMR (300 MHz, CDCl<sub>3</sub>):** δ = 2.13 (s, 2H), 2.34 (s, 3H), 3.78 (dd, *J* = 9.6, 2.1 Hz, 6H), 6.75 (d, *J* = 2.5 Hz, 1H), 6.95 (d, *J* = 8.4 Hz, 2H), 7.07 (s, 1H), 7.20 – 7.30 (m, 3H), 7.76-7.82 (m, 4H), 7.91 – 7.99 (m, 4H).

**<sup>13</sup>C NMR (75 MHz, CDCl<sub>3</sub>):** δ = 17.15, 20.40, 55.45, 55.91, 112.02, 113.85, 115.65, 119.75, 123.66, 123.80, 128.29, 130.38, 131.16, 131.70, 131.96, 132.24, 134.10, 134.36, 153.22, 158.27, 167.30, 167.53.

**LRMS EI (m/z):** [M<sup>+</sup>] calc'd for C<sub>14</sub>H<sub>9</sub>NO<sub>2</sub> 267.09, observed 267.10 m/z.



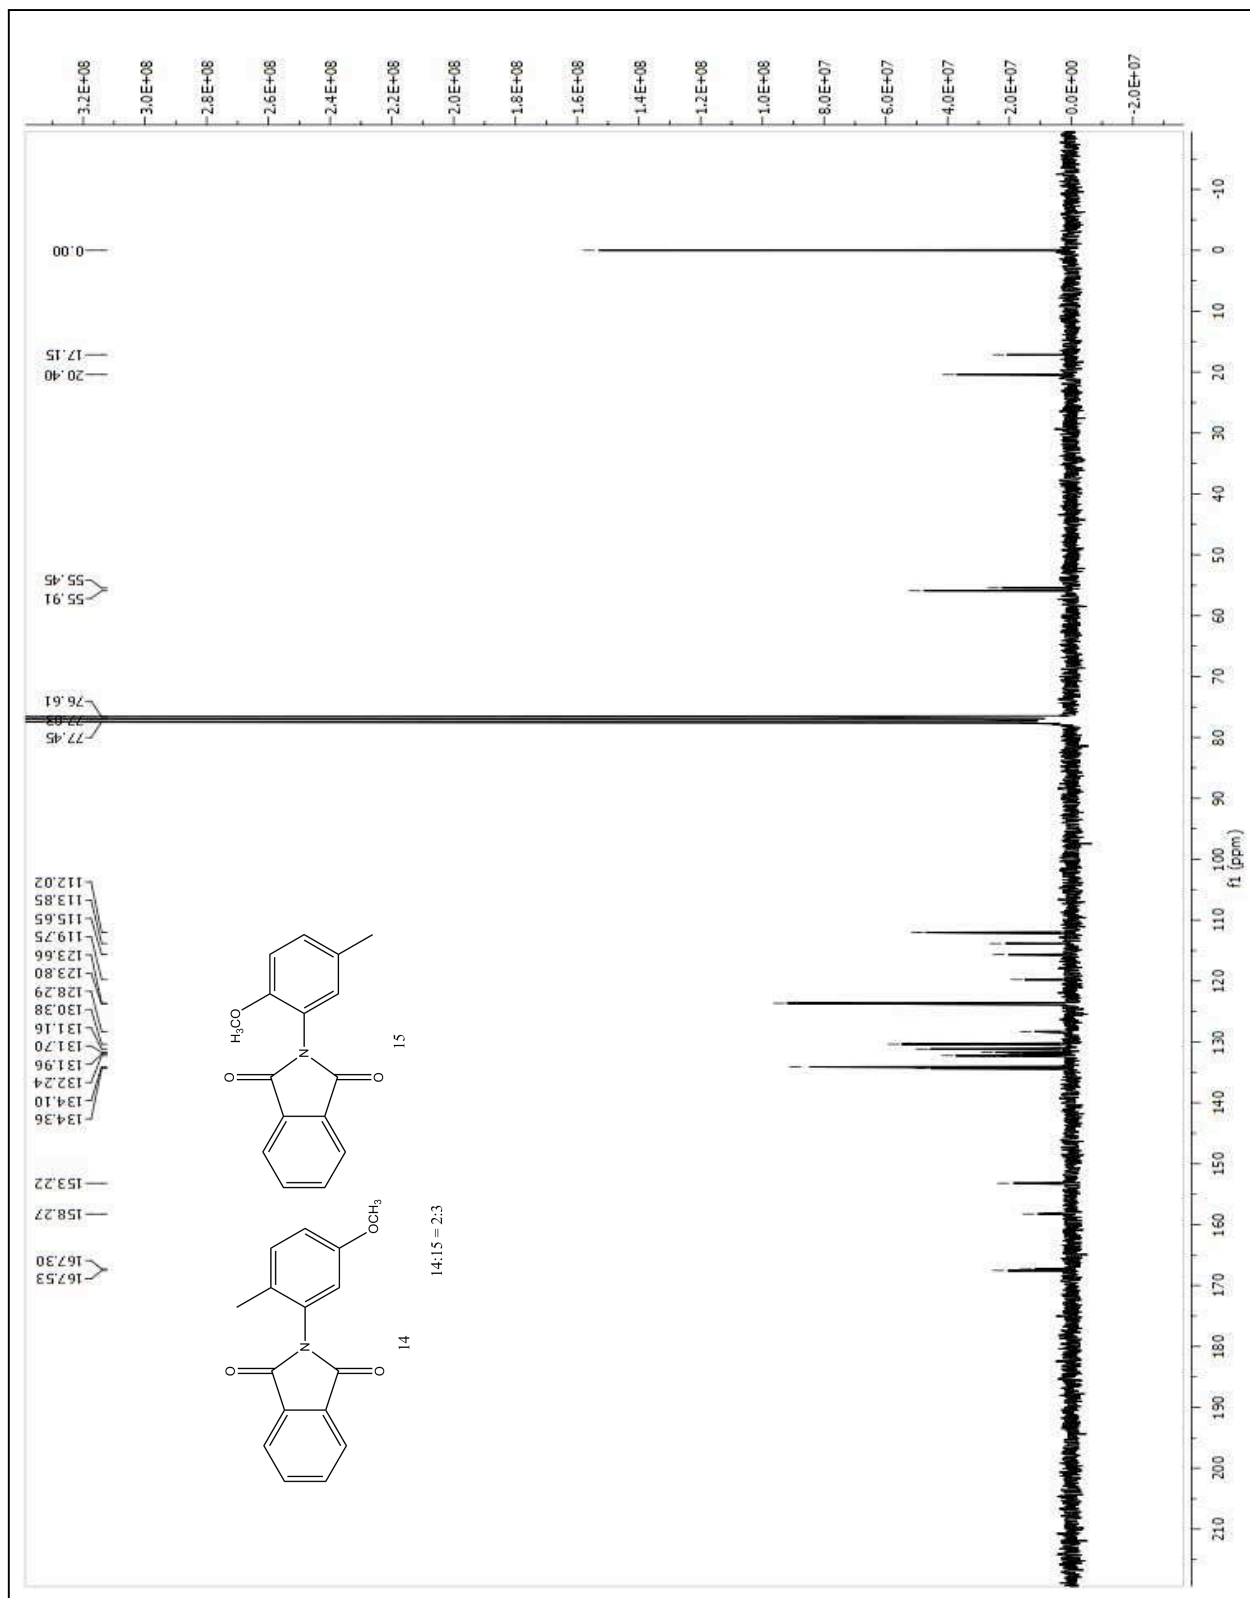

Spectra 20.  $^{13}\text{C}$  NMR of Compound 14 and 15



### Synthesis of 2-(5-tert-butyl-2-methoxyphenyl) isoindoline-1,3-dione (**16**)

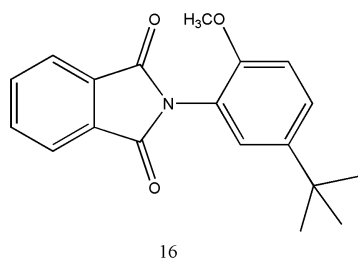

A magnetically stirred solution of phthalimide (0.10 g, 0.68mmol), iodobenzene diacetate (0.55 g, 1.7mmol), 1-*tert*-butyl-4-methoxybenzene (0.22 g, 1.359 mmol) in 4 mL of acetonitrile was microwave heated at 145 °C for 3 h. The excess solvent from the mixture is removed at reduced pressure and crude product was purified by column chromatography to give pure **16** (0.117 g, 56 %).

***R<sub>f</sub>*-Value:** Hexane/Ethyl acetate (9:1 v/v) = 0.11.

**<sup>1</sup>H NMR (300 MHz, CDCl<sub>3</sub>):**  $\delta$  = 1.29-1.32 (m, 9H), 3.77 (s, 3H), 6.98 (d,  $J$  = 9 Hz, 1H), 7.25 (m, 1H), 7.44 (dd,  $J$  = 3 Hz, 3 Hz, 1 H) 7.77 (dd,  $J$  = 3 Hz, 3 Hz, 2H), 7.94 (dd,  $J$  = 3 Hz, 3 Hz, 2H).

**<sup>13</sup>C NMR (75 MHz, CDCl<sub>3</sub>):**  $\delta$  = 31.42, 34.17, 55.87, 111.64, 119.51, 123.61, 126.98, 132.29, 134.06, 143.74, 153.05, 167.55.

**LRMS EI (m/z):** [M<sup>+</sup>] calc'd for C<sub>19</sub>H<sub>19</sub>NO<sub>3</sub> 309.14, observed 309.12 m/z.

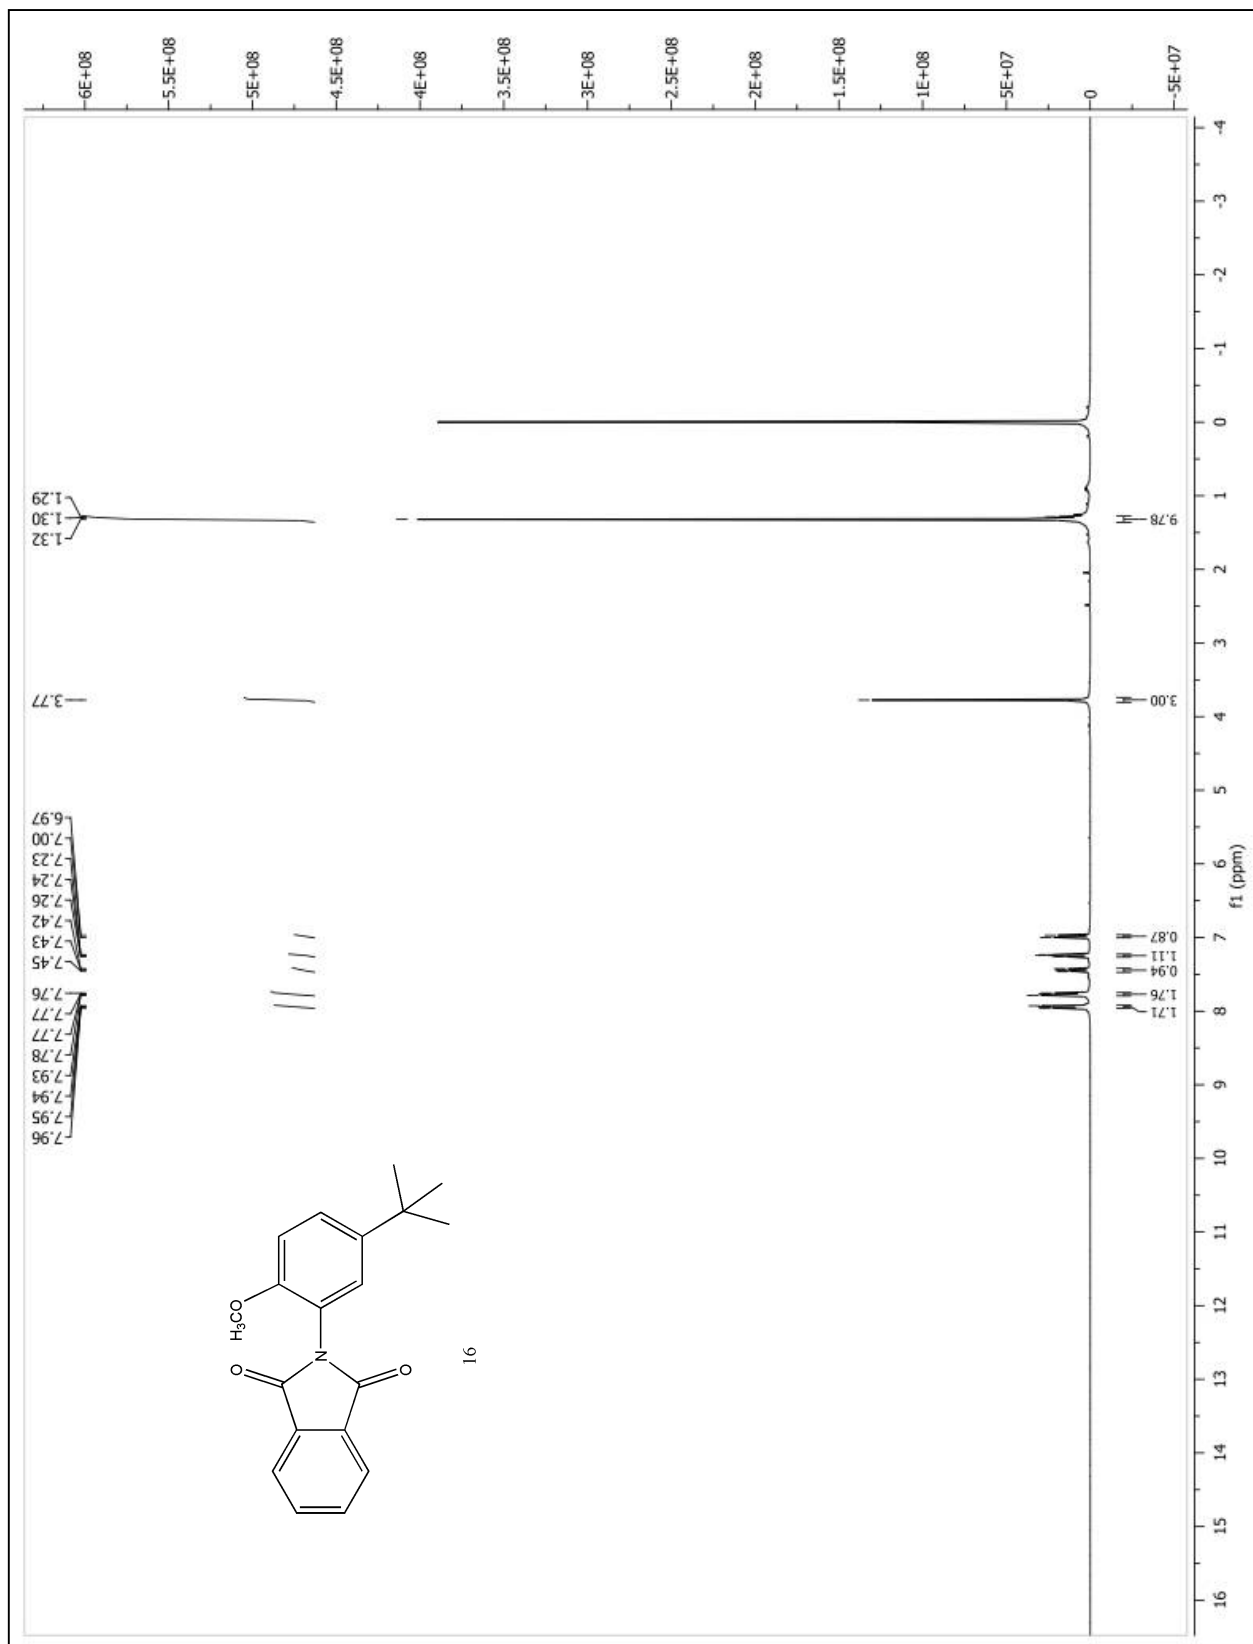

Spectra 21. <sup>1</sup>H NMR of Compound 16

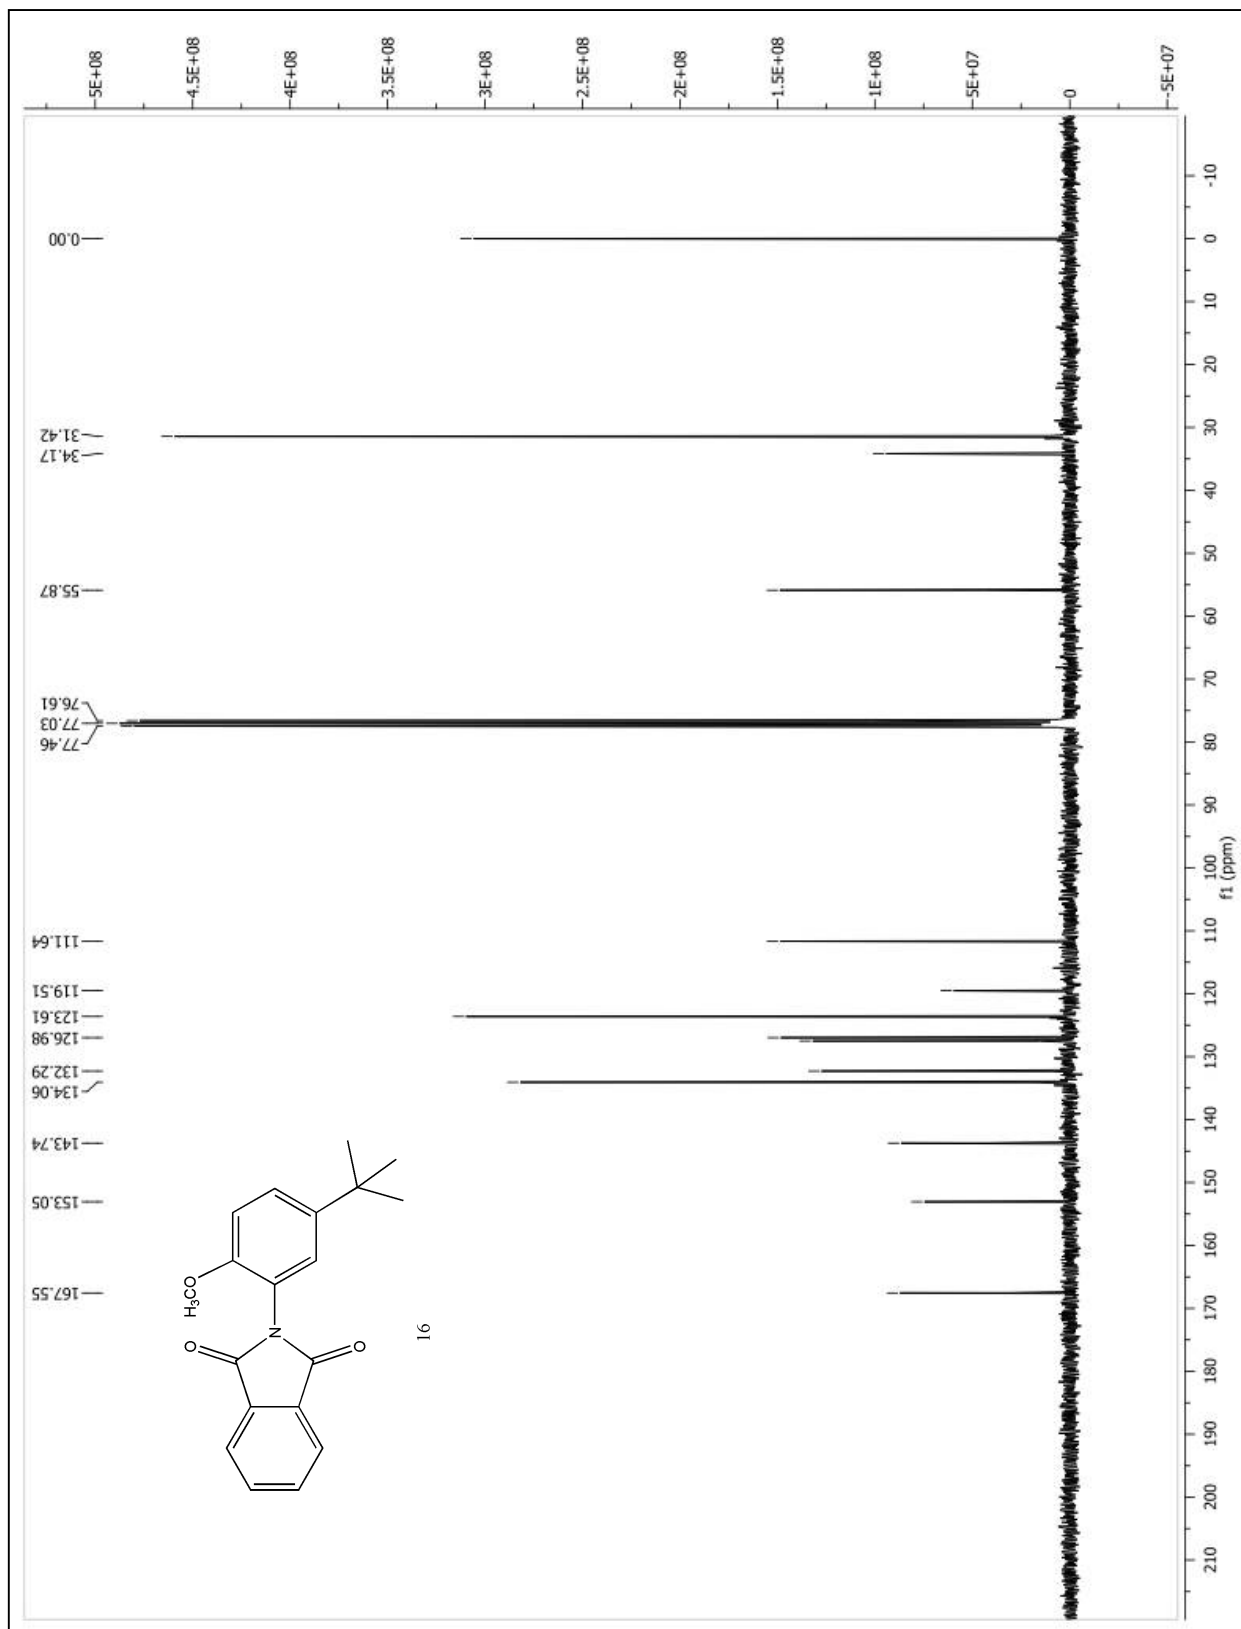

Spectra 22. <sup>13</sup>C NMR of Compound 16

## Synthesis of **12** and **13**

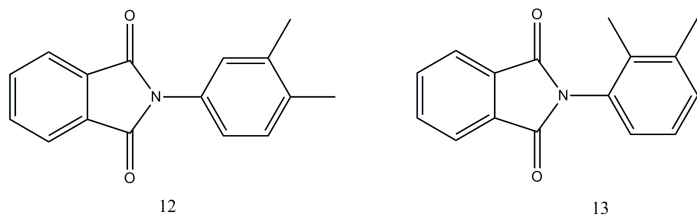

12:13 = 3:4

A magnetically stirred solution of phthalimide (0.10 g, 0.68mmol), iodobenzene diacetate (0.55 g, 1.7mmol) in 4 mL of *o*-xylene was microwave heated at 145 °C for 3 h. The excess solvent from the mixture is removed at reduced pressure and crude product was purified by column chromatography to give a mixture of **12** and **13** (0.1333 g, 80 %, **12:13** = 3:4).

***R<sub>f</sub>*-Value:** Hexane/Ethyl acetate (9:1 v/v) = 0.22.

**<sup>1</sup>H NMR (300 MHz, CDCl<sub>3</sub>):** δ = 2.08 (s, 3H), 2.31 (s, 5H), 2.35 (s, 3H), 7.23 – 7.28 (m, 7H), 7.76 – 7.81 (m, 4H), 7.93-7.98 (m, 4H).

**<sup>13</sup>C NMR (75 MHz, CDCl<sub>3</sub>):** δ = 14.67, 19.55, 19.91, 20.45, 123.67, 123.77, 124.16, 126.28, 127.76, 129.12, 130.29, 130.48, 131.00, 131.88, 132.06, 134.29, 135.13, 137.07, 137.66, 138.43, 167.57.

**LRMS EI (m/z):** [M<sup>+</sup>] calc'd for C<sub>14</sub>H<sub>9</sub>NO<sub>2</sub> 251.09, observed 251.10 m/z.

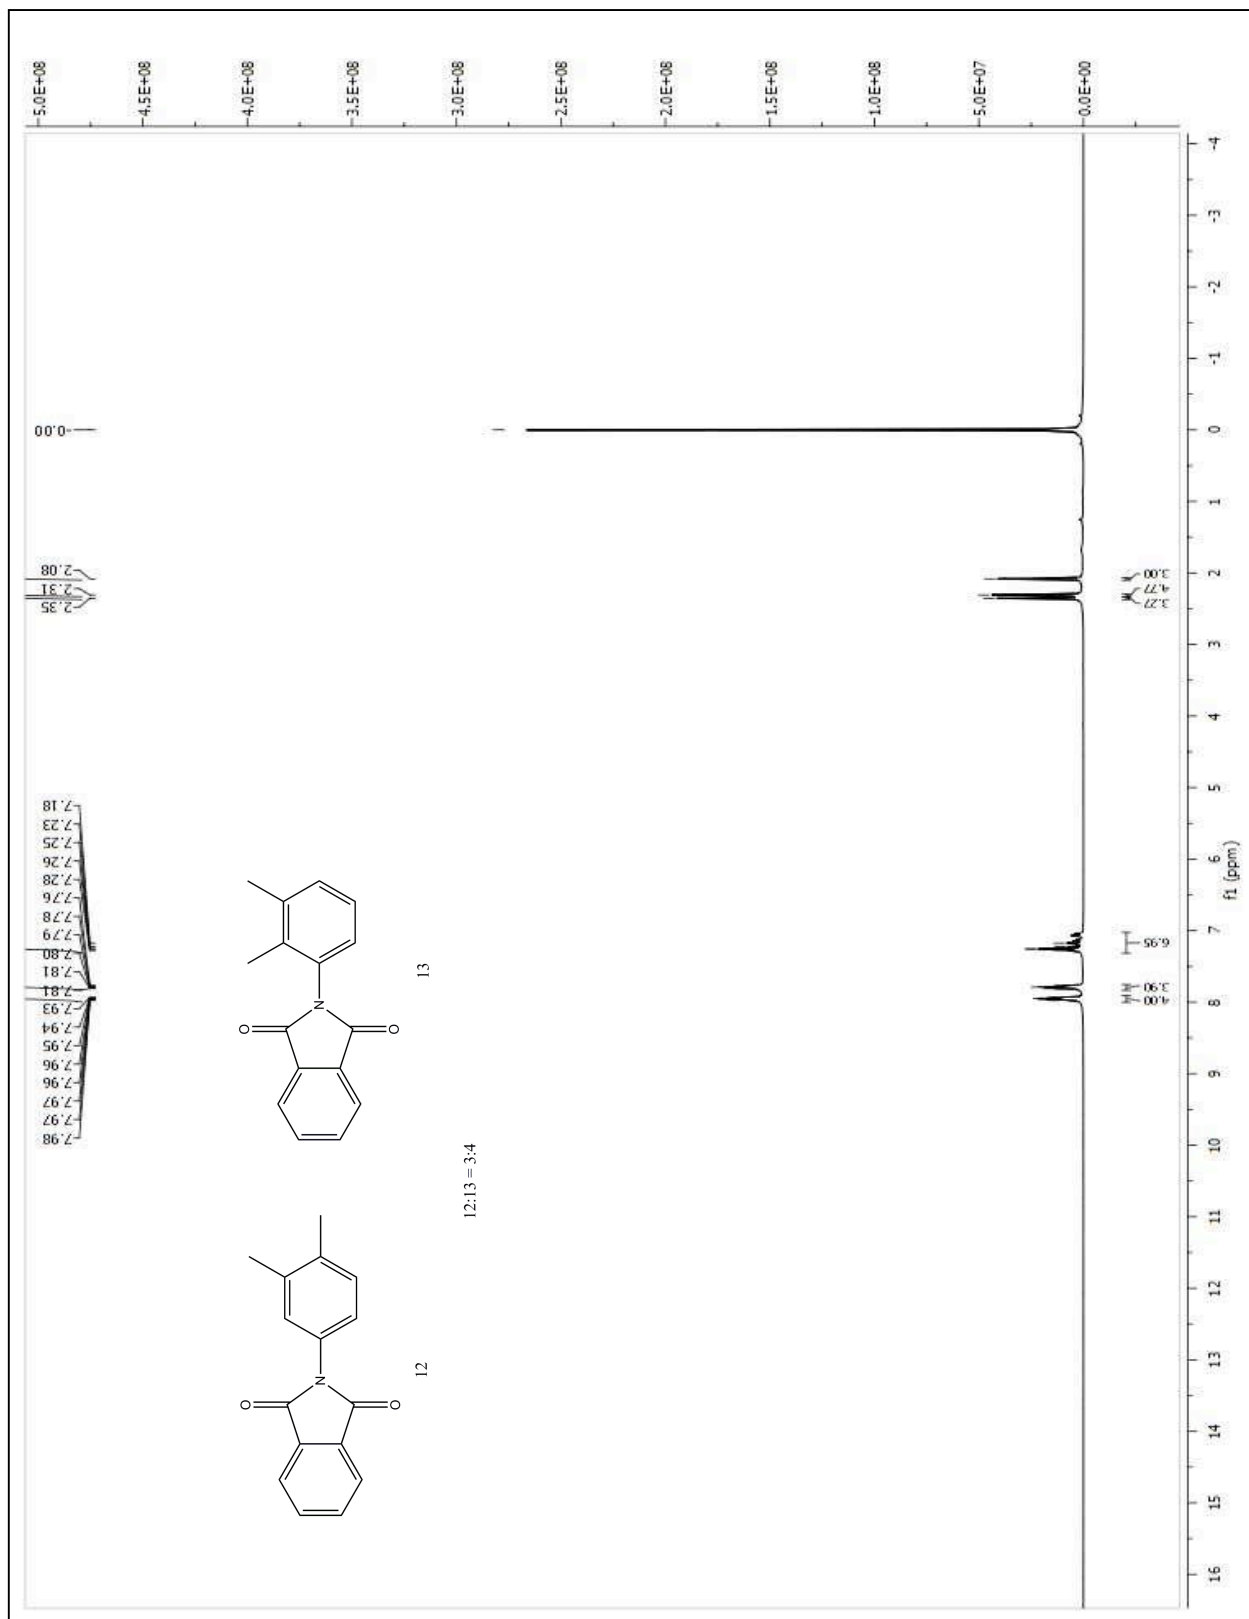

Spectra 23.  $^1\text{H}$  NMR of Compound 12 and 13

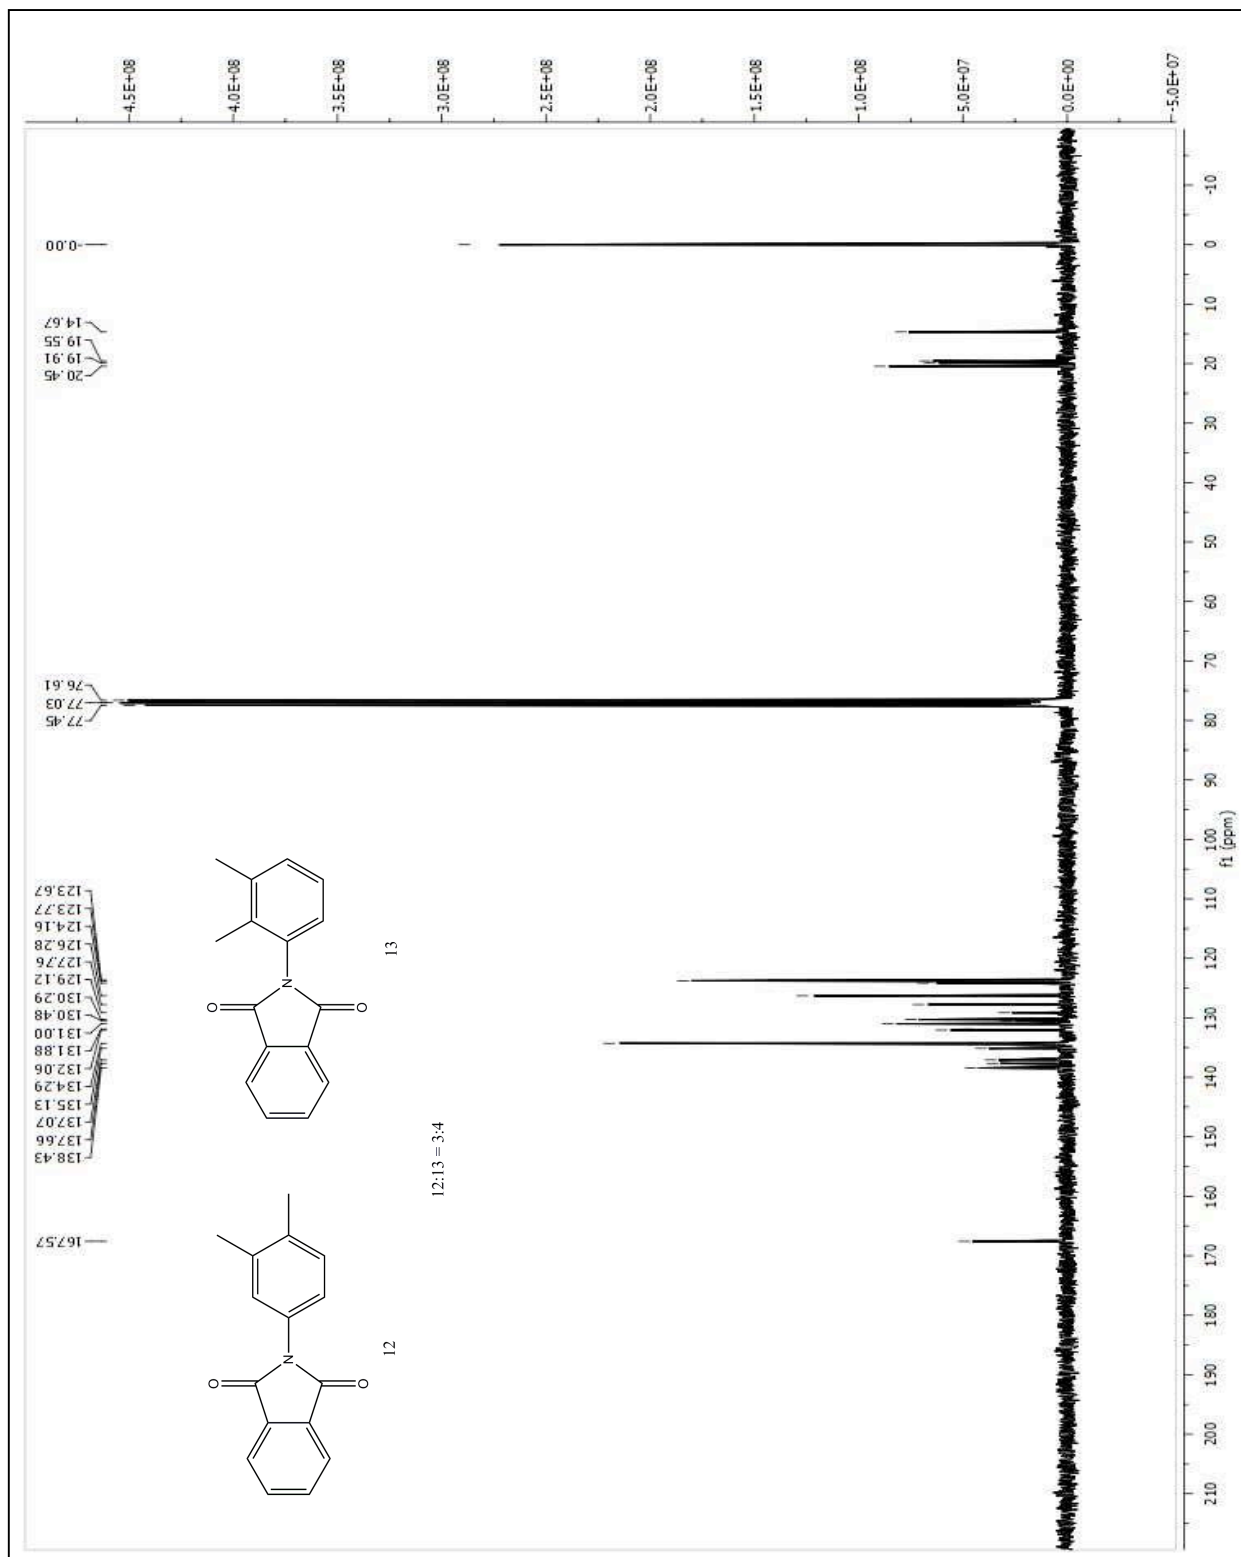

Spectra 24.  $^{13}\text{C}$  NMR of Compound 12 and 13

## Synthesis of 17, 18, 19

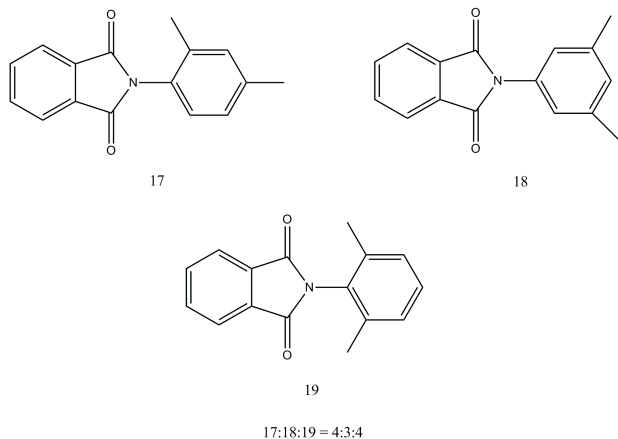

A magnetically stirred solution of phthalimide (0.10 g, 0.68mmol), iodobenzene diacetate (0.55 g, 1.7mmol) in 4 mL of *m*-xylene was microwave heated at 145 °C for 3 h. The excess solvent from the mixture is removed at reduced pressure and crude product was purified by column chromatography to give a mixture of 17, 18 and 19 (0.128 g, 75%, 17:18:19 = 4:3:4).

***R<sub>f</sub>*-Value:** Hexane/Ethyl acetate (9:1 v/v) = 0.1666.

**<sup>1</sup>H NMR (300 MHz, CDCl<sub>3</sub>):** δ = 2.17 (s, 9H), 2.38 (s, 7H), 7.32 – 6.99 (m, 11H), 7.76 – 7.84 (m, 6H), 7.92 – 8.00 (m, 6H).

**<sup>13</sup>C NMR (75 MHz, CDCl<sub>3</sub>):** δ = 17.94, 18.09, 21.21, 21.31, 123.73, 123.79, 124.52, 127.65, 127.85, 128.45, 128.49, 129.48, 130.16, 131.91, 132.07, 134.26, 134.33, 136.16, 136.86, 138.93, 139.50, 167.55.

**LRMS EI (m/z):** [M<sup>+</sup>] calc'd for C<sub>14</sub>H<sub>9</sub>NO<sub>2</sub> 251.09, observed 251.10 m/z.

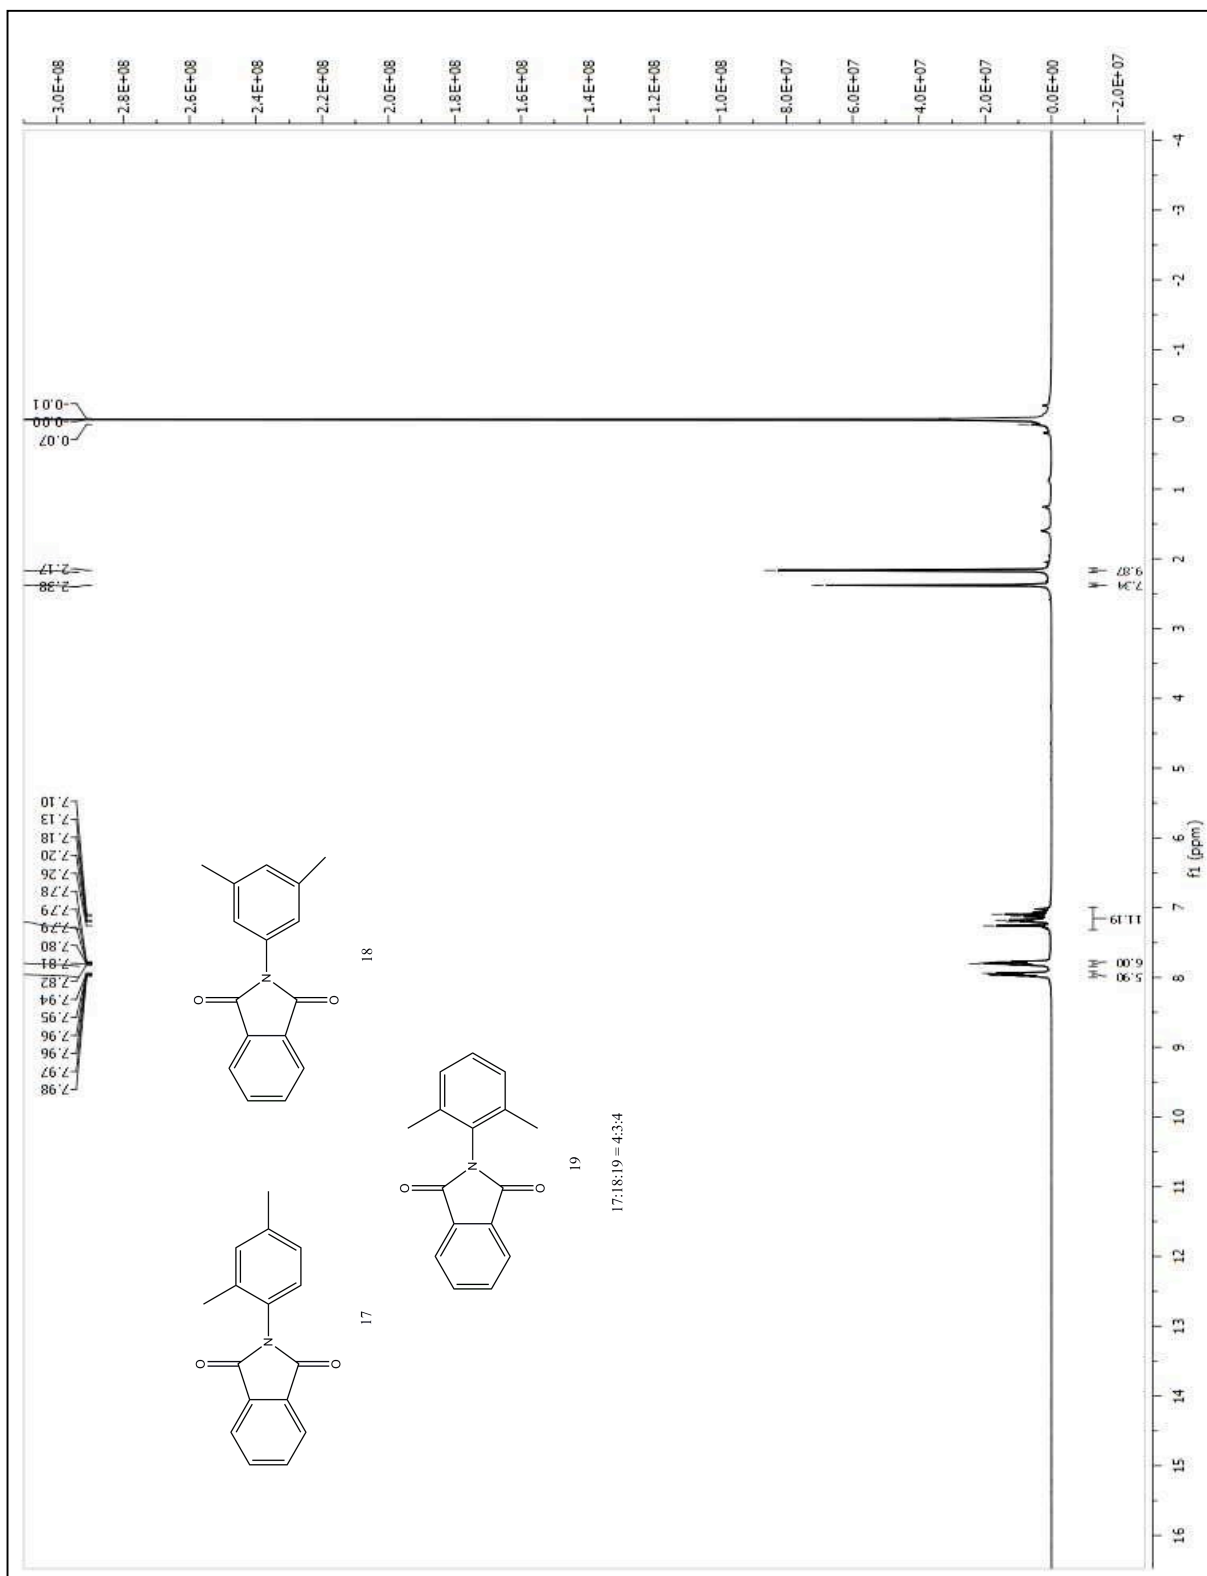

Spectra 25. <sup>1</sup>H NMR of Compound 17, 18, 19



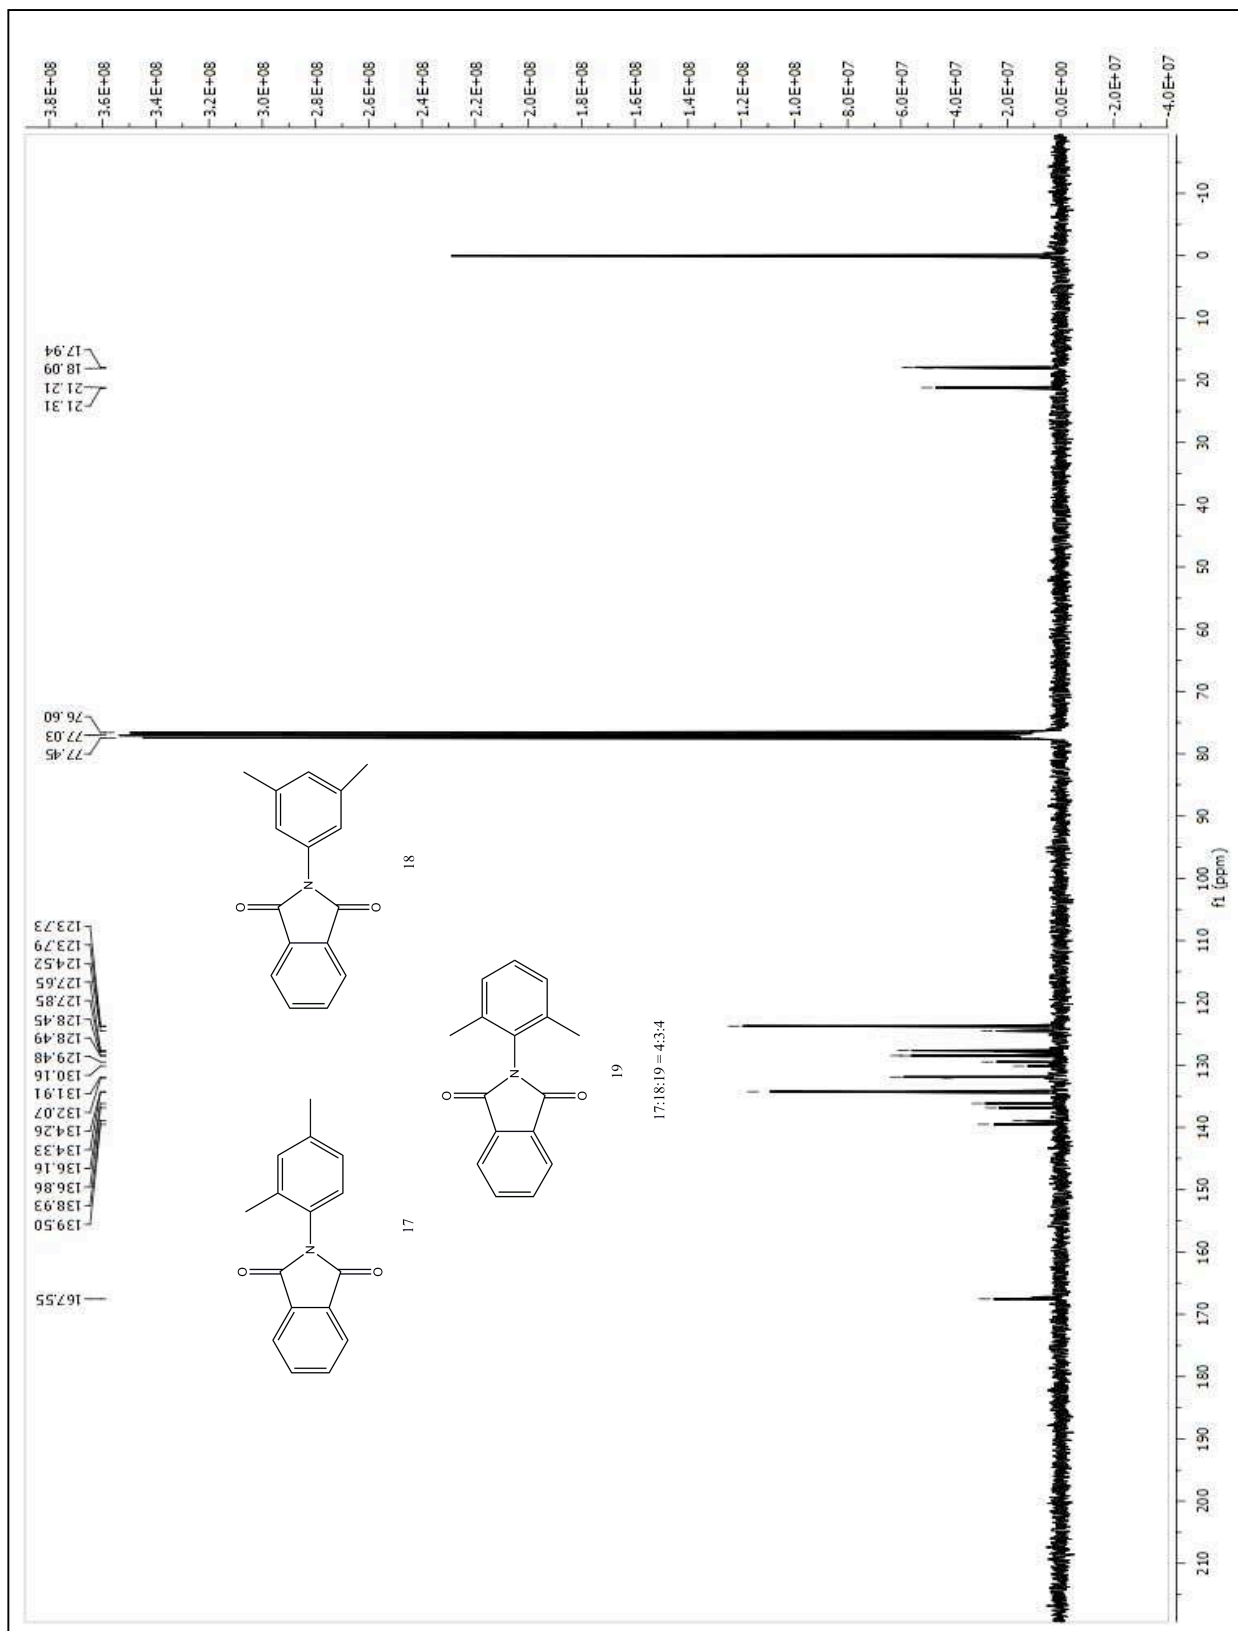

Spectra 26. <sup>13</sup>C NMR of Compound 17, 18, 19

### Synthesis of 1-phenylpyrrolidine-2,5-dione (20)

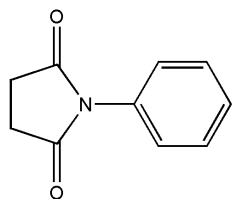

20

A magnetically stirred solution of succinimide (0.10 g, 1.009 mmol), iodobenzene diacetate (0.81 g, 2.522 mmol), in 4 mL of benzene was microwave heated at 145 °C for 3 h. The excess solvent from the mixture is removed at reduced pressure and the crude product was purified by column chromatography to give pure **20** (0.0982 g, 83 %). The NMR spectra matched with that of previously published.<sup>1</sup>

***R<sub>f</sub>*-Value:** Hexane/Ethyl acetate (1:1 v/v) = 0.44.

**<sup>1</sup>H NMR (400 MHz, CDCl<sub>3</sub>):** δ = 2.9 (s, 4H), 7.28 (d, *J* = 7.2 Hz, 2H), 7.39-7.4 (m, 1H), 7.49-7.5 (m, 2H).

**<sup>13</sup>C NMR (100 MHz, CDCl<sub>3</sub>):** δ = 28.4, 126.4, 128.6, 129.2, 131.8, 176.2.

**LRMS EI (m/z):** [M<sup>+</sup>] calc'd for C<sub>10</sub>H<sub>9</sub>NO<sub>2</sub> 175.06, observed 175.10 m/z.

### Synthesis of 1-phenylpyrrolidin-2-one (21)

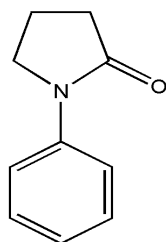

21

A magnetically stirred solution of 2-pyrrolidinone (0.10 g, 1.1749 mmol), (Diacetoxyiodo) benzene (0.95 g, 2.937 mmol), in 4 mL of benzene was microwave heated at 145 °C for 3h. The excess solvent from the mixture is removed at reduced pressure and the crude product was purified by column chromatography to give pure **21** 0.0303 g (16 %)

***R<sub>f</sub>*-Value:** Hexane/Ethyl acetate (1:1 v/v) = 0.45.

**<sup>1</sup>H NMR (300 MHz, CDCl<sub>3</sub>):** δ = 2.16 (m, 2H), 2.61 (t, *J* = 15 Hz, 2H), 3.87 (t, *J* = 15 Hz, 2H), 7.15-7.62 (m, 5H).

**<sup>13</sup>C NMR (75 MHz, CDCl<sub>3</sub>):** δ = 18.03, 32.77, 48.79, 119.94, 124.50, 128.81, 139.35, 174.26.

**LRMS EI (m/z):** [M<sup>+</sup>] calc'd for C<sub>10</sub>H<sub>11</sub>NO<sub>2</sub>, 161.08, observed 161.10 m/z.

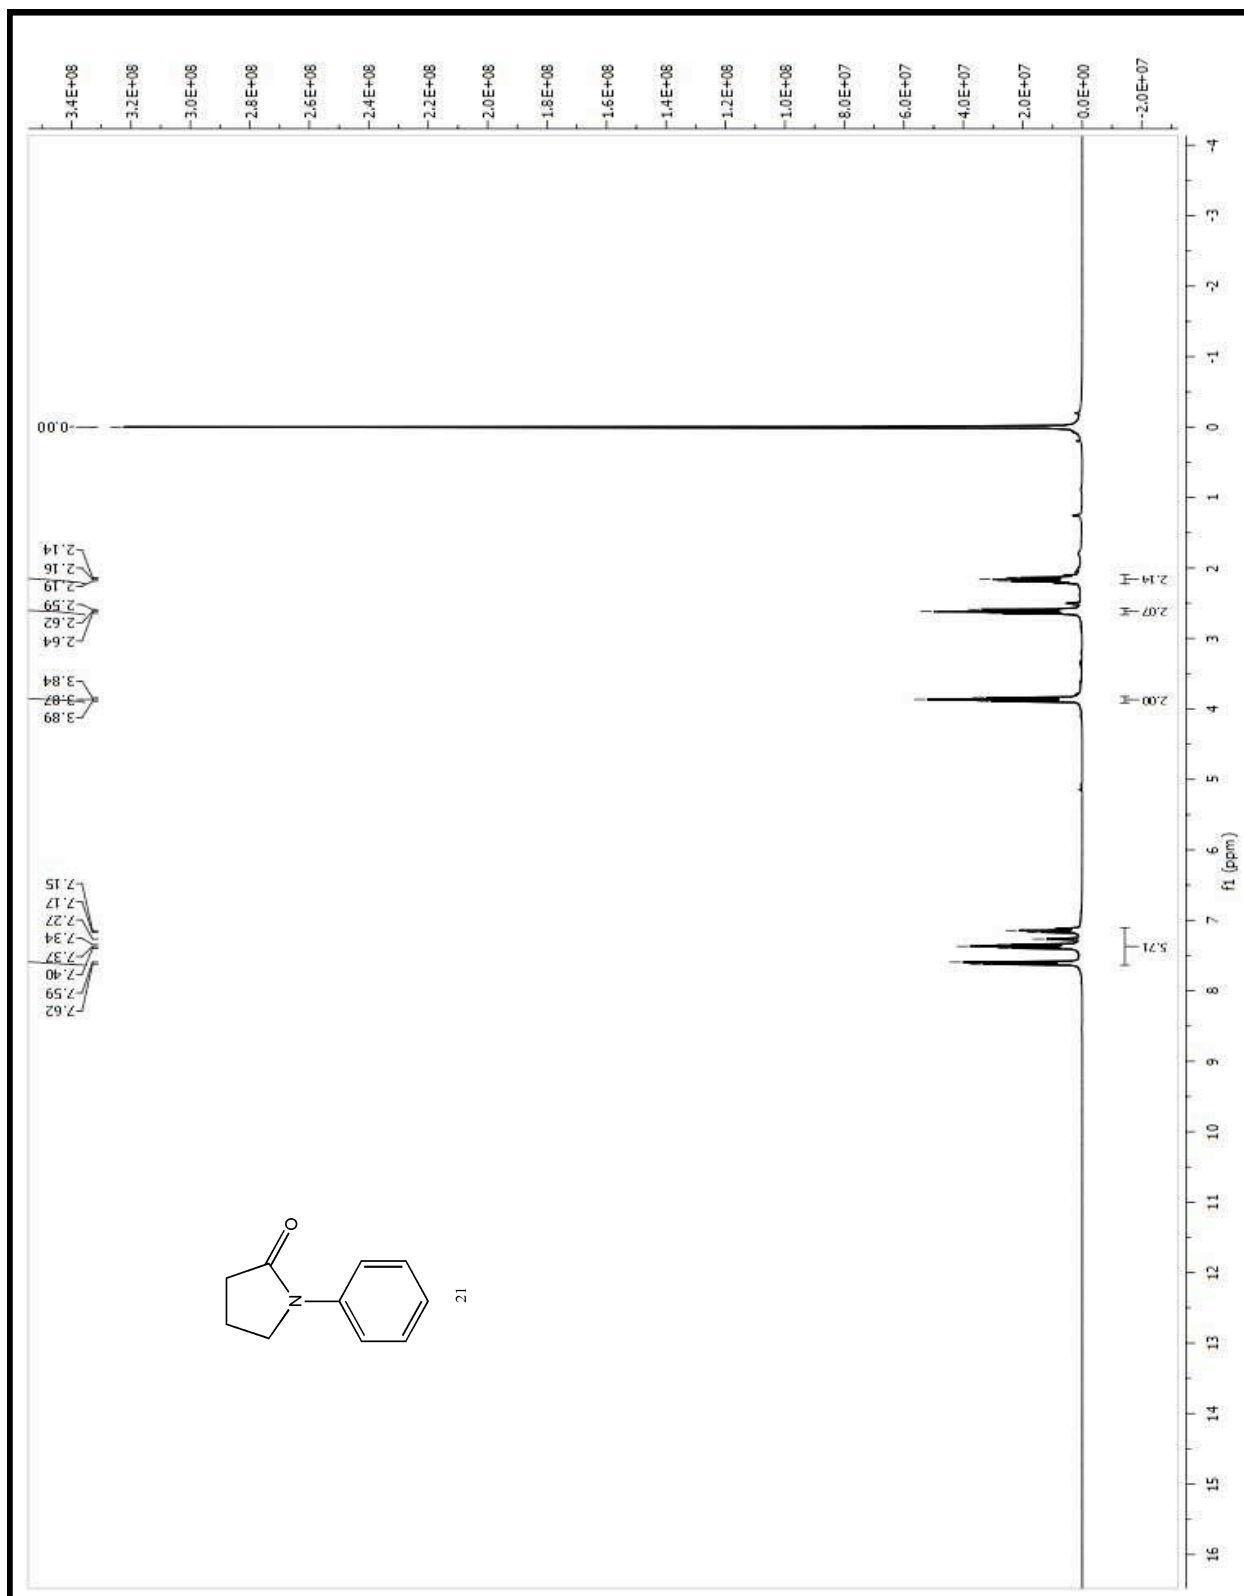

Spectra 27. <sup>1</sup>H NMR of Compound 21

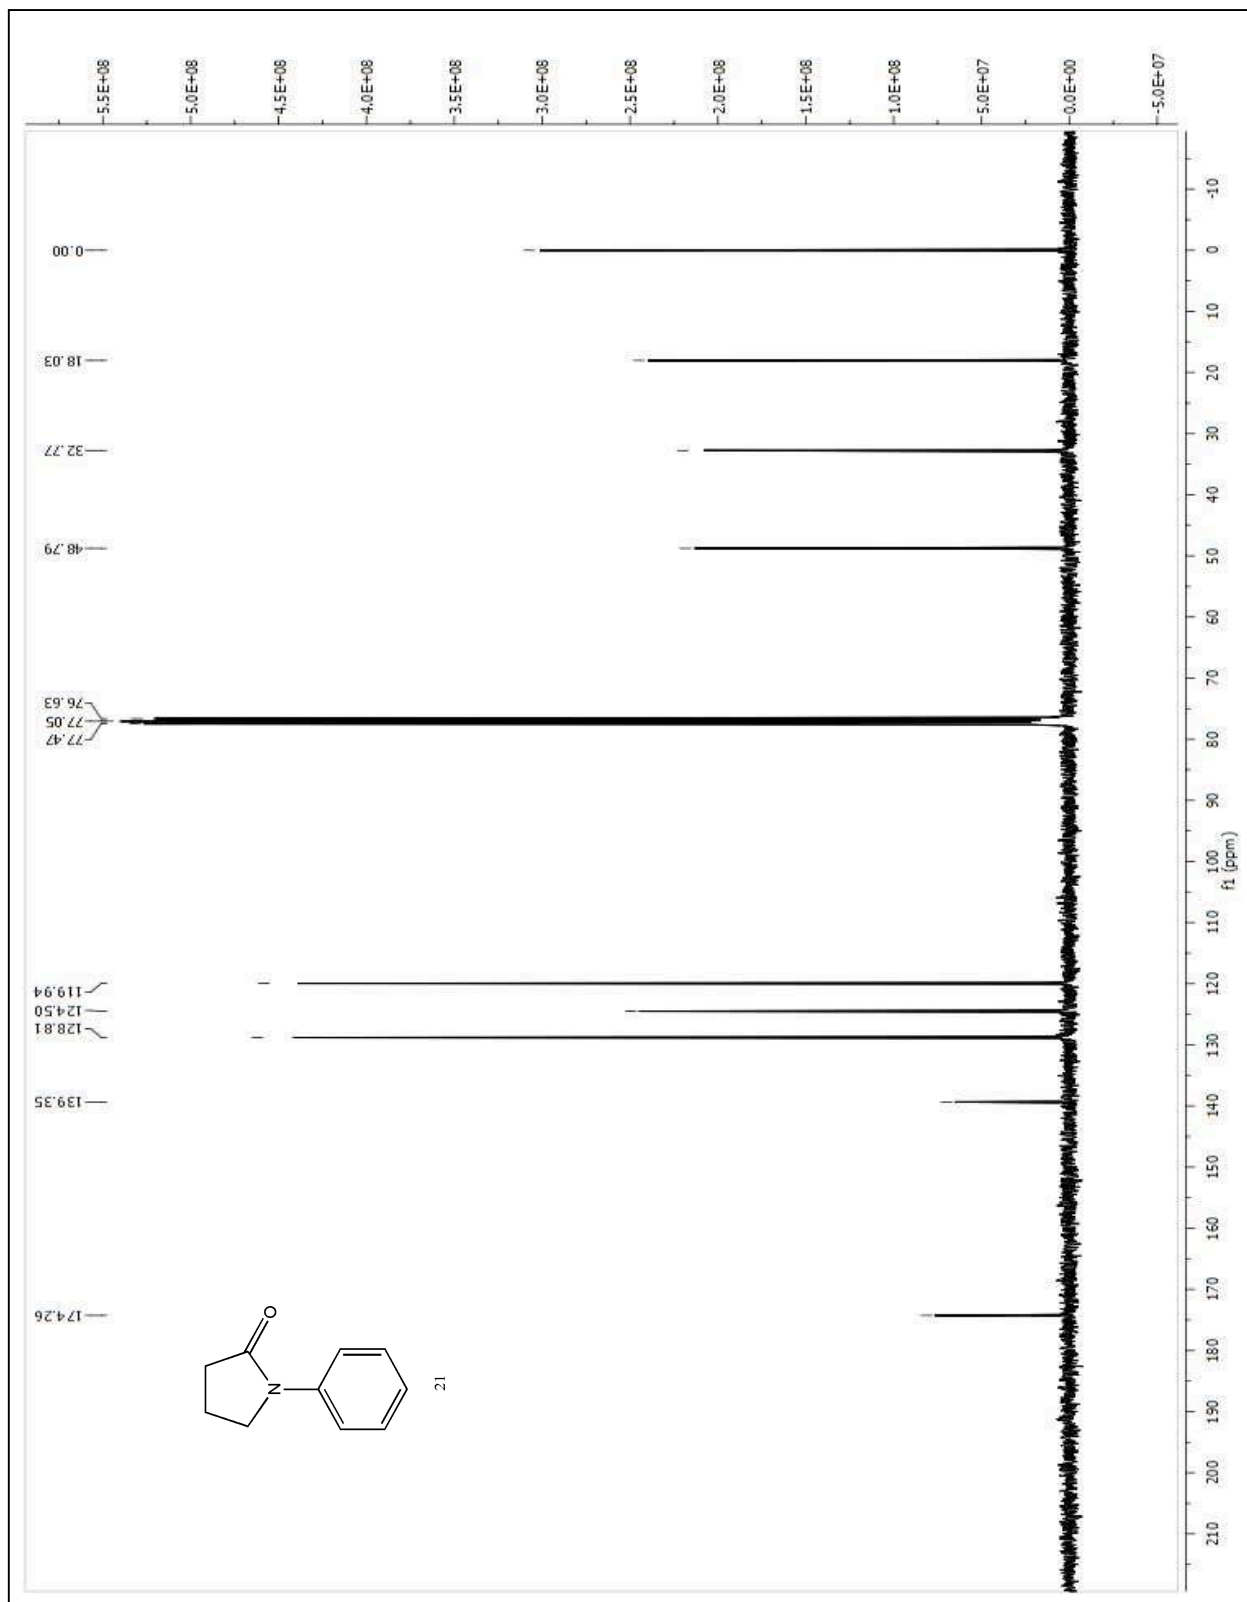

Spectra 28.  $^{13}\text{C}$  NMR of Compound 21

### Synthesis of 5-nitro-2-phenylisoindoline-1,3-dione (**22**)

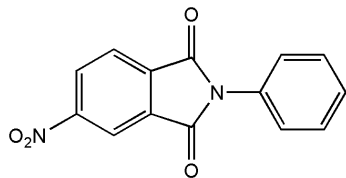

**22**

A magnetically stirred solution of 5-nitroisoindoline-1,3-dione (0.10 g, 0.5220 mmol), iodobenzene diacetate (0.42 g, 1.30 mmol), in 4 mL of benzene was microwave heated at 145 °C for 3h. The excess solvent from the mixture is removed at reduced pressure and the crude product was purified by column chromatography to give pure **22** (0.0557 g, 40 %).

**R<sub>f</sub>-Value:** Hexane/Ethyl acetate (8:2 v/v) = 0.33.

**<sup>1</sup>H NMR (300 MHz, CDCl<sub>3</sub>):**  $\delta$  = 7.26-7.55 (m, 5H), 8.17 (d,  $J$  = 9Hz, 1H), 8.68 (d,  $J$  = 6Hz, 1H), 8.78 (s, 1H).

**<sup>13</sup>C NMR (75 MHz, CDCl<sub>3</sub>):**  $\delta$  = 119.21, 125.04, 126.36, 128.75, 129.35, 129.62, 133.13, 151.82, 164.93.

**LRMS EI (m/z):** [M<sup>+</sup>] calc'd for C<sub>14</sub>H<sub>8</sub>N<sub>2</sub>O<sub>4</sub> 268.05, observed 268.0 m/z.

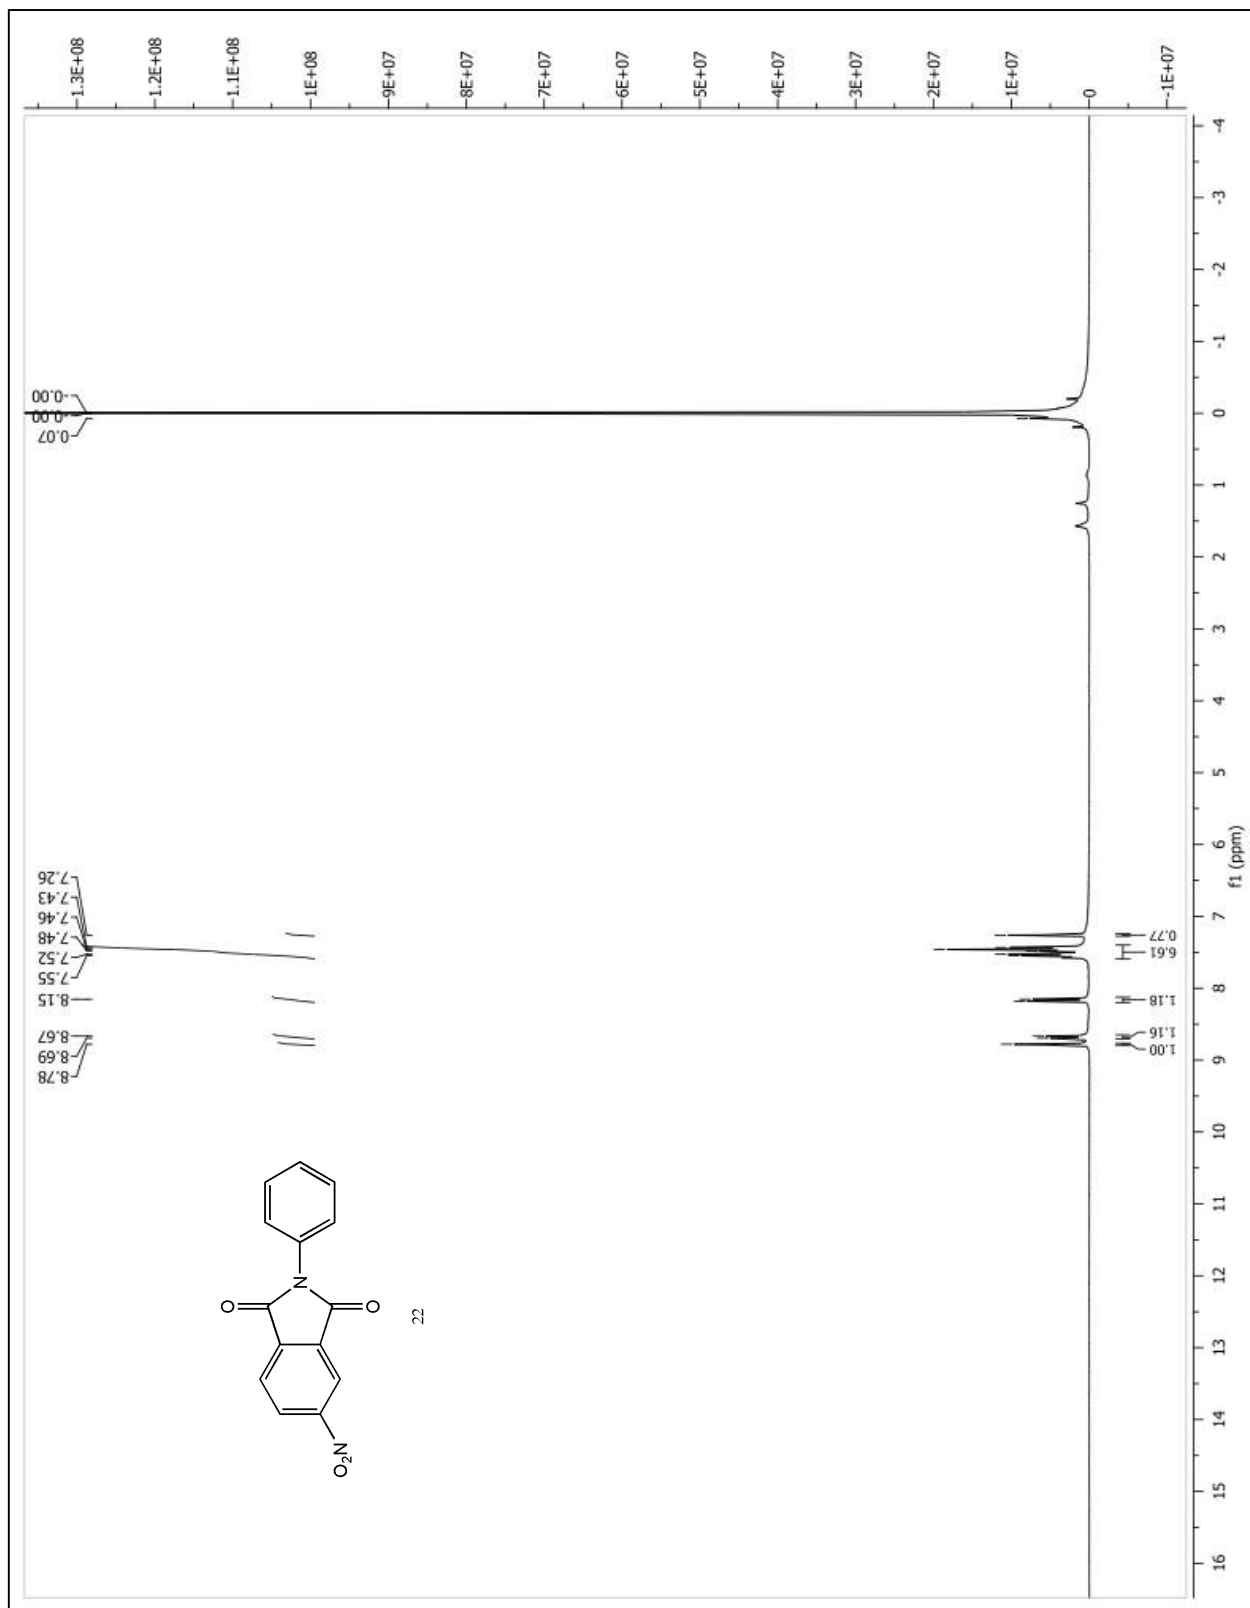

Spectra 29.  $^1\text{H}$  NMR of Compound 22

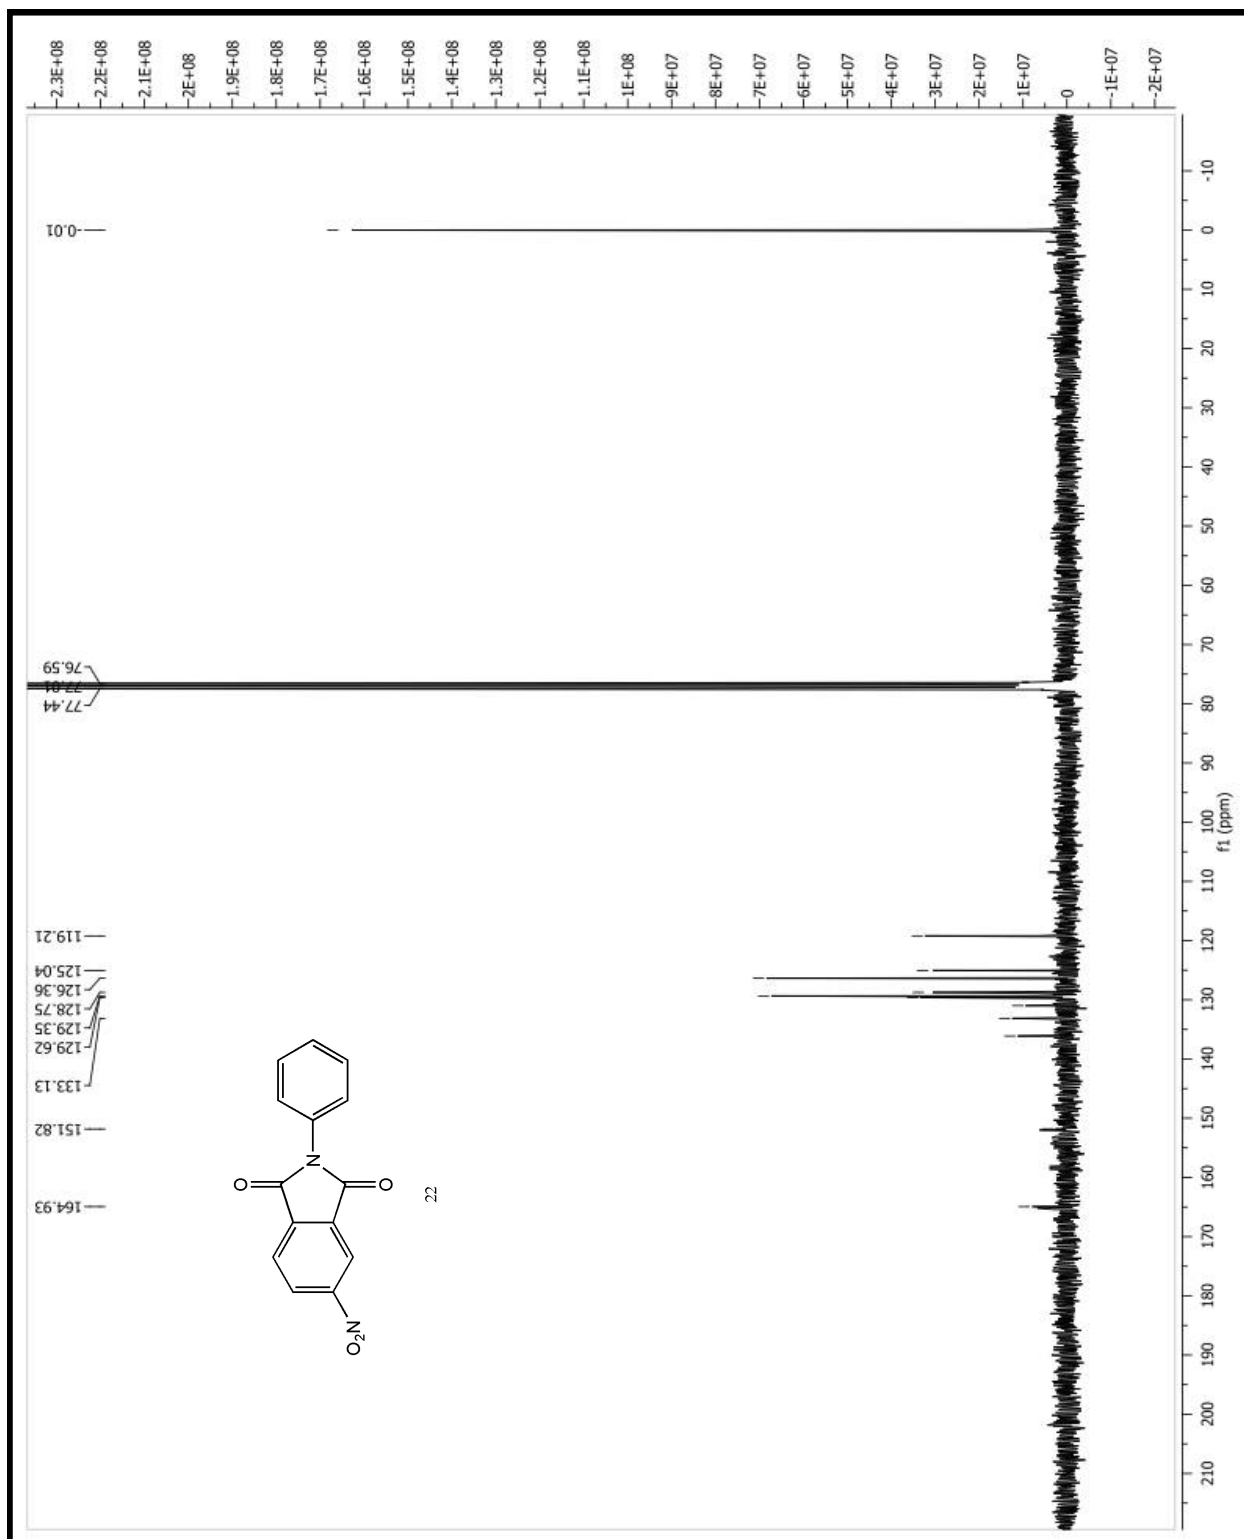

Spectra 30. <sup>13</sup>C NMR of Compound 22



### Synthesis of N-phenyl-1,8-naphthalimide (**23**)

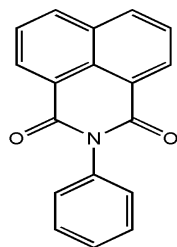

23

A magnetically stirred solution of 1,8-naphthalimide (0.10 g, 0.507 mmol), iodobenzene diacetate (0.41 g, 1.267 mmol), in 4 mL of benzene was microwave heated at 145 °C for 3 h. The excess solvent from the mixture is removed at reduced pressure and the crude product was purified by column chromatography to give pure **23** (0.0356 g, 27 %).

***R<sub>f</sub>*-Value:** Hexane/Ethyl acetate (7:3 v/v) = 0.34.

**<sup>1</sup>H NMR (300 MHz, CDCl<sub>3</sub>):** δ = 7.32-7.59 (m, 5H), 7.78-7.83 (m, 2H), 8.28 (d, *J* = 9 Hz, 2H), 8.66 (d, *J* = 6 Hz, 2H).

**<sup>13</sup>C NMR (75 MHz, CDCl<sub>3</sub>):** δ = 122.81, 127.05, 128.61, 128.73, 129.42, 131.64, 134.30, 135.41, 164.39.

**LRMS EI (m/z):** [M<sup>+</sup>] calc'd for C<sub>18</sub>H<sub>11</sub>NO<sub>2</sub>, 273.08, observed 273.10 m/z.

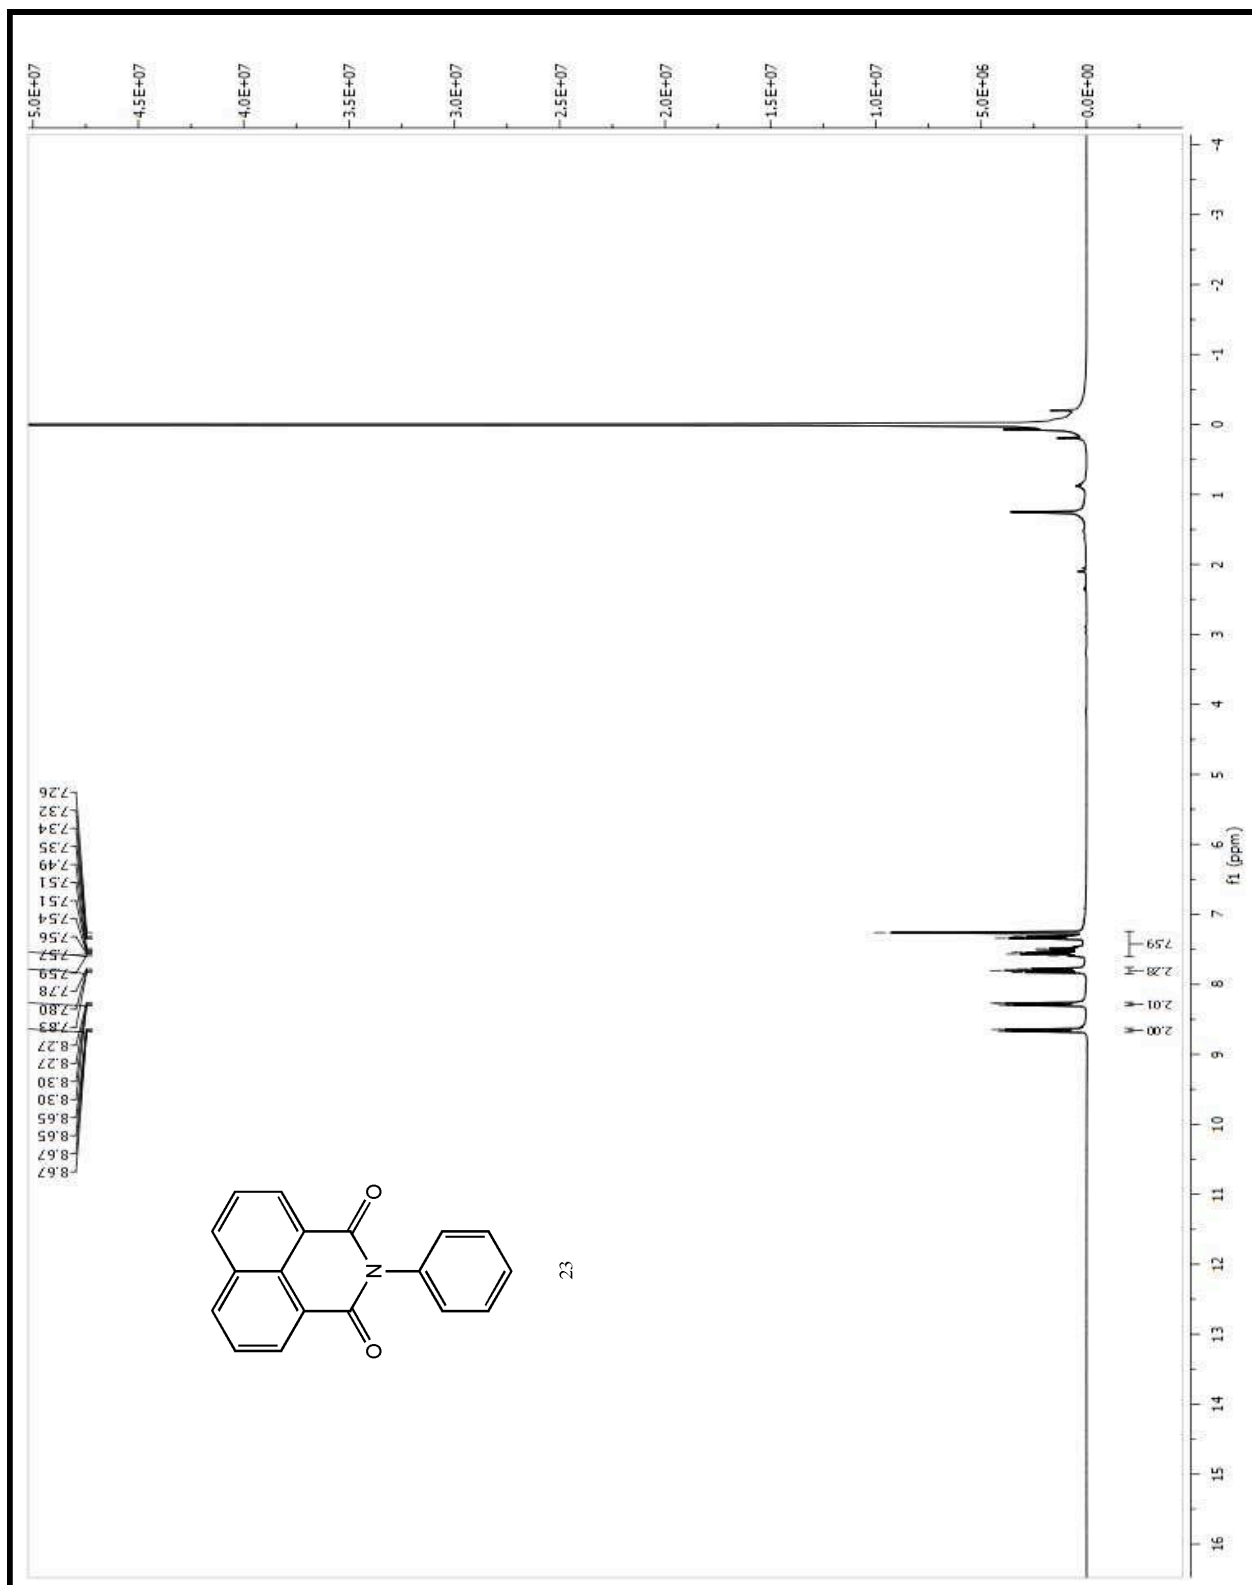

Spectra 31. <sup>1</sup>H NMR of Compound 23

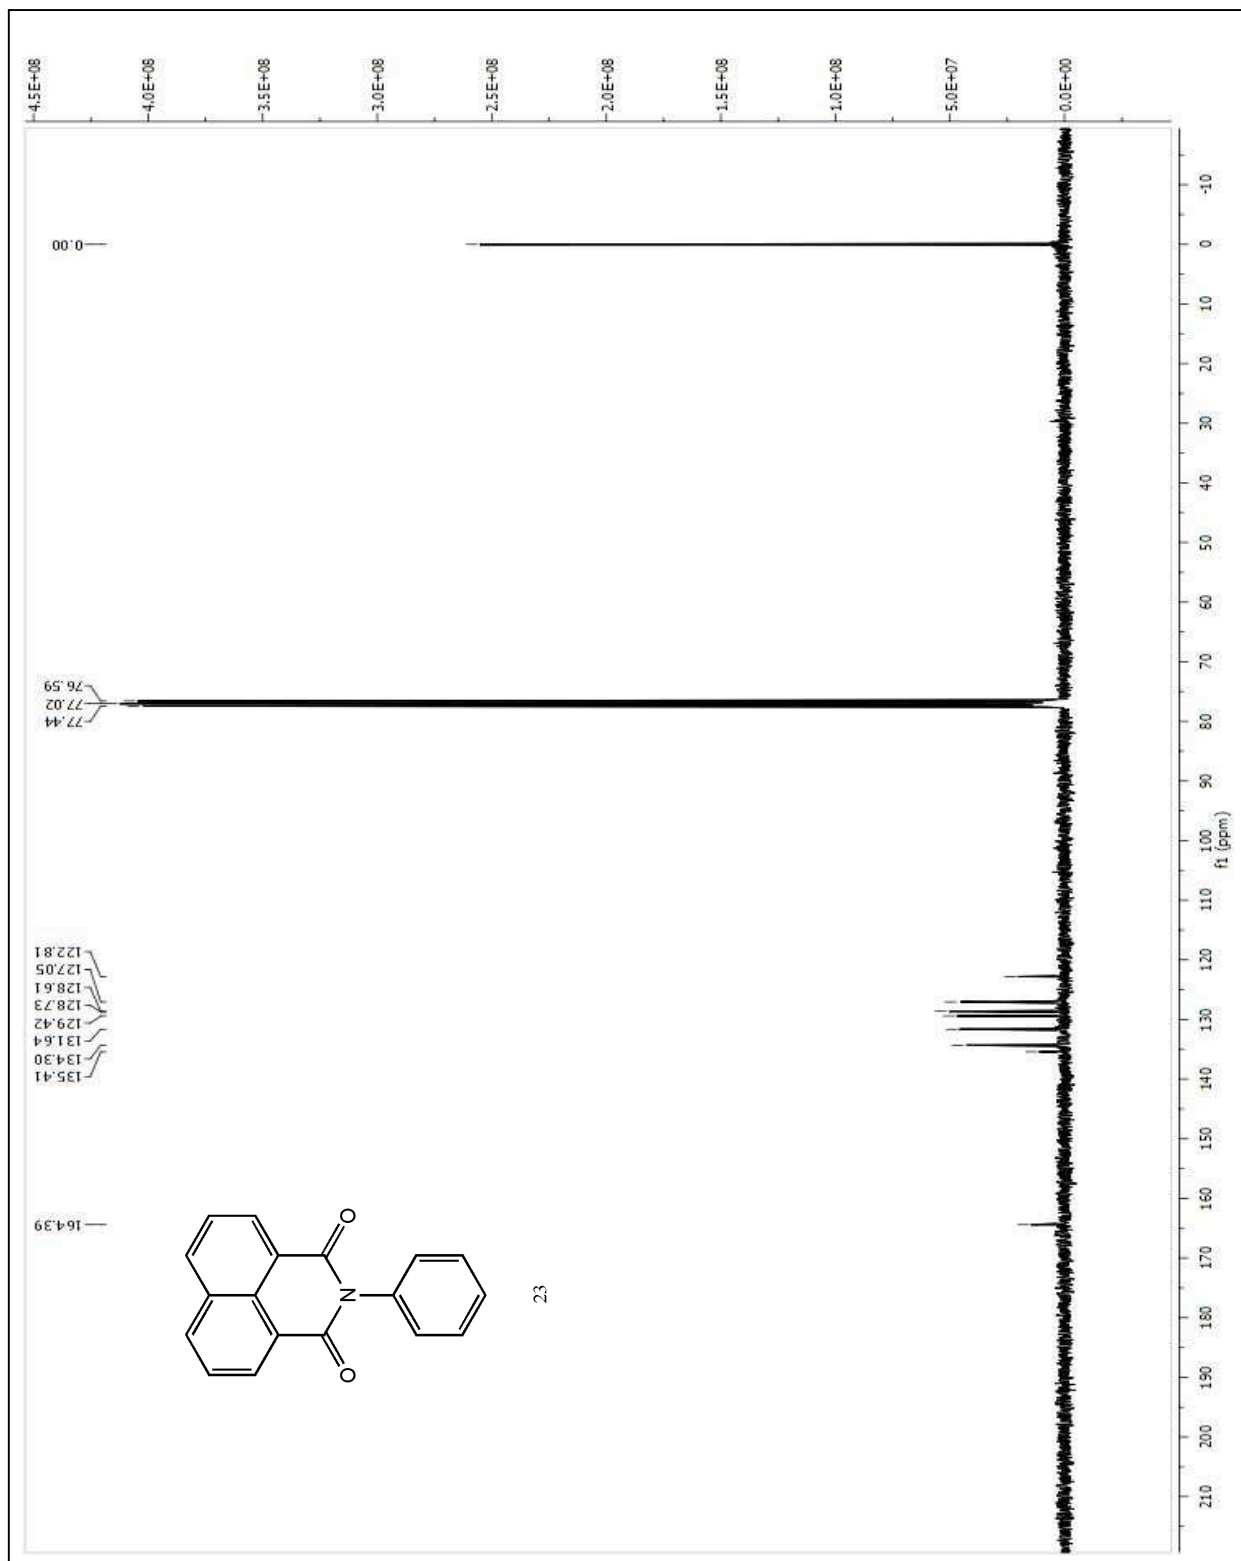

Spectra 32. <sup>13</sup>C NMR of Compound 23

### Synthesis of N-phenyl-1,1-Dioxo-1,2-benzothiazol-3-one (**24**)

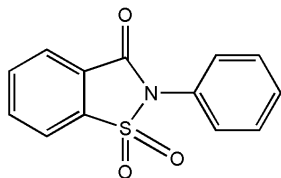

24

A magnetically stirred solution of 1,1-dioxo-1,2-benzothiazol-3-one (0.10 g, 0.546 mmol), iodobenzene diacetate (0.44 g, 1.365 mmol), in 4 mL of benzene was microwave heated at 145 °C for 3 h. The excess solvent from the mixture is removed at reduced pressure and the crude product was purified by column chromatography to give pure **24** (0.037 g, 26 %).

***R<sub>f</sub>*-Value:** Hexane/Ethyl acetate (7:3 v/v) = 0.26.

**<sup>1</sup>H NMR (300 MHz, CDCl<sub>3</sub>):** δ = 7.55 (s, 5H), 7.87-8.01(m, 3H), 8.15 (d, *J* = 9 Hz, 1H).

**<sup>13</sup>C NMR (75 MHz, CDCl<sub>3</sub>):** δ = 120.75, 121.25, 125.65, 127.16, 128.69, 128.75, 129.94, 130.13, 134.49, 135.12, 137.56, 158.40.

**LRMS EI (m/z):** [M<sup>+</sup>] calc'd for C<sub>13</sub>H<sub>9</sub>NO<sub>3</sub>S, 259.03, observed 259.0 m/z.

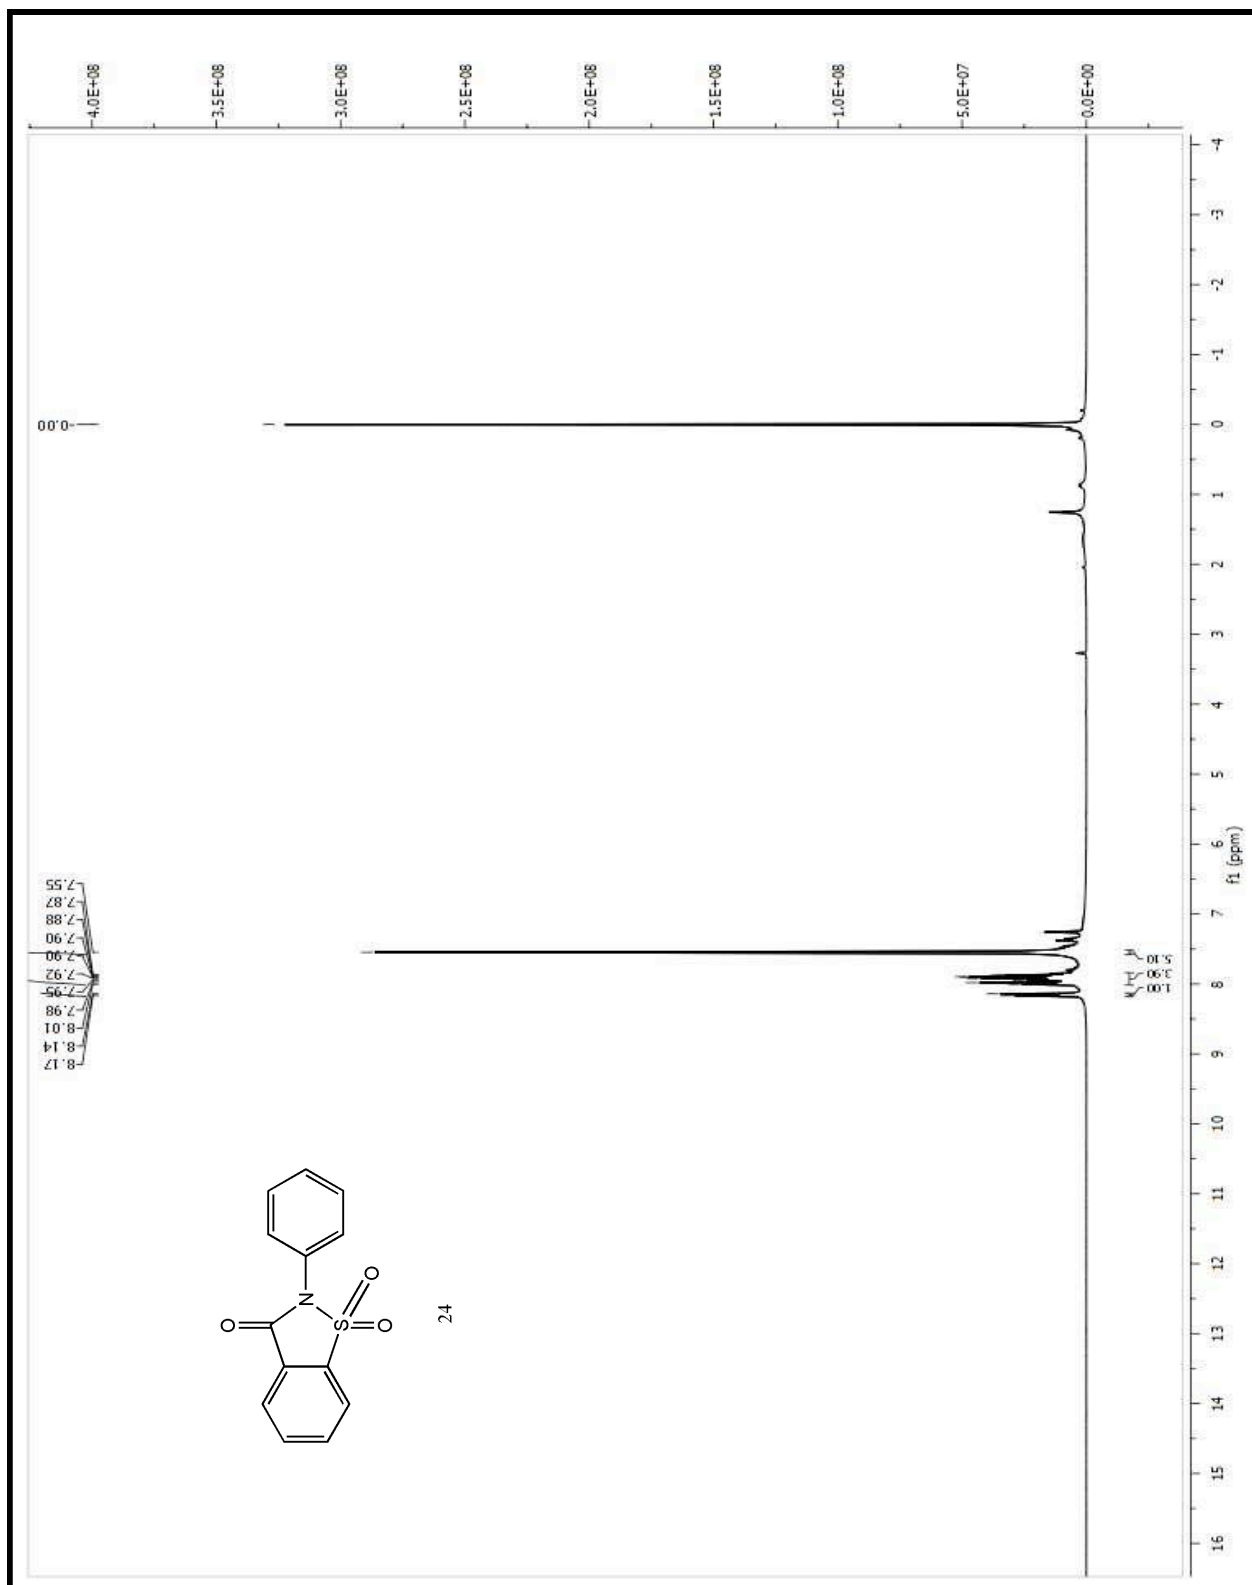

Spectra 33. <sup>1</sup>H NMR of Compound 24

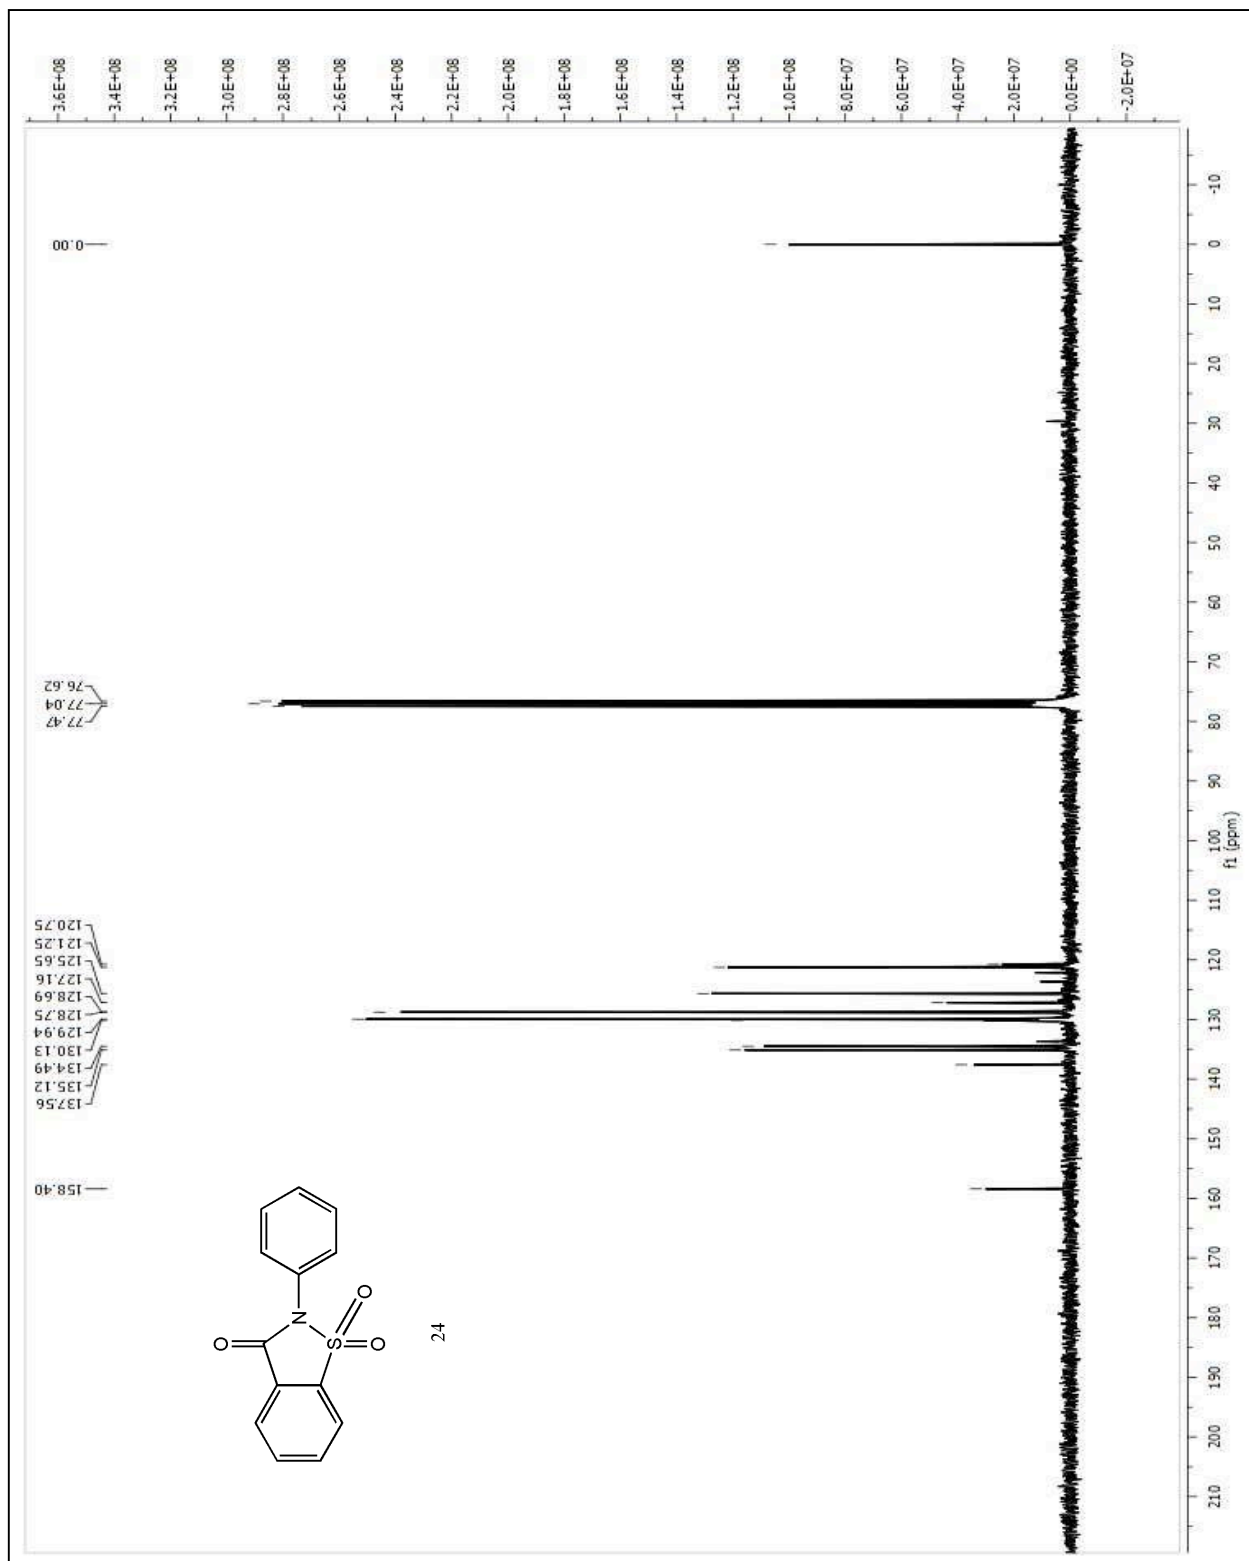

Spectra 34. <sup>13</sup>C NMR of Compound 24

## KIE experiments

### 1) Benzene and benzene- $d_6$

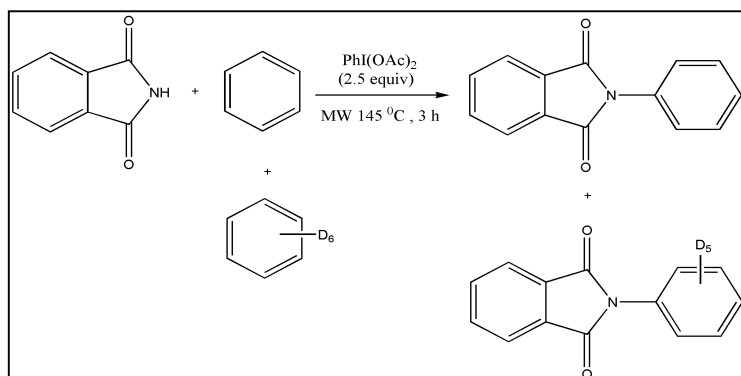

A magnetically stirred solution of phthalimide (0.10 g, 0.68 mmol), iodobenzene diacetate (0.55 g, 1.7 mmol) with equimolar amounts of benzene (2 mL, 22.5 mmol) and benzene- $d_6$  (2 mL, 22.5 mmol) was microwave heated at  $145\text{ }^\circ\text{C}$  for 3 h. The reaction was then cooled, and an aliquot was removed and analyzed by GC/MS.

**GC/MS Conditions:** J & W Scientific DB-1, capillary 25.0 m x 200  $\mu\text{m}$  x 0.33  $\mu\text{m}$ , 1.3 mL/min,  $40\text{ }^\circ\text{C}$ , hold 0.50 min,  $12\text{ }^\circ\text{C}/\text{min}$  to  $320\text{ }^\circ\text{C}$ , hold 6.0 min.

$k_{\text{H}}/k_{\text{D}} = 1.03$

### 2) Phthalimide and phthalimide- $d$

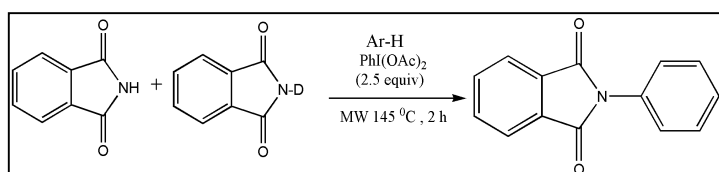

A magnetically stirred equimolar mixture of phthalimide (0.05 g, 0.339 mmol) and phthalimide- $d$  (0.05 g, 0.339 mmol), iodobenzene diacetate (0.27 g, 0.849 mmol) with 4 mL of benzene was microwave heated at  $145\text{ }^\circ\text{C}$  for 2 h. The reaction was then cooled, and an aliquot was removed and analyzed by GC/MS.

**GC/MS Conditions:** J & W Scientific DB-1, capillary 25.0 m x 200  $\mu\text{m}$  x 0.33  $\mu\text{m}$ , 1.3 mL/min,  $40\text{ }^\circ\text{C}$ , hold 0.50 min,  $12\text{ }^\circ\text{C}/\text{min}$  to  $320\text{ }^\circ\text{C}$ , hold 6.0 min.

$k_{\text{H}}/k_{\text{D}} = 0.98$

## Kinetic experiments

### 1) Order in oxidant

The order in the oxidant iodobenzene diacetate was determined by studying the conversion of starting material (**1**) with three different iodobenzene diacetate concentrations. A magnetically stirred solution of phthalimide (0.10 g, 0.68 mmol), iodobenzene diacetate (0.85 mmol, 1.7 mmol or 3.4 mmol) in 4 mL of benzene was microwave heated at 145 °C for 3 h. The reaction was monitored over a time interval of 30 min. The conversion of starting material (**1**) from time  $t = 0$  min to time  $t = 180$  min was calculated by GC-MS using dodecane as an internal standard. A log plot of concentration of (**1**) versus time gave a straight line indicating the first order dependence on oxidant.

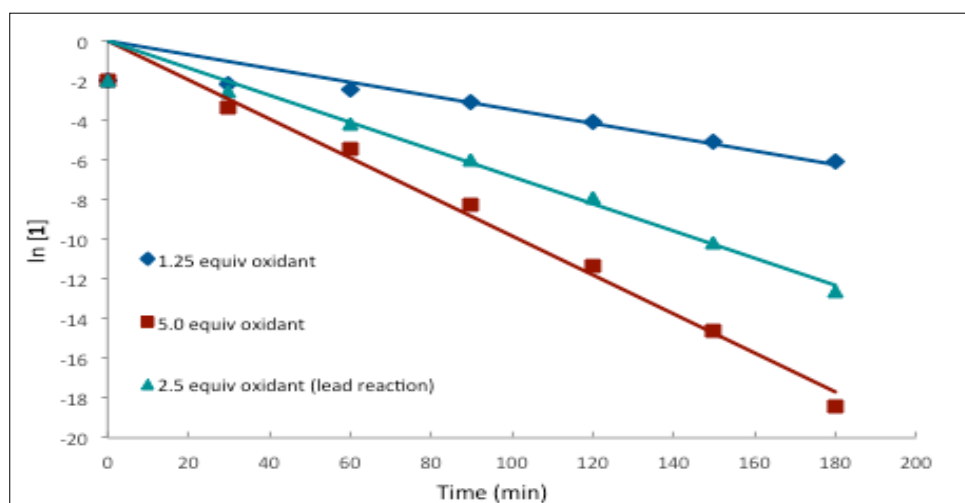

### 2) Order in Substrate

The order in the substrate (**1**) was determined by studying the conversion of starting material (**1**) with varying amounts of (diacetoxyiodo)benzene. A magnetically stirred solution of phthalimide (0.68 mmol or 1.4 mmol), (diacetoxyiodo)benzene (1.7 mmol) in 4 mL of benzene was microwave heated at 145 °C for 3 h. The reaction was monitored over a time interval of 30 min. The conversion of starting material (**1**) from time  $t = 0$  min to time  $t = 180$  min was calculated by GC/MS using dodecane as an internal standard. A log plot of concentration of **1** versus time gave a straight line indicating the first order dependence on substrate **1**.



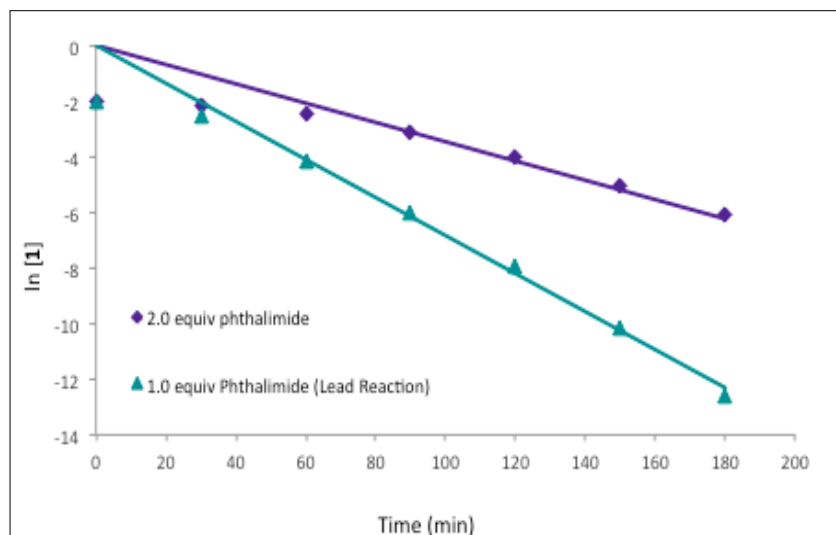

### Competition experiment

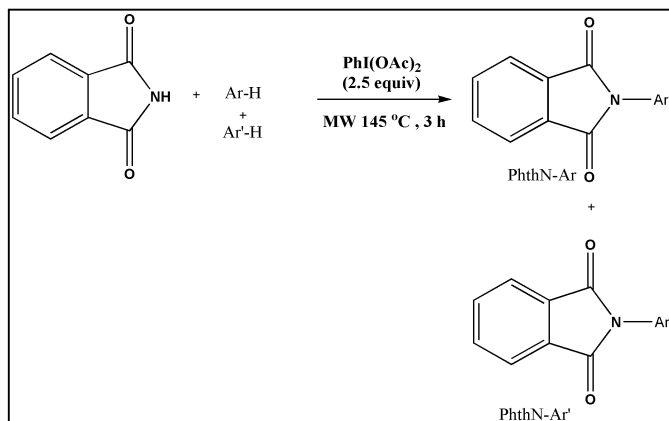

A magnetically stirred solution of phthalimide (0.10 g, 0.68mmol), iodobenzene diacetate (0.55 g, 1.7 mmol) with equimolar amounts of Ar-H (2.0 mL) and Ar'-H (2.0 mL,) was microwave heated at 145 °C for 3 h. The reaction was then cooled, and an aliquot was removed and analyzed by GC/MS.

| Entry | Ar-H             | Ar'-H                      | PhthN-Ar | PhthN-Ar' |
|-------|------------------|----------------------------|----------|-----------|
| 1     | <i>p</i> -xylene | benzene                    | 71%      | 29%       |
| 2     | <i>p</i> -xylene | <i>p</i> -difluoro-benzene | 96%      | 4%        |
| 3     | benzene          | <i>p</i> -difluoro-benzene | 86%      | 14%       |

The ratios of the products were determined by GC/MS.

## Phthalimide Deprotection

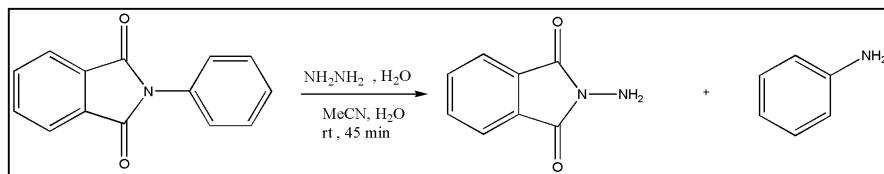

*N*-Hydrazine hydrate (0.15 g, 4.5 mmol) and 3 mL of water was added to a solution of *N*-phenyl phthalimide (0.10 g, 0.45 mmol) in 5 mL acetonitrile. The mixture was stirred for 45 min at room temperature until TLC shows the complete conversion of *N*-phenylphthalimide. An aliquot was removed from the reaction mixture and analyzed by GC/MS.<sup>3</sup>

## References

- 1) Xie, Y.-T.; Hou, R.-S.; Wang, H.-M.; Kang, I.-J.; Chen, L.-C. *J. Chin. Chem. Soc.* **2009**, *56*, 839-842.
- 2) Capitosti, S. M.; Hansen, T. P.; Brown, M. L. *Biorg. Med. Chem.*, **2004**, *12*, 327-336.
- 3) Arifn, A.; Khan, M. N.; Lan, L. C.; May, F. Y.; Yun, C. S. *Synthetic Commun.* **2004**, *34*, 4439-4445.
